# Supplementary material for: Cr-mediated photocatalytic decarboxylative coupling of alpha-oxo acids with benzylic pyridinium salts
Source: Royal Society of Chemistry journal article supplement (doi:10.1039/d4qo00475b), 2024-01-01
Supplement: d4qo00475b1.pdf [file d4qo00475b1.pdf]

## Supporting Information

### **Cr-mediated Photocatalytic Decarboxylative Coupling of alpha-Oxo Acids with Benzylic Pyridinium Salts**

Jia Cao\*, Yan Liu, Zhixiang Wang, Le Liu

China Shaanxi Key Laboratory of Chemical Reaction Engineering, School of Chemistry and Chemical Engineering, Yan'an University, Yan'an 716000 (P. R. China).

Corresponding Author: caojia213@126.com

---

## Table of Contents

|                                                                                                                                       |           |
|---------------------------------------------------------------------------------------------------------------------------------------|-----------|
| <b>1. General Information</b> .....                                                                                                   | <b>3</b>  |
| <b>2. Experimental Details for the Decarboxylative Coupling of <math>\alpha</math>-Oxo Acids with Benzylic pyridinium Salts</b> ..... | <b>3</b>  |
| 2.1 Optimization Studies .....                                                                                                        | 3         |
| 2.2 Gram-scale experiment .....                                                                                                       | 5         |
| 2.3 Experimental Studies on the Reaction Mechanism.....                                                                               | 5         |
| 2.4 Characterization Data of the Products.....                                                                                        | 9         |
| <b>3. Computational Investigations</b> .....                                                                                          | <b>20</b> |
| 3.1 Computational Details.....                                                                                                        | 20        |
| 3.2 Computational fragmentation mechanism of the radical anion the <b>2a</b> <sup>-</sup> .....                                       | 21        |
| 3.3 Single electron transfer from the $\alpha$ -oxocarboxylate <b>1</b> to pyridinium salt <b>2a</b> (SET3).....                      | 21        |
| 3.4 Single electron transfer from the reduced 4CzIPN <sup>-</sup> to CrCl <sub>2</sub> /dtbbpy by photocatalysis (SET4).....          | 22        |
| <b>4. NMR Spectra</b> .....                                                                                                           | <b>23</b> |
| <b>5. Energies and Cartesian Coordinates of the Optimized Structures</b> .....                                                        | <b>46</b> |
| <b>6. References</b> .....                                                                                                            | <b>62</b> |

---

## 1. General Information

All reactions were carried out with standard schlenk techniques under argon or in an argon-filled glove-box. CrCl<sub>2</sub>, CoCl<sub>2</sub>, NiCl<sub>2</sub>, photocatalysis, base and  $\alpha$ -oxo acids were purchased from Sigma-Aldrich, J&K, Alfa Aesar Chemical Companies and Acros used as received without purification. Anhydrous THF and other anhydrous solvents were purchased from J&K and used as received (water < 30 ppm, J&KSeal). Analytical thin-layer chromatography (TLC) was performed on silica gel 60 F<sub>254</sub> aluminum sheets from Qingdao Haiyang Chemical Co., Ltd. Flash chromatography was performed on silica gel (200–300 mesh, Qingdao Haiyang Chemical Co., Ltd). All of Katritzky salts were synthesized according to the literature procedure.<sup>[1]</sup>

<sup>1</sup>H, <sup>13</sup>C, and <sup>19</sup>F NMR spectra were recorded in CDCl<sub>3</sub> on a Bruker AVANCE Avance III 400 instrument. Chemical shifts are reported in parts per million (ppm) and are referenced to the residual solvent resonance as the internal standard (CDCl<sub>3</sub>: 7.26 ppm for <sup>1</sup>H NMR, and 77.16 ppm for <sup>13</sup>C{<sup>1</sup>H NMR}). Data are reported as follows: chemical shift ( $\delta$  ppm), multiplicity (s = singlet, d = doublet, t = triplet, q = quartet, m = multiplet), coupling constants (Hz) and integration. Infrared spectra were recorded on a ThermoFisher Nicolet iS5 FTIR using a neat thin-film technique. High-resolution mass spectra (HRMS) were recorded on the Thermo Quest Finnigan LCQDECA system equipped with an ESI ionization source and a TOF detector mass spectrometer. All the photochemical reactions were performed with blue LED strips (8 W,  $\lambda$  = 450 nm).

## 2. Experimental Details for the Decarboxylative Coupling of $\alpha$ -Oxo Acids with Benzylic pyridinium Salts

### 2.1 Optimization Studies

**General procedure.** In an argon-filled glovebox, to an oven-dried 10 mL vial equipped with a stir bar was added metal salt (0.02 mmol, 10 mol%), 4,4'-Di-tert-butyl-2,2'-bipyridine (L1, dtbbpy, 0.02 mmol, 10 mol%), and anhydrous CH<sub>3</sub>CN (0.5 mL). The reaction solution was stirred for 20 minutes. After the indicated time,  $\alpha$ -oxo acids (0.4 mmol, 2.0 equiv.), alkylpyridinium salts (0.2 mmol, 1.0 equiv.), base (0.3 mmol, 1.5 equiv.), photocatalysis (2 mol%) and anhydrous CH<sub>3</sub>CN (0.5 mL) were added to the reaction vessel for the solution of ligated metal salt. The reaction vial was capped, removed from the glovebox, and stirred with 8 W blue LED strips ( $\lambda$  = 450 nm) for 24 hours. The temperature of the reaction was maintained at room temperature via a fan. Then, the reaction mixture was diluted by ethyl acetate, and filtered through a plug of silica (eluting with ethyl acetate). Finally, the filtrate was concentrated under reduced pressure and the resulting crude material was purified by preparative TLC (petroleum ether/ethyl acetate) to afford the corresponding product.

**Table S1.** Optimization on the base.<sup>[a]</sup>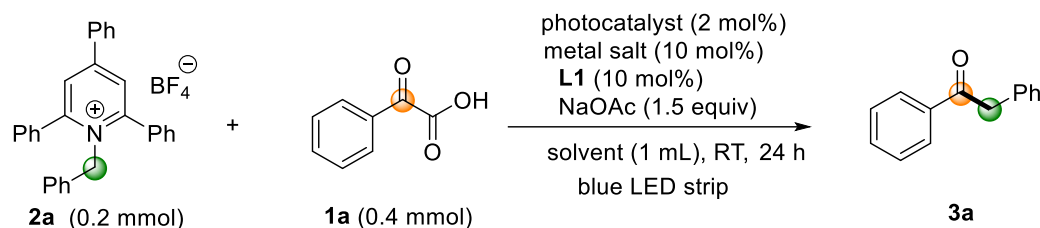

| Entry | photocatalysis                                                   | Metal salt        | base                            | ligand    | solvent            | isolated yield |
|-------|------------------------------------------------------------------|-------------------|---------------------------------|-----------|--------------------|----------------|
| 1     |                                                                  |                   |                                 |           | CH <sub>3</sub> CN | 7%             |
| 2     |                                                                  |                   | NaOAc                           |           | CH <sub>3</sub> CN | 15%            |
| 3     | Ir[dF(CF <sub>3</sub> )ppy] <sub>2</sub> (dtbbpy)PF <sub>6</sub> |                   | NaOAc                           | <b>L1</b> | CH <sub>3</sub> CN | 22%            |
| 4     | Ir[dF(CF <sub>3</sub> )ppy] <sub>2</sub> (dtbbpy)PF <sub>6</sub> | NiCl <sub>2</sub> |                                 | <b>L1</b> | CH <sub>3</sub> CN | 28%            |
| 5     | Ir[dF(CF <sub>3</sub> )ppy] <sub>2</sub> (dtbbpy)PF <sub>6</sub> | NiCl <sub>2</sub> | NaI                             | <b>L1</b> | CH <sub>3</sub> CN | N D            |
| 6     | Ir[dF(CF <sub>3</sub> )ppy] <sub>2</sub> (dtbbpy)PF <sub>6</sub> | NiCl <sub>2</sub> | Cs <sub>2</sub> CO <sub>3</sub> | <b>L1</b> | CH <sub>3</sub> CN | N D            |
| 7     | Ir[dF(CF <sub>3</sub> )ppy] <sub>2</sub> (dtbbpy)PF <sub>6</sub> | NiCl <sub>2</sub> | Na <sub>2</sub> CO <sub>3</sub> | <b>L1</b> | CH <sub>3</sub> CN | 15%            |
| 8     | Ir[dF(CF <sub>3</sub> )ppy] <sub>2</sub> (dtbbpy)PF <sub>6</sub> | NiCl <sub>2</sub> | Li <sub>2</sub> CO <sub>3</sub> | <b>L1</b> | CH <sub>3</sub> CN | 16%            |
| 9     | Ir[dF(CF <sub>3</sub> )ppy] <sub>2</sub> (dtbbpy)PF <sub>6</sub> | NiCl <sub>2</sub> | K <sub>2</sub> HPO <sub>4</sub> | <b>L1</b> | CH <sub>3</sub> CN | 18%            |
| 10    | Ir[dF(CF <sub>3</sub> )ppy] <sub>2</sub> (dtbbpy)PF <sub>6</sub> | NiCl <sub>2</sub> | NaOMe                           | <b>L1</b> | CH <sub>3</sub> CN | 27%            |
| 11    | Ir[dF(CF <sub>3</sub> )ppy] <sub>2</sub> (dtbbpy)PF <sub>6</sub> | NiCl <sub>2</sub> | K <sub>2</sub> CO <sub>3</sub>  | <b>L1</b> | CH <sub>3</sub> CN | 29%            |
| 12    | Ir[dF(CF <sub>3</sub> )ppy] <sub>2</sub> (dtbbpy)PF <sub>6</sub> | NiCl <sub>2</sub> | NaOAc                           | <b>L1</b> | CH <sub>3</sub> CN | 38%            |
| 13    | Ir[dF(CF <sub>3</sub> )ppy] <sub>2</sub> (dtbbpy)PF <sub>6</sub> | NiCl <sub>2</sub> | NaOAc                           | <b>L1</b> | THF                | 50%            |

<sup>[a]</sup>Reaction conditions: **1a** (0.4 mmol, 1.0 equiv.), **2a** (0.2 mmol, 2.0 equiv.), NiCl<sub>2</sub> (10 mol%), 4,4'-Di-tert-butyl-2,2'-bipyridine ligand (**L1**), base (2.0 equiv.) and Ir[dF(CF<sub>3</sub>)ppy]<sub>2</sub>(dtbbpy)PF<sub>6</sub> [(4,4'-Di-tert-butyl-2,2'-bipyridine)bis[3,5-difluoro-2-[5-trifluoromethyl-2-pyridinyl-kN)phenyl-kC]iridium(III), 2 mol%] in CH<sub>3</sub>CN (1.0 mL). Yields were isolated yield of analytically pure material after purification on preparative thin-layer chromatography. ND = Not detected.

## 2.2 Gram-scale experiment

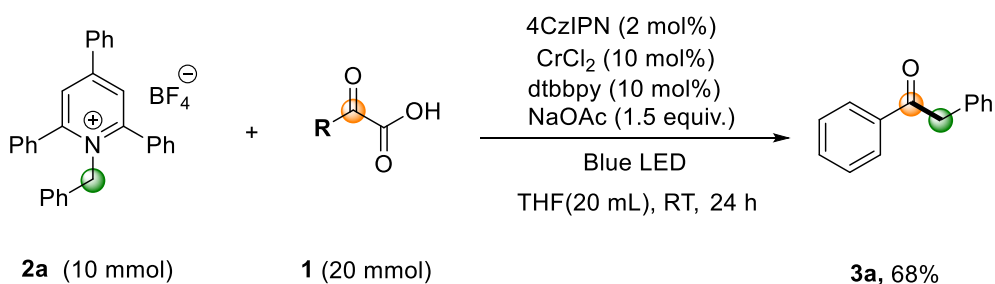

**Experimental procedure:** In an argon-filled glovebox, to an oven-dried 10 mL vial equipped with a stir bar was added CrCl<sub>2</sub> (122 mg, 10 mol%), 4,4'-Di-tert-butyl-2,2'-bipyridine (dtbbpy, 268.4 mg, 0.02 mmol, 10 mol%), and THF (5 mL). The reaction solution was stirred for 20 minutes. After the indicated time,  $\alpha$ -oxo acids (3.0 g, 20.0 mmol, 2.0 equiv.), NaOAc (1.23 mg, 15 mmol, 1.5 equiv.), 4CzIPN (2 mol%, 157.6 mg) and THF (25 mL) were added to the reaction vessel for the solution of ligated CrCl<sub>2</sub>. The reaction vial was capped, removed from the glovebox, and stirred with 8 W blue LED strips ( $\lambda=450$  nm) for 24 hours. The temperature of the reaction was maintained at room temperature via a fan. After 24 hours, the reaction mixture was diluted by ethyl acetate, and filtered through a plug of silica (eluting with ethyl acetate). The solvent were removed under reduced pressure and the crude product was purified by flash chromatography on silica gel with petroleum ether/ethyl acetate (100:1). The corresponding product **3a** as colorless oil was isolated in 68% yield.

## 2.3 Experimental Studies on the Reaction Mechanism

### 2.3.1 Radical trapping experiment

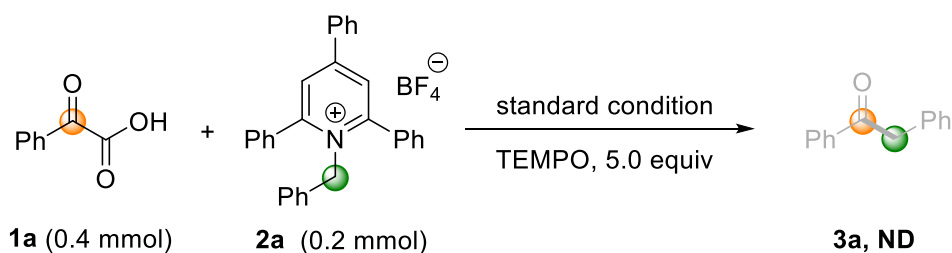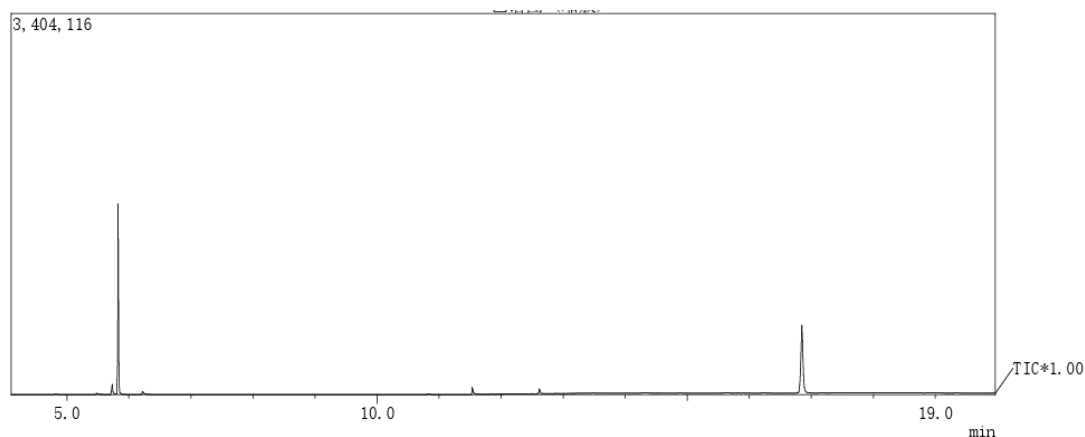

**Experimental procedure:** In an argon-filled glovebox, to an oven-dried 10 mL vial equipped with a stir bar was added CrCl<sub>2</sub> (2.5 mg, 0.02 mmol, 10 mol%), 4,4'-Di-tert-butyl-2,2'-bipyridine (dtbbpy, 5.4 mg, 0.02 mmol, 10 mol%), and THF (0.5 mL). The reaction solution was stirred for 20 minutes. After the indicated time,  $\alpha$ -oxo acids (60 mg, 0.4 mmol, 2.0 equiv.), benzylicpyridinium salts (97.0 mg, 0.2 mmol, 1.0 equiv.), 2,2,6,6-tetramethylpiperidinoxy (TEMPO, 1 mmol, 156.2 mg, 5 equiv.), NaOAc (24.6 mg, 0.3 mmol, 1.5 equiv.), 4CzIPN (2 mol%, 3.2 mg) and THF (0.5 mL) were added to the reaction vessel for the solution of ligated CrCl<sub>2</sub>. The reaction vial was capped, removed from the glovebox, and stirred with 8 W blue LED strips ( $\lambda=450$  nm) for 24 hours. The temperature of the reaction was maintained at room temperature via a fan. After 24 hours, the crude reaction mixture was subject to the GC-MS analysis.

### 2.3.2 Control experiments

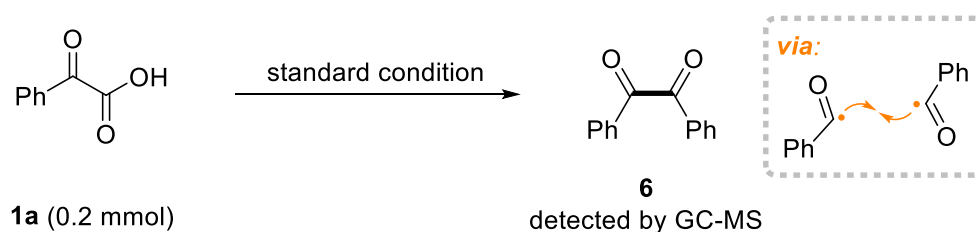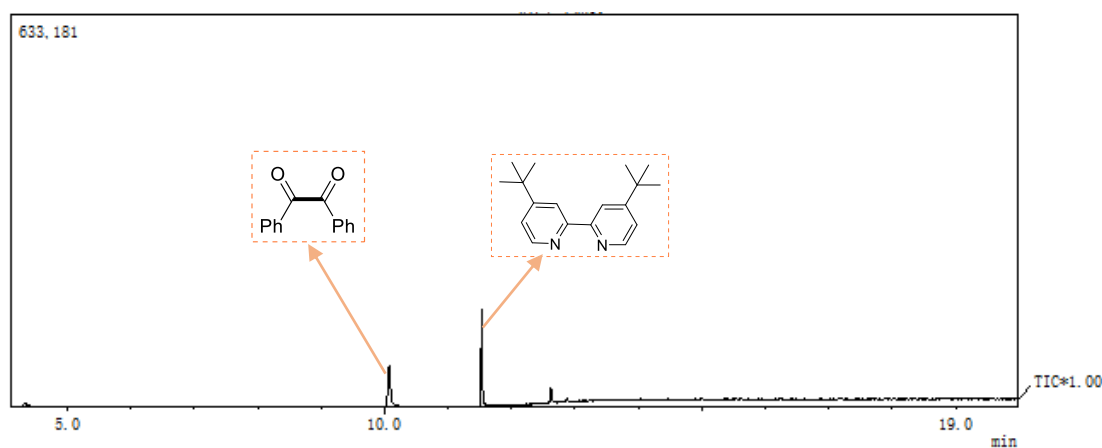

**Figure S1**

**Experimental procedure:** In an argon-filled glovebox, to an oven-dried 10 mL vial equipped with a stir bar was added CrCl<sub>2</sub> (0.02 mmol, 10 mol%), 4,4'-Di-tert-butyl-2,2'-bipyridine (dtbbpy, 5.4 mg, 0.02 mmol, 10 mol%), and THF (0.5 mL). The reaction solution was stirred for 20 minutes. After the indicated time,  $\alpha$ -oxo acids (60 mg, 0.4 mmol, 2.0 equiv.), NaOAc (24.6 mg, 0.3 mmol, 1.5 equiv.), 4CzIPN (2 mol%, 3.2 mg) and THF (0.5 mL) were added to the reaction vessel for the solution of ligated CrCl<sub>2</sub>. The reaction vial was capped, removed from the glovebox, and stirred with 8 W blue LED strips ( $\lambda=450$  nm) for 24 hours. The temperature of the reaction was maintained at room temperature via a fan. After 24 hours, the crude reaction mixture was subject to the GC-MS analysis.

### 2.3.3 Trapping the intermediates by HRMS analysis

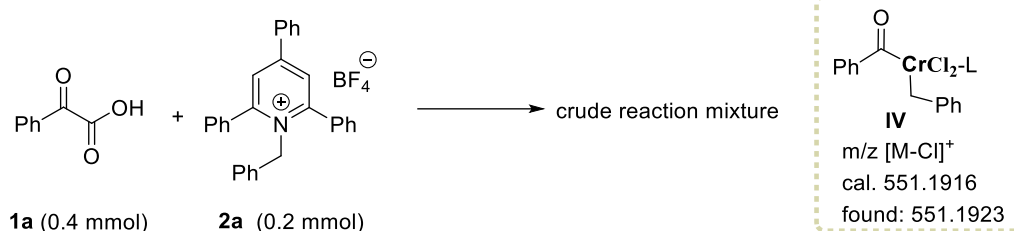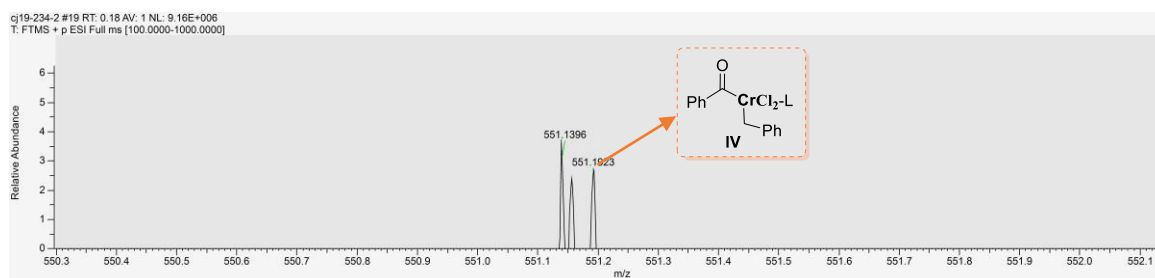

Figure S2

**Experimental procedure:** In an argon-filled glovebox, to an oven-dried 10 mL vial equipped with a stir bar was added CrCl<sub>2</sub> (2.5 mg, 0.02 mmol, 10 mol%), 4,4'-Di-tert-butyl-2,2'-bipyridine (dtbbpy, 0.02 mmol, 5.4 mg, 10 mol%), and THF (0.5 mL). The reaction solution was stirred for 20 minutes. After the indicated time,  $\alpha$ -oxo acids (60 mg, 0.4 mmol, 2.0 equiv.), alkylpyridinium salts (97 mg, 0.2 mmol, 1.0 equiv.), NaOAc (24.6 mg, 0.3 mmol, 1.5 equiv.), 4CzIPN (2 mol%, 3.2 mg) and THF (0.5 mL) were added to the reaction vessel for the solution of ligated CrCl<sub>2</sub>. The reaction vial was capped, removed from the glovebox, and stirred with 8 W blue LED strips ( $\lambda=450$  nm) for 16 hours. The temperature of the reaction was maintained at room temperature via a fan. After 16 hours, the reaction vial was transferred to the glovebox for the sample preparation of HRMS analysis. Then, the prepared sample of crude reaction mixture was subject to the HRMS analysis using anhydrous CH<sub>3</sub>CN as the solvent.

### 2.3.4 Light on/off experiment

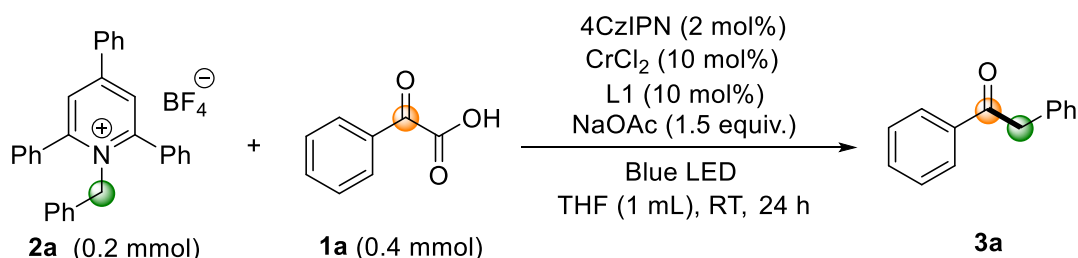

We carried out the light on/off experiments by the reaction of **2a** and **1a** under standard conditions, suggesting light irradiation is essential for this protocol.

**Experimental procedure:** according to the general procedure, six oven-dried reaction vials were charged respectively CrCl<sub>2</sub> (2.5 mg, 10 mol%), 4,4'-Di-tert-butyl-2,2'-bipyridine (dtbbpy, 5.4 mg, 10

mol%),  $\alpha$ -oxo acids (60 mg, 0.4 mmol, 2.0 equiv.), benzylicpyridinium salts (97.0 mg, 0.2 mmol, 1.0 equiv.), NaOAc (0.3 mmol, 1.5 equiv. 24.6 mg,) 4CzIPN (2 mol%, 3.2 mg) and THF (1 mL) in an argon-filled glove box. The vials were irradiated under blue LED (8 W,  $\lambda=450$  nm) irradiation. After 1.5 hour, the lamps were turned off, and one vial was removed from the irradiation setup for analysis. The remaining five vials were stirred in the absence of light for an additional 1.5 hour. Then, one vial was removed for analysis, and the other lamps were turned back on to irradiate. After an additional 1.5 hours of irradiation, the lamps were turned off, and one vial was removed for analysis. The remaining vials were stirred in the absence of light for an additional 1.5 hour. Then, a vial was removed for analysis, and the other lamps were turned back on to irradiate the remaining one reaction mixture. After an additional 1.5 hours of irradiation, the lamps were turned off, and the last vial was removed for analysis. The reaction mixtures were diluted by ethyl acetate, and filtered through a plug of silica (eluting with ethyl acetate). Finally, the filtrate was concentrated under reduced pressure and the resulting crude material was purified by preparative TLC (petroleum ether/ethyl acetate) to afford the corresponding product.

### 2.3.3 Stern-Volmer luminescence quenching experiments

Stern-Volmer luminescence quenching analysis was conducted using a HITACHI F-7000 spectrofluorometer. All the mixed degassed anhydrous THF solutions were excited at 420 nm and the emission intensity at 512 nm was observed. All samples used in the luminescence quenching experiments were freshly prepared under oxygen free conditions (or in a glovebox under a positive pressure of argon) and placed in a 4 mL screw-top quartz cuvette at room temperature.  $I_0$  = emission intensity of the photocatalyst in isolation at the specified wavelength;  $I$  = observed emission intensity of the photocatalyst with added quencher.

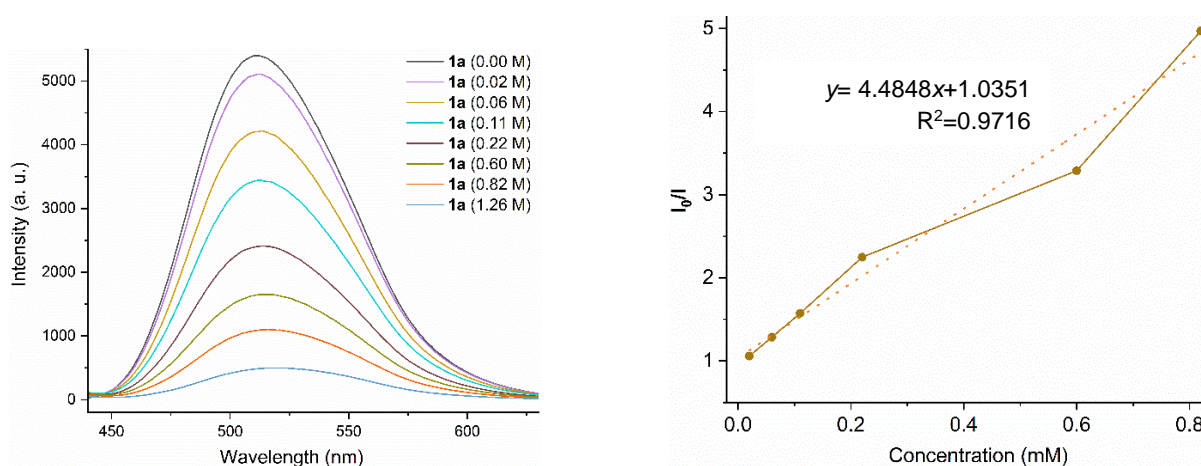

**Figure S3.** Luminescence spectrum of 4CzIPN as a function of concentration of benzoylformic acid **1a** in degassed THF with excitation at 420 nm,  $[4CzIPN] = 2 \times 10^{-5}$  M.



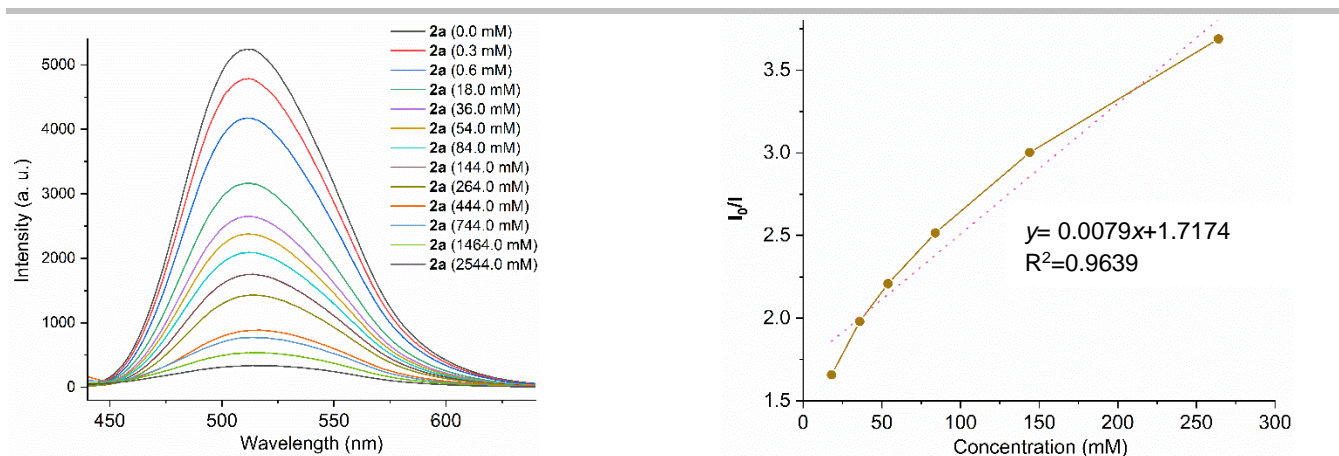

**Figure S4.** Luminescence spectrum of 4CzIPN as a function of concentration of benzylic pyridinium salt **2a** in degassed THF with excitation at 420 nm,  $[4\text{CzIPN}] = 2 \times 10^{-5} \text{ M}$ .

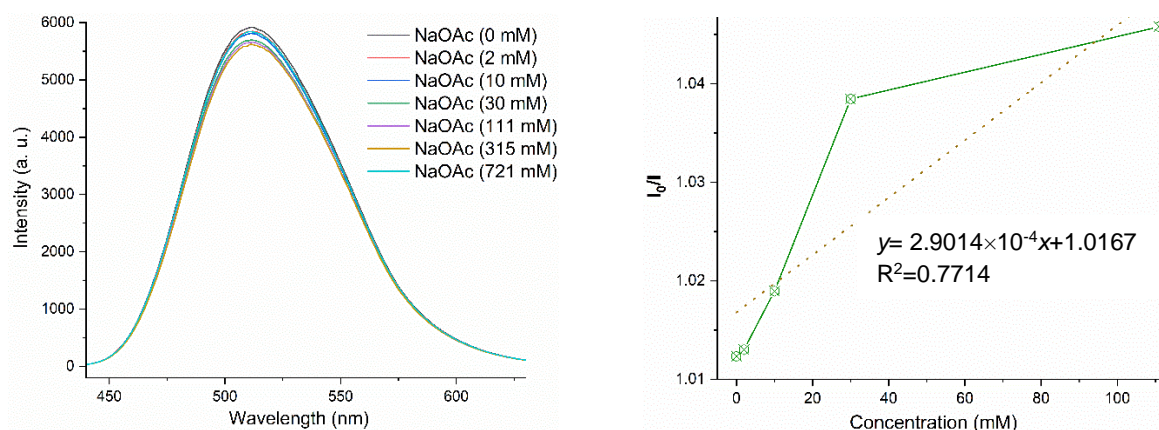

**Figure S5.** Luminescence spectrum of 4CzIPN as a function of concentration of NaOAc in degassed THF with excitation at 420 nm,  $[4\text{CzIPN}] = 2 \times 10^{-5} \text{ M}$ .

## 2.4 Characterization Data of the Products

### 2.4.1 Characterization data of 1,2-diphenylethan-1-one (**3a**)

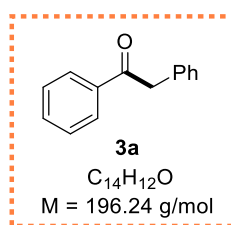

Prepared according to general procedure from  $\text{CrCl}_2$  (2.5 mg, 10 mol%), 4,4'-Di-tert-butyl-2,2'-bipyridine (dtbbpy, 5.4 mg, 10 mol%),  $\alpha$ -oxo acids (60 mg, 0.4 mmol, 2.0 equiv.), benzylicpyridinium salts (97.0 mg, 0.2 mmol, 1.0 equiv.), NaOAc (0.3 mmol, 1.5 equiv. 24.6 mg), 4CzIPN (2 mol%, 3.2 mg) and THF (1 mL) under blue LED (8 W,  $\lambda=450 \text{ nm}$ ) irradiation for 24 hours. Purification by preparative TLC (petroleum PE/EA = 20:1) to afford **3a** as white solid (30.5 mg, 78% yield), mp = 47-50

°C; **<sup>1</sup>H NMR** (CDCl<sub>3</sub>, 400 MHz): δ 7.98 – 7.95 (m, 2H), 7.52 – 7.47 (m, 1H), 7.42 – 7.37 (m, 2H), 7.30 – 7.25 (m, 2H), 7.23 – 7.15 (m, 3H), 4.23 (s, 2H) ppm. **<sup>13</sup>C{<sup>1</sup>H} NMR** (100 MHz, CDCl<sub>3</sub>): δ 197.7, 136.7, 134.6, 133.2, 129.5, 128.7, 128.7, 128.7, 126.9, 45.5 ppm. **IR** (film): 3007, 1520, 1480, 1380, 1275, 764, 750 cm<sup>-1</sup>. **HRMS** (ESI): calculated for C<sub>14</sub>H<sub>13</sub>O<sup>+</sup> [M+H]<sup>+</sup> 197.0961, found 197.0959. Spectra data of this compound are consistent with literature data.<sup>[2]</sup>

#### 2.4.2 Characterization data of 1-(4-fluorophenyl)-2-phenylethan-1-one (**3b**)

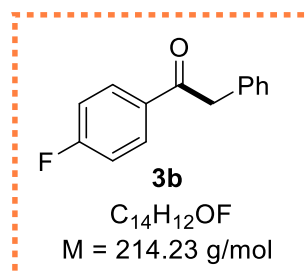

Prepared according to general procedure from CrCl<sub>2</sub> (2.5 mg, 10 mol%), 4,4'-Di-tert-butyl-2,2'-bipyridine (dtbbpy, 5.4 mg, 10 mol%), 2-(4-fluorophenyl)-2-oxoacetic acid (67.2 mg, 0.4 mmol, 2.0 equiv.), benzylicpyridinium salts (97.0 mg, 0.2 mmol, 1.0 equiv.), NaOAc (0.3 mmol, 1.5 equiv. 24.6 mg), 4CzIPN (2 mol%, 3.2 mg) and THF (1 mL) under blue LED (8 W, λ=450 nm) irradiation for 24 hours. Purification by preparative TLC (petroleum PE/EA = 20:1) to afford **3b** as white solid (26.1 mg, 61% yield), mp = 70-72 °C; **<sup>1</sup>H NMR** (CDCl<sub>3</sub>, 400 MHz): δ 8.05 – 8.00 (m, 2H), 7.37 – 7.29 (m, 2H), 7.28 – 7.20 (m, 3H), 7.14 – 7.07 (m, 2H), 4.17 (s, 2H) ppm. **<sup>13</sup>C{<sup>1</sup>H} NMR** (100 MHz, CDCl<sub>3</sub>): δ 196.1, 165.8 (d, J<sub>C-F</sub> = 255.1 Hz), 134.4, 133.1, 133.0, 131.3 (d, J<sub>C-F</sub> = 9.2 Hz), 129.5, 128.8, 127.1, 115.8 (d, J<sub>C-F</sub> = 21.9 Hz), 45.6 ppm. **<sup>19</sup>F NMR** (CDCl<sub>3</sub>, 376 MHz) δ -104.9 ppm. **IR** (film): 3005, 2326, 1510, 1275, 1261, 760, 745 cm<sup>-1</sup>. **HRMS** (ESI): calculated for C<sub>14</sub>H<sub>12</sub>OF<sup>+</sup> [M+H]<sup>+</sup> 215.0867, found 215.0864. Spectra data of this compound are consistent with literature data.<sup>[3]</sup>

#### 2.4.3 Characterization data of 1-(4-bromophenyl)-2-phenylethan-1-one (**3c**)

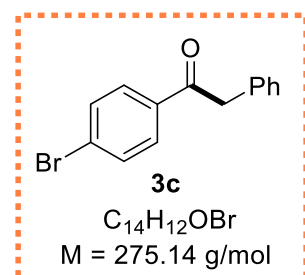

Prepared according to general procedure from CrCl<sub>2</sub> (2.5 mg, 10 mol%), 4,4'-Di-tert-butyl-2,2'-bipyridine (dtbbpy, 5.4 mg, 10 mol%), 2-(4-bromophenyl)-2-oxoacetic acid (91.6 mg, 0.4 mmol, 2.0 equiv.), benzylicpyridinium salts (97.0 mg, 0.2 mmol, 1.0 equiv.), NaOAc (0.3 mmol, 1.5 equiv. 24.6 mg), 4CzIPN (2 mol%, 3.2 mg) and THF (1 mL) under blue LED (8 W, λ=450 nm) irradiation for 24

hours. Purification by preparative TLC (petroleum PE/EA = 20:1) to afford **3c** as white solid (43.4 mg, 79% yield), mp = 103-105 °C. **<sup>1</sup>H NMR** (CDCl<sub>3</sub>, 400 MHz): δ 7.89 – 7.85 (m, 2H), 7.63 – 7.56 (m, 2H), 7.38 – 7.30 (m, 2H), 7.26 – 7.20 (m, 3H), 4.25 (s, 2H) ppm. **<sup>13</sup>C{<sup>1</sup>H} NMR** (100 MHz, CDCl<sub>3</sub>): δ 196.7, 135.3, 134.2, 132.0, 130.2, 129.4, 128.8, 128.4, 127.1, 45.6 ppm. **IR** (film): 3006, 2991, 2350, 2410, 1620, 1500, 1260, 740, 720 cm<sup>-1</sup>. **HRMS** (ESI): calculated for C<sub>14</sub>H<sub>12</sub>OBr<sup>+</sup> [M+H]<sup>+</sup> 275.0066, found 275.0065. Spectra data of this compound are consistent with literature data.<sup>[4]</sup>

#### 2.4.4 Characterization data of 1-(4-hydroxyphenyl)-2-phenylethan-1-one (**3d**)

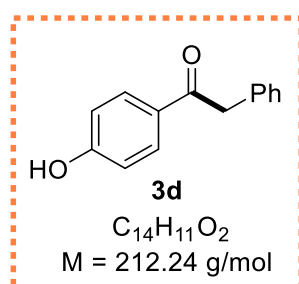

Prepared according to general procedure from CrCl<sub>2</sub> (2.5 mg, 10 mol%), 4,4'-Di-tert-butyl-2,2'-bipyridine (dtbbpy, 5.4 mg, 10 mol%), 2-(4-hydroxyphenyl)-2-oxoacetic acid (66.4 mg, 0.4 mmol, 2.0 equiv.), benzylicpyridinium salts (97.0 mg, 0.2 mmol, 1.0 equiv.), NaOAc (0.3 mmol, 1.5 equiv. 24.6 mg), 4CzIPN (2 mol%, 3.2 mg) and THF (1 mL) under blue LED (8 W, λ=450 nm) irradiation for 24 hours. Purification by preparative TLC (petroleum PE/EA = 20:1) to afford **3d** as white solid (31.4 mg, 74% yield), mp = 100-102 °C; **<sup>1</sup>H NMR** (CDCl<sub>3</sub>, 400 MHz): δ 8.02 – 7.94 (m, 2H), 7.43 – 7.32 (m, 2H), 7.32 – 7.21 (m, 3H), 6.93 – 6.85 (m, 2H), 6.03 (br, 1H, -OH), 4.24 (s, 2H), 1.31 (br, 1H). **<sup>13</sup>C{<sup>1</sup>H} NMR** (100 MHz, CDCl<sub>3</sub>): δ 196.9, 160.4, 134.9, 131.4, 129.7, 129.5, 128.8, 127.0, 115.6, 45.3 ppm. **IR** (film): 3014, 2378, 2324, 1510, 1480, 1270, 740 cm<sup>-1</sup>. **HRMS** (ESI): calculated for C<sub>14</sub>H<sub>13</sub>O<sub>2</sub><sup>+</sup> [M+H]<sup>+</sup> 213.0910, found 213.0909. Spectra data of this compound are consistent with literature data.<sup>[5]</sup>

#### 2.4.5 Characterization data of 1-(4-ethylphenyl)-2-phenylethan-1-one (**3e**)

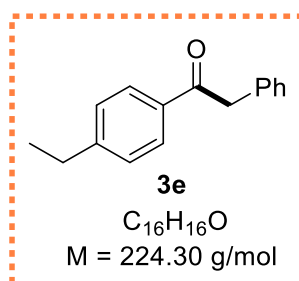

Prepared according to general procedure from CrCl<sub>2</sub> (2.5 mg, 10 mol%), 4,4'-Di-tert-butyl-2,2'-bipyridine (dtbbpy, 5.4 mg, 10 mol%), 2-(4-ethylphenyl)-2-oxoacetic acid (71.2 mg, 0.4 mmol, 2.0 equiv.), benzylicpyridinium salts (97.0 mg, 0.2 mmol, 1.0 equiv.), NaOAc (0.3 mmol, 1.5 equiv. 24.6

mg.), 4CzIPN (2 mol%, 3.2 mg) and THF (1 mL) under blue LED (8 W,  $\lambda=450$  nm) irradiation for 24 hours. Purification by preparative TLC (petroleum PE/EA = 20:1) to afford **3e** as gum (31.4 mg, 70% yield). **<sup>1</sup>H NMR** (CDCl<sub>3</sub>, 400 MHz):  $\delta$  7.97 – 7.94 (m, 2H), 7.38 – 7.21 (m, 7H), 4.27 (s, 2H), 2.71 (q, J = 7.6 Hz, 2H), 1.26 (t, J = 7.6 Hz, 3H) ppm. **<sup>13</sup>C{<sup>1</sup>H} NMR** (100 MHz, CDCl<sub>3</sub>):  $\delta$  197.4, 150.2, 134.9, 134.4, 129.5, 128.9, 128.7, 128.2, 126.9, 45.5, 29.0, 15.2 ppm. **<sup>19</sup>F NMR** (376 MHz, CDCl<sub>3</sub>)  $\delta$  -109.0 ppm. **IR** (film): 3004, 2320, 1600, 1550, 1268, 740 cm<sup>-1</sup>. **HRMS** (ESI): calculated for C<sub>16</sub>H<sub>17</sub>O<sup>+</sup> [M+H]<sup>+</sup> 225.1274, found 225.1270. Spectra data of this compound are consistent with literature data.<sup>[6]</sup>

#### 2.4.6 Characterization data of 1-(2-fluorophenyl)-2-phenylethan-1-one (**3f**)

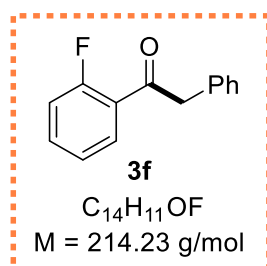

Prepared according to general procedure from CrCl<sub>2</sub> (2.5 mg, 10 mol%), 4,4'-Di-tert-butyl-2,2'-bipyridine (dtbbpy, 5.4 mg, 10 mol%), 2-(2-fluorophenyl)-2-oxoacetic acid (67.2 mg, 0.4 mmol, 2.0 equiv.), benzylicpyridinium salts (97.0 mg, 0.2 mmol, 1.0 equiv.), NaOAc (0.3 mmol, 1.5 equiv. 24.6 mg), 4CzIPN (2 mol%, 3.2 mg) and THF (1 mL) under blue LED (8 W,  $\lambda=450$  nm) irradiation for 24 hours. Purification by preparative TLC (petroleum PE/EA = 20:1) to afford **3f** as gum (24.4 mg, 57% yield). **<sup>1</sup>H NMR** (CDCl<sub>3</sub>, 400 MHz):  $\delta$  7.87 – 7.82 (m, 1H), 7.53 – 7.47 (m, 1H), 7.34 – 7.21 (m, 6H), 7.15 – 7.09 (m, 1H), 4.30 (s, 2H) ppm. **<sup>13</sup>C{<sup>1</sup>H} NMR** (100 MHz, CDCl<sub>3</sub>):  $\delta$  196.3, 161.8 (d,  $J_{C-F}$  = 254.3 Hz), 134.7 (d,  $J_{C-F}$  = 9.1 Hz), 134.1, 131.1, 129.8, 128.6, 127.0, 124.6, 116.8, 116.6, 50.0 ppm. **<sup>19</sup>F NMR** (376 MHz, CDCl<sub>3</sub>)  $\delta$  -109.01 ppm. **IR** (film): 3015, 2317, 1540, 1260, 758 cm<sup>-1</sup>. **HRMS** (ESI): calculated for C<sub>12</sub>H<sub>14</sub>OF<sup>+</sup> [M+H]<sup>+</sup> 215.0867, found 215.0866. Spectra data of this compound are consistent with literature data.<sup>[7]</sup>

#### 2.4.7 Characterization data of 1-(2-chlorophenyl)-2-phenylethan-1-one (**3g**)

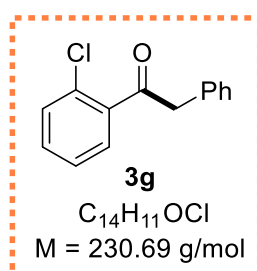

Prepared according to general procedure from CrCl<sub>2</sub> (2.5 mg, 10 mol%), 4,4'-Di-tert-butyl-2,2'-bipyridine (dtbbpy, 5.4 mg, 10 mol%), 2-(2-chlorophenyl)-2-oxoacetic acid (73.6 mg, 0.4 mmol, 2.0

equiv.), benzylicpyridinium salts (97.0 mg, 0.2 mmol, 1.0 equiv.), NaOAc (0.3 mmol, 1.5 equiv. 24.6 mg.), 4CzIPN (2 mol%, 3.2 mg) and THF (1 mL) under blue LED (8 W,  $\lambda=450$  nm) irradiation for 24 hours. Purification by preparative TLC (petroleum PE/EA = 20:1) to afford **3g** as gum (29.9 mg, 65% yield). **<sup>1</sup>H NMR** (CDCl<sub>3</sub>, 400 MHz):  $\delta$  7.48 – 7.29 (m, 3H), 7.28 – 7.22 (m, 2H), 7.22 – 6.98 (m, 4H), 4.19 (s, 2H).ppm. **<sup>13</sup>C{<sup>1</sup>H} NMR** (100 MHz, CDCl<sub>3</sub>):  $\delta$  201.0, 134.9, 133.7, 131.7, 130.5, 129.8, 129.1, 128.7, 127.2, 126.9, 49.6. **IR** (film): 3020, 2322, 1650, 1470, 1270, 750 cm<sup>-1</sup>. **HRMS** (ESI): calculated for C<sub>12</sub>H<sub>14</sub>OCl<sup>+</sup> [M+H]<sup>+</sup> 231.0571, found 231.0567. Spectra data of this compound are consistent with literature data.<sup>[7]</sup>

#### 2.4.8 Characterization data of 1-mesityl-2-phenylethan-1-one (**3h**)

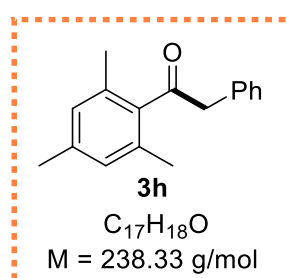

Prepared according to general procedure from CrCl<sub>2</sub> (2.5 mg, 10 mol%), 4,4'-Di-tert-butyl-2,2'-bipyridine (dtbbpy, 5.4 mg, 10 mol%), 2-mesityl-2-oxoacetic acid (76.8 mg, 0.4 mmol, 2.0 equiv.), benzylicpyridinium salts (97.0 mg, 0.2 mmol, 1.0 equiv.), NaOAc (0.3 mmol, 1.5 equiv. 24.6 mg.), 4CzIPN (2 mol%, 3.2 mg) and THF (1 mL) under blue LED (8 W,  $\lambda=450$  nm) irradiation for 24 hours. Purification by preparative TLC (petroleum PE/EA = 20:1) to afford **3h** as gum (23.8 mg, 50% yield). **<sup>1</sup>H NMR** (CDCl<sub>3</sub>, 400 MHz):  $\delta$  7.26 – 7.17 (m, 3H), 7.15 – 7.09 (m, 2H), 6.75 (s, 2H), 3.92 (s, 2H), 2.20 (s, 3H), 2.05 (s, 6H) ppm. **<sup>13</sup>C{<sup>1</sup>H} NMR** (100 MHz, CDCl<sub>3</sub>):  $\delta$  207.6, 139.2, 138.6, 133.4, 132.8, 130.0, 128.6, 128.6, 127.2, 51.9, 21.1, 19.3 ppm. **IR** (film): 3014, 2311, 1508, 1260, 730 cm<sup>-1</sup>. **HRMS** (ESI): calculated for C<sub>17</sub>H<sub>19</sub>O<sup>+</sup> [M+H]<sup>+</sup> 239.1430, found 239.1427. Spectra data of this compound are consistent with literature data.<sup>[8]</sup>

#### 2.4.9 Characterization data of 2-(4-(tert-butyl)phenyl)-1-phenylethan-1-one (**4a**)

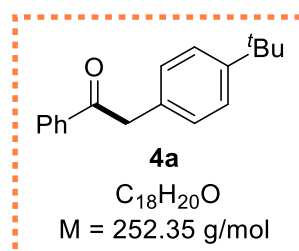

Prepared according to general procedure from CrCl<sub>2</sub> (2.5 mg, 10 mol%), 4,4'-Di-tert-butyl-2,2'-bipyridine (dtbbpy, 5.4 mg, 10 mol%),  $\alpha$ -oxo acids (60 mg, 0.4 mmol, 2.0 equiv.), benzylicpyridinium

salts (108.3 mg, 0.2 mmol, 1.0 equiv.), NaOAc (0.3 mmol, 1.5 equiv. 24.6 mg), 4CzIPN (2 mol%, 3.2 mg) and THF (1 mL) under blue LED (8 W,  $\lambda=450$  nm) irradiation for 24 hours. Purification by preparative TLC (petroleum PE/EA = 20:1) to afford **4a** as gum (35.3 mg, 70% yield). **<sup>1</sup>H NMR** (CDCl<sub>3</sub>, 400 MHz):  $\delta$  8.08 – 8.01 (m, 2H), 7.50 – 7.44 (m, 2H), 7.38 – 7.35 (m, 2H), 7.24 – 7.20 (m, 2H), 4.27 (s, 2H), 1.32 (s, 9H) ppm. **<sup>13</sup>C{<sup>1</sup>H} NMR** (100 MHz, CDCl<sub>3</sub>):  $\delta$  197.9, 149.8, 136.8, 133.2, 131.5, 130.0, 129.2, 128.7, 125.7, 45.0, 34.5, 31.4 ppm. **IR** (film): 3081, 3014, 2370, 1620, 1247, 720 cm<sup>-1</sup>. **HRMS** (ESI): calculated for C<sub>18</sub>H<sub>21</sub>O<sup>+</sup> [M+H]<sup>+</sup> 253.1587, found 253.1584. Spectra data of this compound are consistent with literature data.<sup>[9]</sup>

#### 2.4.10 Characterization data of 1-phenyl-2-(4-(trifluoromethoxy)phenyl)ethan-1-one (**4b**)

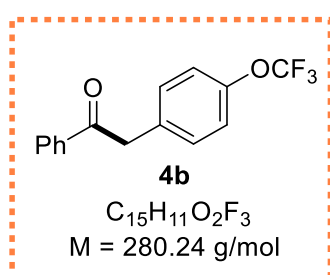

Prepared according to general procedure from CrCl<sub>2</sub> (2.5 mg, 10 mol%), 4,4'-Di-tert-butyl-2,2'-bipyridine (dtbbpy, 5.4 mg, 10 mol%),  $\alpha$ -oxo acids (60 mg, 0.4 mmol, 2.0 equiv.), benzylicpyridinium salts (113.8 mg, 0.2 mmol, 1.0 equiv.), NaOAc (0.3 mmol, 1.5 equiv. 24.6 mg), 4CzIPN (2 mol%, 3.2 mg) and THF (1 mL) under blue LED (8 W,  $\lambda=450$  nm) irradiation for 24 hours. Purification by preparative TLC (petroleum PE/EA = 20:1) to afford **4b** as white solid (40.3 mg, 72% yield), mp = 100-101 °C. **<sup>1</sup>H NMR** (CDCl<sub>3</sub>, 400 MHz):  $\delta$  8.03 – 7.98 (m, 2H), 7.62 – 7.53 (m, 1H), 7.51 – 7.43 (m, 2H), 7.31 – 7.26 (m, 2H), 7.21 – 7.14 (m, 2H), 4.29 (s, 2H) ppm. **<sup>13</sup>C{<sup>1</sup>H} NMR** (100 MHz, CDCl<sub>3</sub>):  $\delta$  197.1, 148.3, 136.5, 133.5, 133.3, 131.0, 128.8, 128.6, 121.2, 44.6 ppm. **<sup>19</sup>F NMR** (376 MHz, CDCl<sub>3</sub>)  $\delta$  -57.8 ppm. **IR** (film): 3028, 2328, 1700, 1271, 765, 751 cm<sup>-1</sup>. **HRMS** (ESI): calculated for C<sub>15</sub>H<sub>12</sub>O<sub>2</sub>F<sub>3</sub><sup>+</sup> [M+H]<sup>+</sup> 281.0784, found 281.0778.

#### 2.4.11 Characterization data of 2-(4-iodophenyl)-1-phenylethan-1-one (**4c**)

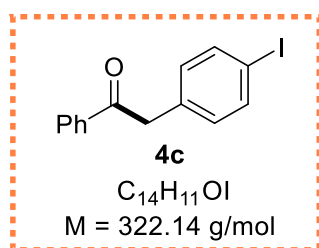

Prepared according to general procedure from CrCl<sub>2</sub> (2.5 mg, 10 mol%), 4,4'-Di-tert-butyl-2,2'-bipyridine (dtbbpy, 5.4 mg, 10 mol%),  $\alpha$ -oxo acids (60 mg, 0.4 mmol, 2.0 equiv.), benzylicpyridinium salts (122.2 mg, 0.2 mmol, 1.0 equiv.), NaOAc (0.3 mmol, 1.5 equiv. 24.6 mg), 4CzIPN (2 mol%, 3.2



mg) and THF (1 mL) under blue LED (8 W,  $\lambda=450$  nm) irradiation for 24 hours. Purification by preparative TLC (petroleum PE/EA = 20:1) to afford **4c** as white solid (46.3 mg, 72% yield), mp = 130-132 °C. **<sup>1</sup>H NMR** (CDCl<sub>3</sub>, 400 MHz):  $\delta$  8.02 – 7.97 (m, 2H), 7.69 – 7.61 (m, 2H), 7.57 (t, J = 7.4 Hz, 1H), 7.49 – 7.43 (m, 2H), 7.03 – 6.99 (m, 2H), 4.22 (s, 2H) ppm. **<sup>13</sup>C{<sup>1</sup>H} NMR** (100 MHz, CDCl<sub>3</sub>):  $\delta$  197.1, 137.8, 136.5, 134.2, 133.5, 131.6, 128.8, 128.6, 92.5, 45.0 ppm. **IR** (film): 3018, 2350, 1602, 1280, 749, 540 cm<sup>-1</sup>. **HRMS** (ESI): calculated for C<sub>14</sub>H<sub>12</sub>OI<sup>+</sup> [M+H]<sup>+</sup> 322.9927, found 322.9918. Spectra data of this compound are consistent with literature data.<sup>[10]</sup>

#### 2.4.12 Characterization data of 1-phenyl-2-(4-(trifluoromethyl)phenyl)ethan-1-one (**4d**)

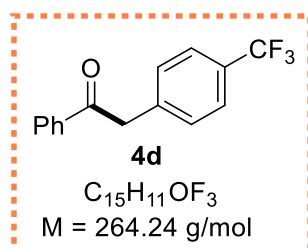

Prepared according to general procedure from CrCl<sub>2</sub> (2.5 mg, 10 mol%), 4,4'-Di-tert-butyl-2,2'-bipyridine (dtbbpy, 5.4 mg, 10 mol%),  $\alpha$ -oxo acids (60 mg, 0.4 mmol, 2.0 equiv.), benzylicpyridinium salts (110.6 mg, 0.2 mmol, 1.0 equiv.), NaOAc (0.3 mmol, 1.5 equiv. 24.6 mg), 4CzIPN (2 mol%, 3.2 mg) and THF (1 mL) under blue LED (8 W,  $\lambda=450$  nm) irradiation for 24 hours. Purification by preparative TLC (petroleum PE/EA = 20:1) to afford **4d** as white solid (36.9 mg, 70% yield), mp = 130-132 °C. **<sup>1</sup>H NMR** (CDCl<sub>3</sub>, 400 MHz):  $\delta$  8.04 – 8.00 (m, 2H), 7.63 – 7.56 (m, 3H), 7.53 – 7.45 (m, 2H), 7.41 – 7.36 (m, 2H), 4.36 (s, 2H) ppm. **<sup>13</sup>C{<sup>1</sup>H} NMR** (100 MHz, CDCl<sub>3</sub>):  $\delta$  196.7, 138.6, 136.4, 135.0, 133.6, 130.1, 129.1, 128.9, 128.6, 125.6 (q, J = 3.9 Hz), 45.1 ppm. **<sup>19</sup>F NMR** (376 MHz, CDCl<sub>3</sub>)  $\delta$  -62.5 ppm. **IR** (film): 3013, 2369, 1670, 1240, 1102, 750 cm<sup>-1</sup>. **HRMS** (ESI): calculated for C<sub>15</sub>H<sub>12</sub>OF<sub>3</sub><sup>+</sup> [M+H]<sup>+</sup> 265.0835, found 265.0827. Spectra data of this compound are consistent with literature data.<sup>[8]</sup>

#### 2.4.13 Characterization data of 4-(2-oxo-2-phenylethyl)benzonitrile (**4e**)

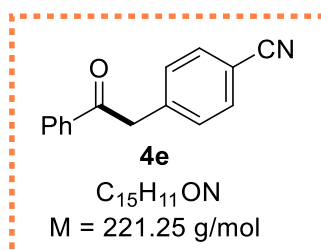

Prepared according to general procedure from CrCl<sub>2</sub> (2.5 mg, 10 mol%), 4,4'-Di-tert-butyl-2,2'-bipyridine (dtbbpy, 5.4 mg, 10 mol%),  $\alpha$ -oxo acids (60 mg, 0.4 mmol, 2.0 equiv.), benzylicpyridinium salts (102.0 mg, 0.2 mmol, 1.0 equiv.), NaOAc (0.3 mmol, 1.5 equiv. 24.6 mg), 4CzIPN (2 mol%, 3.2 mg) and THF (1 mL) under blue LED (8 W,  $\lambda=450$  nm) irradiation for 24 hours. Purification by

preparative TLC (petroleum PE/EA = 20:1) to afford **4e** as white solid (24.3 mg, 55% yield), mp = 150-153 °C. **<sup>1</sup>H NMR** (CDCl<sub>3</sub>, 400 MHz): δ 8.02 – 7.98 (m, 2H), 7.66 – 7.56 (m, 3H), 7.52 – 7.47 (m, 2H), 7.39 – 7.36 (m, 2H), 4.36 (s, 2H) ppm. **<sup>13</sup>C{<sup>1</sup>H} NMR** (100 MHz, CDCl<sub>3</sub>): δ 196.2, 140.1, 136.3, 133.8, 132.4, 130.6, 128.9, 128.5, 118.9, 111.0, 45.3 ppm. **IR** (film): 3027, 2318, 1721, 1533, 1275, 740 cm<sup>-1</sup>. **HRMS** (ESI): calculated for C<sub>15</sub>H<sub>12</sub>NO<sup>+</sup> [M+H]<sup>+</sup> 222.0913, found 222.0906. Spectra data of this compound are consistent with literature data.<sup>[8]</sup>

#### 2.4.14 Characterization data of 2-([1,1'-biphenyl]-4-yl)-1-phenylethan-1-one (**4f**)

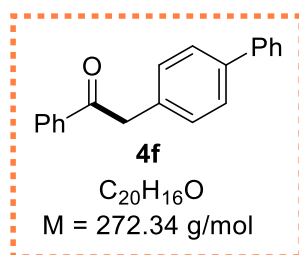

Prepared according to general procedure from CrCl<sub>2</sub> (2.5 mg, 10 mol%), 4,4'-Di-tert-butyl-2,2'-bipyridine (dtbbpy, 5.4 mg, 10 mol%), α-oxo acids (60 mg, 0.4 mmol, 2.0 equiv.), benzylicpyridinium salts (112.2 mg, 0.2 mmol, 1.0 equiv.), NaOAc (0.3 mmol, 1.5 equiv. 24.6 mg,) 4CzIPN (2 mol%, 3.2 mg) and THF (1 mL) under blue LED (8 W, λ=450 nm) irradiation for 24 hours. Purification by preparative TLC (petroleum PE/EA = 20:1) to afford **4f** as white solid (38.1 mg, 70% yield), mp = 218-220 °C. **<sup>1</sup>H NMR** (CDCl<sub>3</sub>, 400 MHz): δ 8.09 – 8.02 (m, 2H), 7.60 – 7.54 (m, 5H), 7.50 – 7.41 (m, 4H), 7.37 – 7.32 (m, 3H), 4.34 (s, 2H) ppm. **<sup>13</sup>C{<sup>1</sup>H} NMR** (100 MHz, CDCl<sub>3</sub>): δ 197.7, 140.9, 140.0, 136.7, 133.6, 133.3, 130.0, 128.8, 128.8, 128.7, 127.5, 127.3, 127.2, 45.2 ppm. **IR** (film): 3030, 2324, 1705, 1515, 1230, 710 cm<sup>-1</sup>. **HRMS** (ESI): calculated for C<sub>20</sub>H<sub>17</sub>O<sup>+</sup> [M+H]<sup>+</sup> 273.1274, found 273.1270. Spectra data of this compound are consistent with literature data.<sup>[11]</sup>

#### 2.4.15 Characterization data of 2-([1,1'-biphenyl]-4-yl)-1-phenylethan-1-one (**4g**)

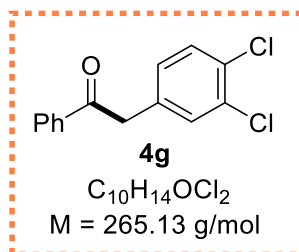

Prepared according to general procedure from CrCl<sub>2</sub> (2.5 mg, 10 mol%), 4,4'-Di-tert-butyl-2,2'-bipyridine (dtbbpy, 5.4 mg, 10 mol%), α-oxo acids (60 mg, 0.4 mmol, 2.0 equiv.), benzylicpyridinium salts (126.0 mg, 0.2 mmol, 1.0 equiv.), NaOAc (0.3 mmol, 1.5 equiv. 24.6 mg,) 4CzIPN (2 mol%, 3.2 mg) and THF (1 mL) under blue LED (8 W, λ=450 nm) irradiation for 24 hours. Purification by preparative TLC (petroleum PE/EA = 20:1) to afford **4g** as white solid (34.4 mg, 65% yield), mp = 70-



71 °C. **<sup>1</sup>H NMR** (CDCl<sub>3</sub>, 400 MHz): δ 8.01 – 7.98 (m, 2H), 7.61 – 7.57 (m, 1H), 7.49 (dd, J = 8.3, 7.0 Hz, 2H), 7.42 – 7.33 (m, 2H), 7.10 (dd, J = 8.2, 2.1 Hz, 1H), 4.25 (s, 2H) ppm. **<sup>13</sup>C{<sup>1</sup>H} NMR** (100 MHz, CDCl<sub>3</sub>): 196.5, 136.3, 134.7, 133.6, 132.6, 131.6, 131.2, 130.5, 129.2, 128.9, 128.5, 44.3 ppm. **IR** (film): 3005, 2991, 2379, 2317, 1261, 750 cm<sup>-1</sup>. **HRMS** (ESI): calculated for C<sub>14</sub>H<sub>11</sub>OCl<sub>2</sub><sup>+</sup> [M+H]<sup>+</sup> 265.0181, found 265.0177. Spectra data of this compound are consistent with literature data.<sup>[12]</sup>

#### 2.4.16 Characterization data of 2-(3-fluorophenyl)-1-phenylethan-1-one (**4h**)

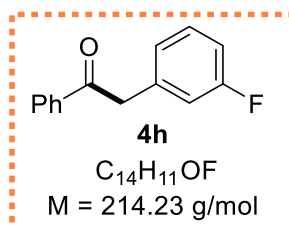

Prepared according to general procedure from CrCl<sub>2</sub> (2.5 mg, 10 mol%), 4,4'-Di-tert-butyl-2,2'-bipyridine (dtbbpy, 5.4 mg, 10 mol%), α-oxo acids (60 mg, 0.4 mmol, 2.0 equiv.), benzylicpyridinium salts (115.8 mg, 0.2 mmol, 1.0 equiv.), NaOAc (0.3 mmol, 1.5 equiv. 24.6 mg), 4CzIPN (2 mol%, 3.2 mg) and THF (1 mL) under blue LED (8 W, λ=450 nm) irradiation for 24 hours. Purification by preparative TLC (petroleum PE/EA = 20:1) to afford **4h** as gum (25.7 mg, 60% yield). **<sup>1</sup>H NMR** (CDCl<sub>3</sub>, 400 MHz): δ 8.02 – 7.99 (m, 2H), 7.60 – 7.55 (m, 1H), 7.50 – 7.45 (m, 2H), 7.32 – 7.26 (m, 1H), 7.09 – 6.91 (m, 3H), 4.28 (s, 2H) ppm. **<sup>13</sup>C{<sup>1</sup>H} NMR** (100 MHz, CDCl<sub>3</sub>): δ 197.0, 163.0 (d, J<sub>C-F</sub> = 246.1 Hz), 136.9 (d, J<sub>C-F</sub> = 7.7 Hz), 136.5, 133.4, 130.1 (d, J<sub>C-F</sub> = 8.5 Hz), 128.8, 128.6, 125.3, 116.6 (d, J<sub>C-F</sub> = 21.8 Hz), 114.0 (d, J<sub>C-F</sub> = 21.1 Hz), 45.1 ppm. **<sup>19</sup>F NMR** (376 MHz, CDCl<sub>3</sub>) δ -113.0 (s, 1F) ppm. **IR** (film): 3004, 2970, 2370, 2331, 1508, 1266, 700 cm<sup>-1</sup>. **HRMS** (ESI): calculated for C<sub>14</sub>H<sub>12</sub>O<sup>+</sup> [M+H]<sup>+</sup> 215.0867, found 265.0860. Spectra data of this compound are consistent with literature data.<sup>[13]</sup>

#### 2.4.17 Characterization data of 2-(3-methoxyphenyl)-1-phenylethan-1-one (**4i**)

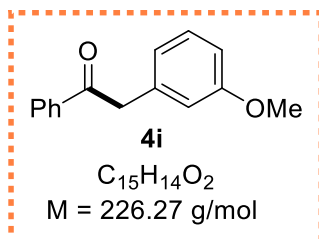

Prepared according to general procedure from CrCl<sub>2</sub> (2.5 mg, 10 mol%), 4,4'-Di-tert-butyl-2,2'-bipyridine (dtbbpy, 5.4 mg, 10 mol%), α-oxo acids (60 mg, 0.4 mmol, 2.0 equiv.), benzylicpyridinium salts (118.3 mg, 0.2 mmol, 1.0 equiv.), NaOAc (0.3 mmol, 1.5 equiv. 24.6 mg), 4CzIPN (2 mol%, 3.2 mg) and THF (1 mL) under blue LED (8 W, λ=450 nm) irradiation for 24 hours. Purification by preparative TLC (petroleum PE/EA = 20:1) to afford **4i** as gum (36.2 mg, 80% yield). **<sup>1</sup>H NMR** (CDCl<sub>3</sub>,

400 MHz):  $\delta$  8.04 – 8.00 (m, 2H), 7.58 – 7.53 (m, 1H), 7.49 – 7.43 (m, 2H), 7.25 (t,  $J = 7.8$  Hz, 1H), 6.90 – 6.74 (m, 3H), 4.26 (s, 2H), 3.78 (s, 3H) ppm.  $^{13}\text{C}\{^1\text{H}\}$  NMR (100 MHz,  $\text{CDCl}_3$ ):  $\delta$  197.6, 159.9, 136.6, 136.1, 133.2, 129.7, 128.7, 128.7, 121.9, 115.2, 112.4, 55.2, 45.6 ppm. IR (film): 3029, 2336, 1633, 1274, 884, 710  $\text{cm}^{-1}$ . HRMS (ESI): calculated for  $\text{C}_{15}\text{H}_{15}\text{O}_2^+$   $[\text{M}+\text{H}]^+$  227.1067, found 227.1063. Spectra data of this compound are consistent with literature data.<sup>[13]</sup>

#### 2.4.18 Characterization data of 1-phenyl-2-(*o*-tolyl)ethan-1-one (**4j**)

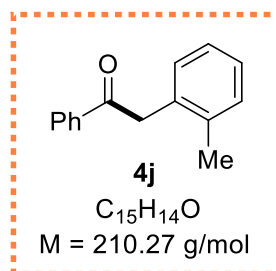

Prepared according to general procedure from  $\text{CrCl}_2$  (2.5 mg, 10 mol%), 4,4'-Di-*tert*-butyl-2,2'-bipyridine (dtbbpy, 5.4 mg, 10 mol%),  $\alpha$ -oxo acids (60 mg, 0.4 mmol, 2.0 equiv.), benzylicpyridinium salts (115.0 mg, 0.2 mmol, 1.0 equiv.), NaOAc (0.3 mmol, 1.5 equiv. 24.6 mg,) 4CzIPN (2 mol%, 3.2 mg) and THF (1 mL) under blue LED (8 W,  $\lambda=450$  nm) irradiation for 24 hours. Purification by preparative TLC (petroleum PE/EA = 20:1) to afford **4j** as white solid (31.1 mg, 74% yield), mp = 55-57  $^\circ\text{C}$ .  $^1\text{H}$  NMR ( $\text{CDCl}_3$ , 400 MHz):  $\delta$  8.07 – 8.03 (m, 2H), 7.64 – 7.55 (m, 1H), 7.52 – 7.47 (m, 2H), 7.29 – 7.10 (m, 4H), 4.33 (s, 2H), 2.29 (s, 3H) ppm.  $^{13}\text{C}\{^1\text{H}\}$  NMR (100 MHz,  $\text{CDCl}_3$ ):  $\delta$  197.5, 136.9, 133.5, 133.2, 130.4, 130.3, 128.7, 128.4, 128.3, 127.3, 126.2, 43.5, 19.8 ppm. IR (film): 2989, 2300, 1602, 1527, 1233, 699  $\text{cm}^{-1}$ . HRMS (ESI): calculated for  $\text{C}_{15}\text{H}_{15}\text{O}^+$   $[\text{M}+\text{H}]^+$  211.1117, found 211.1115. Spectra data of this compound are consistent with literature data.<sup>[13]</sup>

#### 2.4.19 Characterization data of 2-(2-bromophenyl)-1-phenylethan-1-one (**4k**)

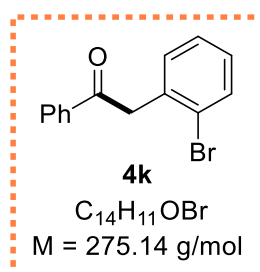

Prepared according to general procedure from  $\text{CrCl}_2$  (2.5 mg, 10 mol%), 4,4'-Di-*tert*-butyl-2,2'-bipyridine (dtbbpy, 5.4 mg, 10 mol%),  $\alpha$ -oxo acids (60 mg, 0.4 mmol, 2.0 equiv.), benzylicpyridinium salts (128.0 mg, 0.2 mmol, 1.0 equiv.), NaOAc (0.3 mmol, 1.5 equiv. 24.6 mg,) 4CzIPN (2 mol%, 3.2 mg) and THF (1 mL) under blue LED (8 W,  $\lambda=450$  nm) irradiation for 24 hours. Purification by preparative TLC (petroleum PE/EA = 20:1) to afford **4k** as white solid (40.7 mg, 72% yield), mp = 59-61

°C. **<sup>1</sup>H NMR** (CDCl<sub>3</sub>, 400 MHz): δ 8.06 – 8.02 (m, 2H), 7.64 – 7.53 (m, 2H), 7.50 – 7.45 (m, 2H), 7.29 – 7.22 (m, 2H), 7.16 – 7.11 (m, 1H), 4.44 (s, 2H) ppm. **<sup>13</sup>C{<sup>1</sup>H} NMR** (100 MHz, CDCl<sub>3</sub>): δ 196.4, 136.7, 135.1, 133.4, 132.9, 131.8, 128.8, 128.8, 128.4, 127.6, 125.2, 45.8 ppm. **IR** (film): 3030, 2340, 1759, 1672, 1658, 1289, 810 cm<sup>-1</sup>. **HRMS** (ESI): calculated for C<sub>14</sub>H<sub>12</sub>OBr<sup>+</sup> [M+H]<sup>+</sup> 275.0066, found 275.0060. Spectra data of this compound are consistent with literature data.<sup>[14]</sup>

#### 2.4.20 Characterization data of 2-(naphthalen-1-yl)-1-phenylethan-1-one (**4I**)

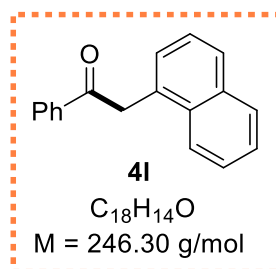

Prepared according to general procedure from CrCl<sub>2</sub> (2.5 mg, 10 mol%), 4,4'-Di-tert-butyl-2,2'-bipyridine (dtbbpy, 5.4 mg, 10 mol%), α-oxo acids (60 mg, 0.4 mmol, 2.0 equiv.), benzylicpyridinium salts (122.2 mg, 0.2 mmol, 1.0 equiv.), NaOAc (0.3 mmol, 1.5 equiv. 24.6 mg,), 4CzIPN (2 mol%, 3.2 mg) and THF (1 mL) under blue LED (8 W, λ=450 nm) irradiation for 24 hours. Purification by preparative TLC (petroleum PE/EA = 20:1) to afford **4I** as white solid (29.5 mg, 60% yield), mp = 90-92 °C. **<sup>1</sup>H NMR** (CDCl<sub>3</sub>, 400 MHz): δ 8.13 – 8.06 (m, 2H), 7.92 – 7.86 (m, 2H), 7.84 – 7.78 (m, 1H), 7.63 – 7.56 (m, 1H), 7.55 – 7.42 (m, 5H), 7.39 – 7.35 (m, 1H), 4.75 (s, 2H) ppm. **<sup>13</sup>C{<sup>1</sup>H} NMR** (100 MHz, CDCl<sub>3</sub>): δ 197.7, 136.8, 134.0, 133.3, 132.3, 131.4, 128.9, 128.8, 128.6, 128.1, 128.0, 126.4, 125.8, 125.5, 123.9, 43.2 ppm. **IR** (film): 3017, 2340, 1536, 1269, 1100, 750, 680 cm<sup>-1</sup>. **HRMS** (ESI): calculated for C<sub>18</sub>H<sub>15</sub>O<sup>+</sup> [M+H]<sup>+</sup> 247.1117, found 2471113. Spectra data of this compound are consistent with literature data.<sup>[9]</sup>

---

### 3. Computational Investigations

#### 3.1 Computational Details

All calculations were performed with the Gaussian 16 package.<sup>[15]</sup> The 3D structures of the optimized species were generated using CYLview.<sup>[16]</sup> Geometry optimizations and frequencies calculations of the reactants, transition states, intermediates and products were performed by using the UB3LYP method.<sup>[17]</sup> The LANL2DZ basis set is employed for the chromium atom,<sup>[18]</sup> and the 6-31G(d,p) basis set is used for all the other atoms. Intrinsic reaction coordinate calculations are performed to confirm that each transition state connects with the desired reactants and products.<sup>[19]</sup> To get more accurate energies, single-point energy calculations were done with the UB3LYP(BJ)-D3 functional in conjugation with solvent model density (SMD) for tetraHydrofuran.<sup>[20]</sup> The SDD basis set is employed for the chromium atom,<sup>[21]</sup> and the cc-PVTZ basis set is used for all the other atoms. On the basis of previous work,<sup>[22]</sup> an active quartet anionic Cr<sup>I</sup>Cl<sub>2</sub>/dtbbpy (LCr<sup>I</sup>Cl<sub>2</sub>) catalyst is considered as the ground-states. Vertical excited energies were calculated by time-dependent density function theory (TD-DFT) calculations at the B3LYP-D3(SMD-THF)/cc-PVTZ level of theory.<sup>[23]</sup>

The barrier heights of single electron transfer steps were calculated by using Marcus-Hush theory.<sup>[24]</sup> The free energy barrier of a single electron transfer process of outer-sphere electron transfer can be applied according to the following equation:

$$\Delta G_{ET}^{\ddagger} = \frac{(\Delta G_r + \lambda)^2}{4\lambda}$$

Where  $\Delta G_r$  is the Gibbs free energy change of the studied single electron transfer step,  $\lambda$  is the reorganization energy which includes two components, inner reorganization energy ( $\lambda_i$ ) and outer reorganization energy ( $\lambda_o$ ). The outer-sphere electron transfer model is applicable and the activation barrier may be estimated from the outer-sphere Marcus-Hush model. Since the inner reorganization energies are usually small and could be neglected. Thus, the total reorganization energy  $\lambda \approx \lambda_o$ .

$$\lambda = \lambda_o = 332 \left( \frac{1}{2a_1} + \frac{1}{2a_2} - \frac{1}{R} \right) \left( \frac{1}{\epsilon_{opt}} - \frac{1}{\epsilon} \right)$$

Where,  $a_1$  and  $a_2$  are the radii of donor and acceptor,  $R$  is the sum of  $a_1$  and  $a_2$ ,  $\epsilon_{opt}$  and  $\epsilon$  is the optical dielectric constant and static dielectric constant of solvent respectively (for THF  $\epsilon_{opt} = 1.98$ ,  $\epsilon = 7.43$ ).  $a_1$  and  $a_2$  are calculated by using Multiwfn package.<sup>[25]</sup>

**Table S2.** Calculated free energy barriers ( $\Delta G_{ET}^\ddagger$ , kcal/mol) of single electron transfer steps and their relevant parameters.

| entry | $a_1$ (Å) | $a_2$ (Å) | R (Å) | $\lambda$ | $\Delta G_r$ | $\Delta G_{ET}^\ddagger$ |
|-------|-----------|-----------|-------|-----------|--------------|--------------------------|
| SET1  | 4.92      | 8.69      | 13.61 | 10.59     | -37.2        | 16.7                     |
| SET2  | 8.69      | 8.17      | 16.86 | 7.57      | -1.1         | 1.3                      |
| SET3  | 4.92      | 8.17      | 13.09 | 10.64     | 19.2         | 20.9                     |
| SET4  | 8.69      | 7.02      | 15.71 | 8.79      | 7.7          | 7.8                      |

### 3.2 Computational fragmentation mechanism of the radical anion the $2a^{\cdot-}$

The fragmentation of the radical anion the  $2a^{\cdot-}$  proceeded through transition state  $TS^\ddagger$  with the barrier height of 13.2 kcal/mol. This step is exergonic by 12.6 kcal/mol (with respect to  $2a^{\cdot-}$ ).

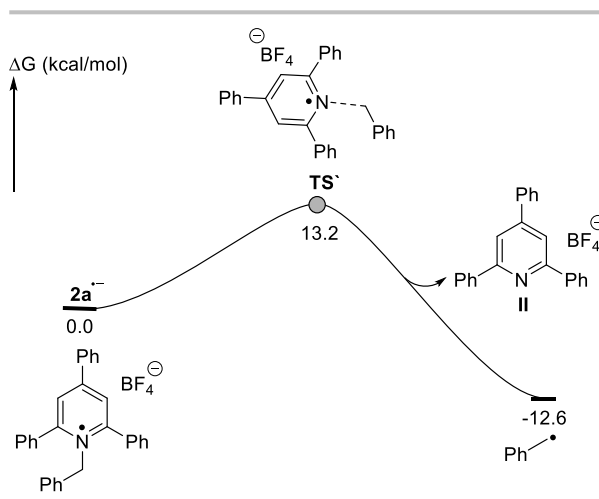

**Figure S3.** calculated Gibbs energy profile of fragmentation mechanism of the radical anion the  $2a^{\cdot-}$ .

### 3.3 Single electron transfer from the $\alpha$ -oxocarboxylate I to pyridinium salt $2a$ (SET3)

When the absence of photocatalyst, photocatalytic cycle maybe proceeded through the direct single electron transfer (SET3) from the  $\alpha$ -oxocarboxylate I to pyridinium salt  $2a$ , leading to the radical anion  $2a^{\cdot-}$ , benzoyl radical and  $CO_2$ . As shown below, the calculated barrier height of SET3 was 20.9 kcal/mol, which indicate the SET3 step was possible. Overall, these calculated results were qualitative agreement with the experimental data (the yield of  $3a$ , 35% without photocatalyst, and ~78% using 4CzIPN as photocatalyst).

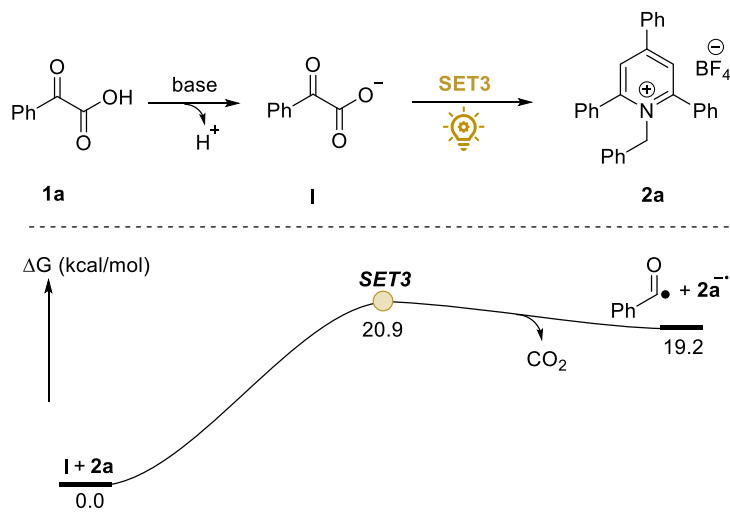

### 3.4 Single electron transfer from the reduced 4CzIPN<sup>•-</sup> to CrCl<sub>2</sub>/dtbbpy by photocatalysis (SET4)

The barrier height of single electron transfer from 4CzIPN<sup>•-</sup> to CrCl<sub>2</sub>/dtbbpy is 7.8 kcal/mol.

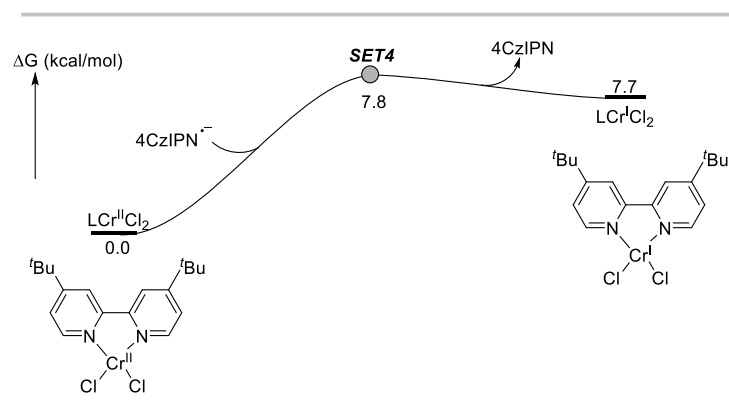

Figure S4

## 4. NMR Spectra

$^1\text{H}$  NMR spectrum (400 MHz,  $\text{CDCl}_3$ ) of compound **3a**.

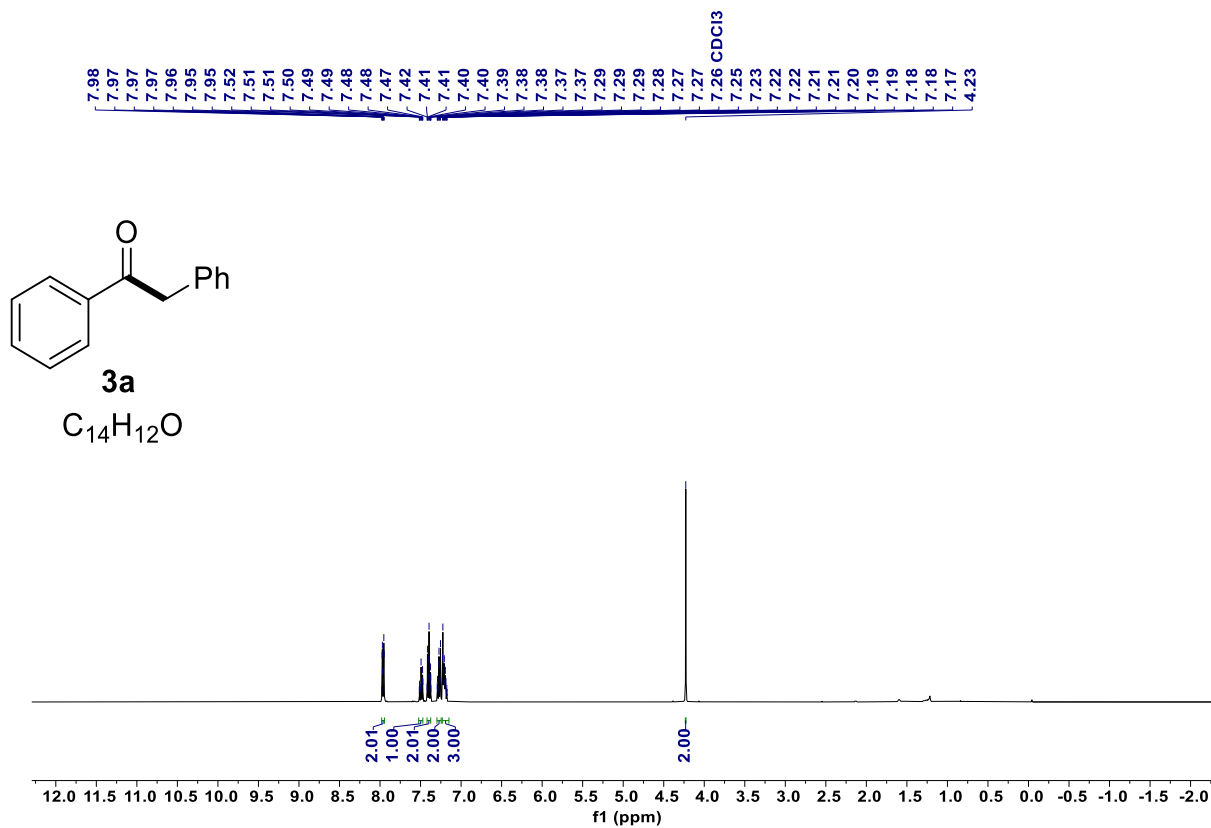

$^{13}\text{C}\{^1\text{H}\}$  NMR spectrum (100 MHz,  $\text{CDCl}_3$ ) of compound **3a**.

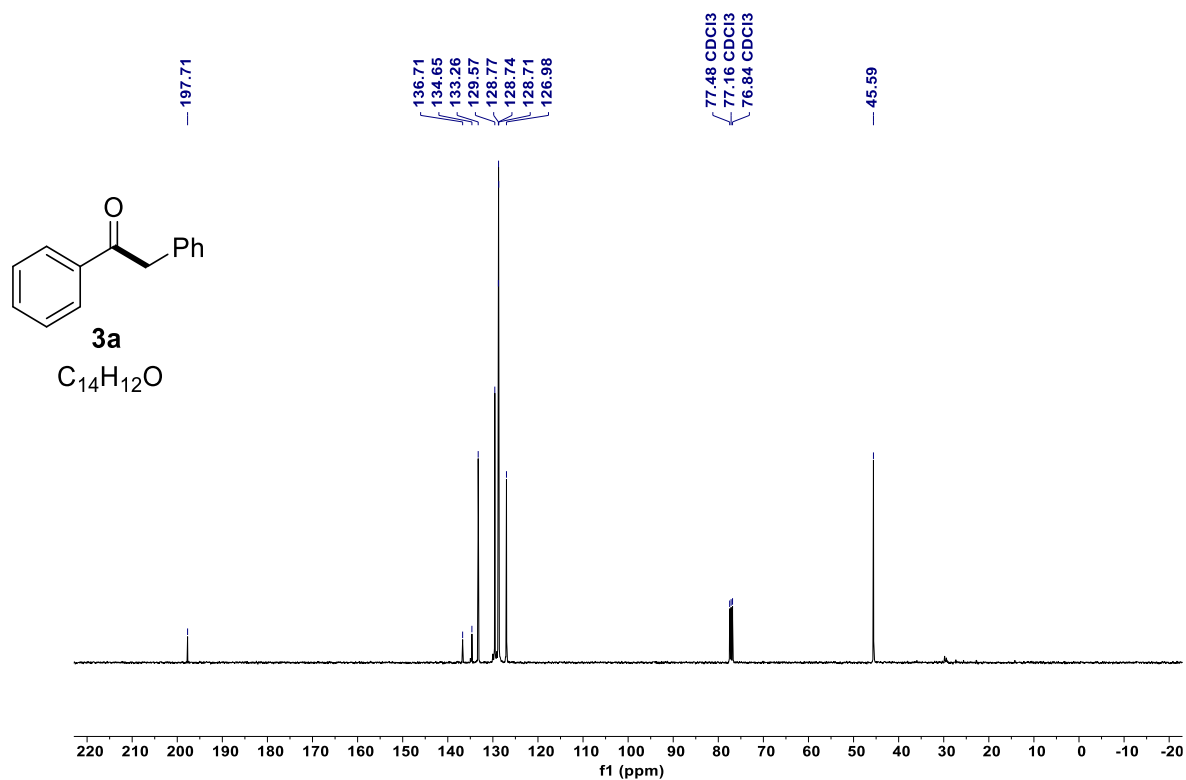

<sup>1</sup>H NMR spectrum (400 MHz, CDCl<sub>3</sub>) of compound **3b**.

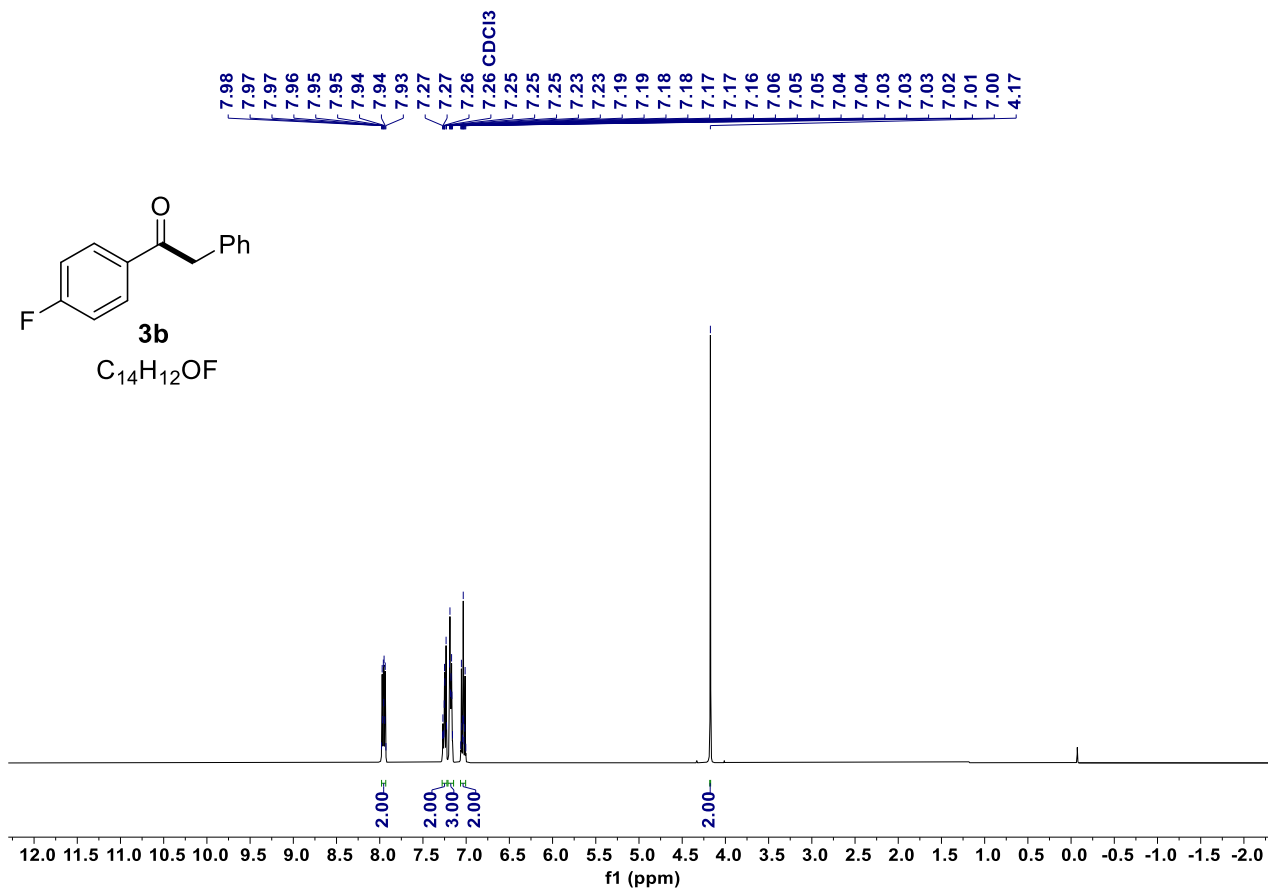

<sup>13</sup>C{<sup>1</sup>H} NMR spectrum (100 MHz, CDCl<sub>3</sub>) of compound **3b**.

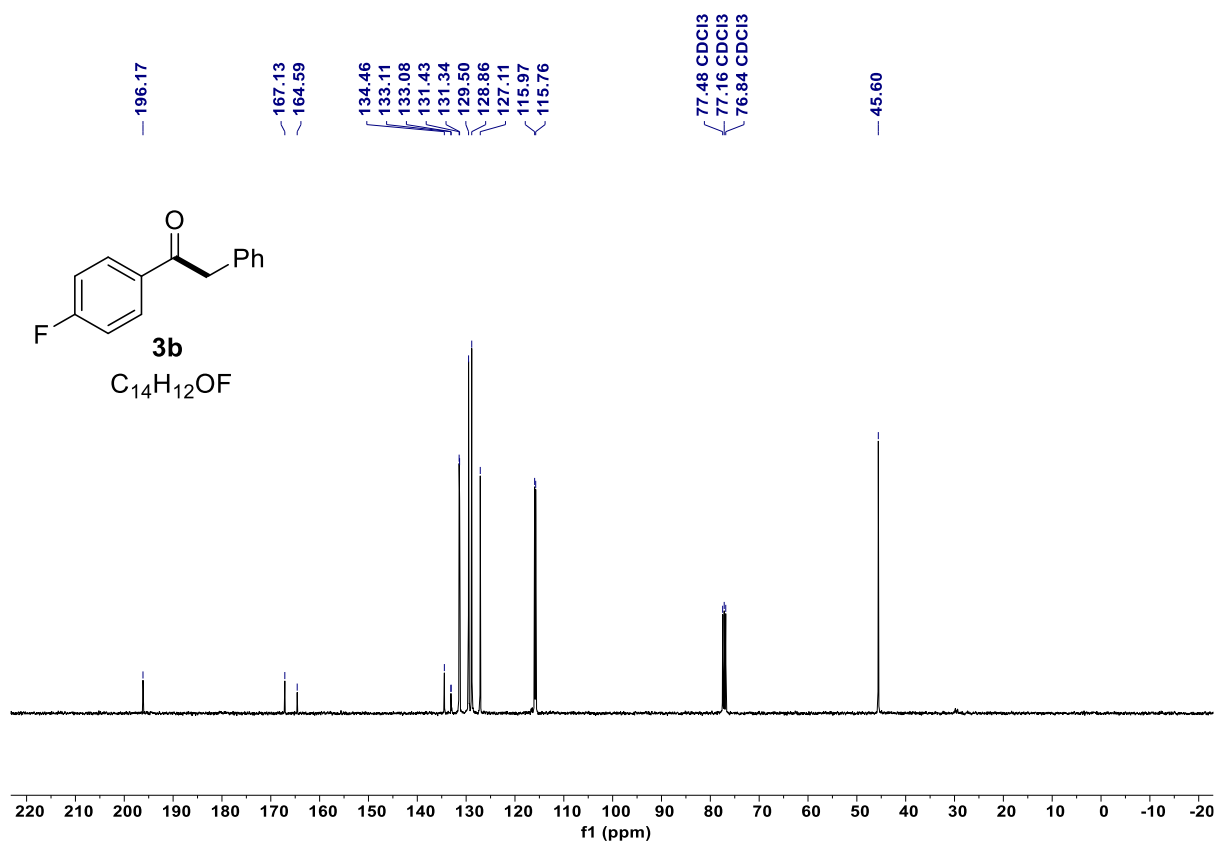



<sup>19</sup>F NMR spectrum (CDCl<sub>3</sub>, 376 MHz) of the compound **3b**

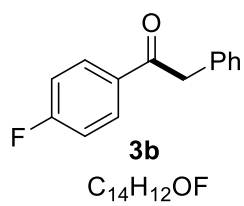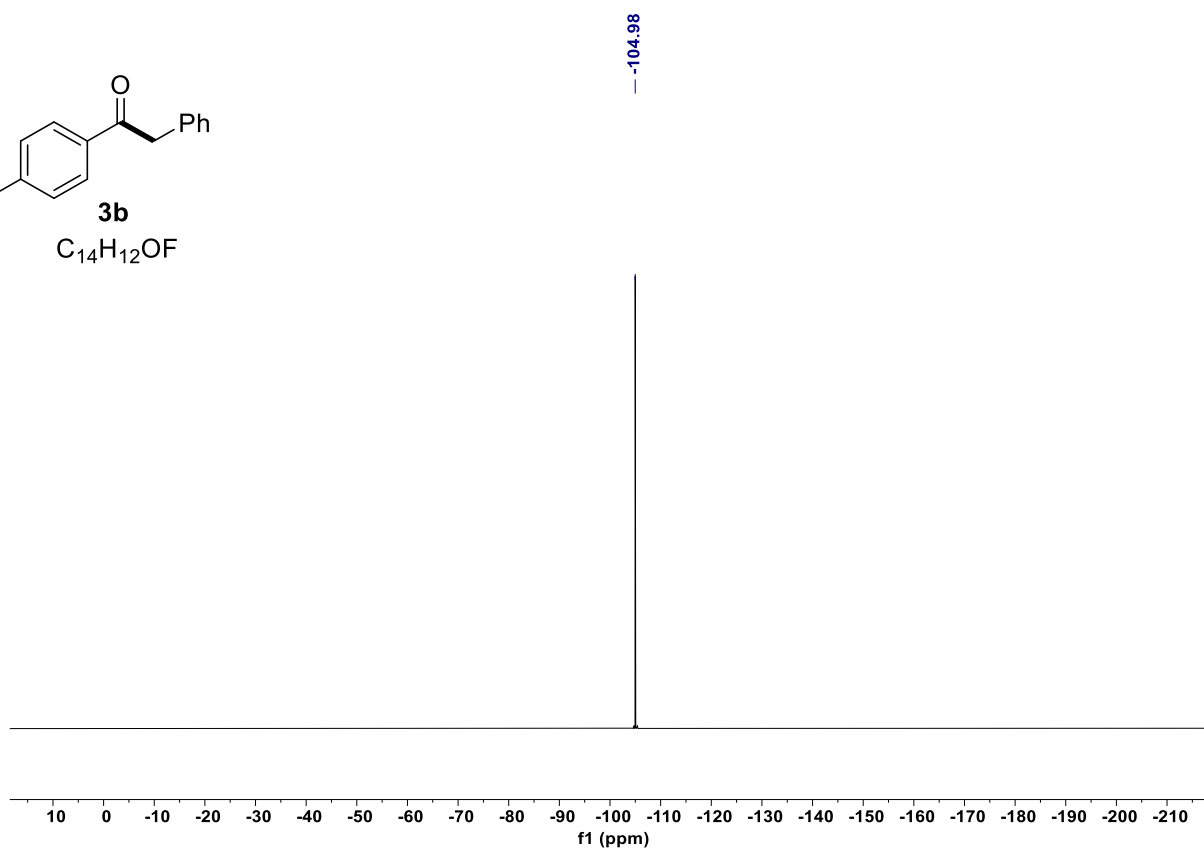

<sup>1</sup>H NMR spectrum (400 MHz, CDCl<sub>3</sub>) of compound **3c**.

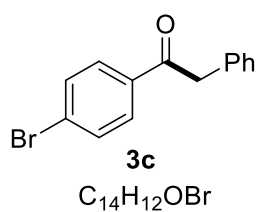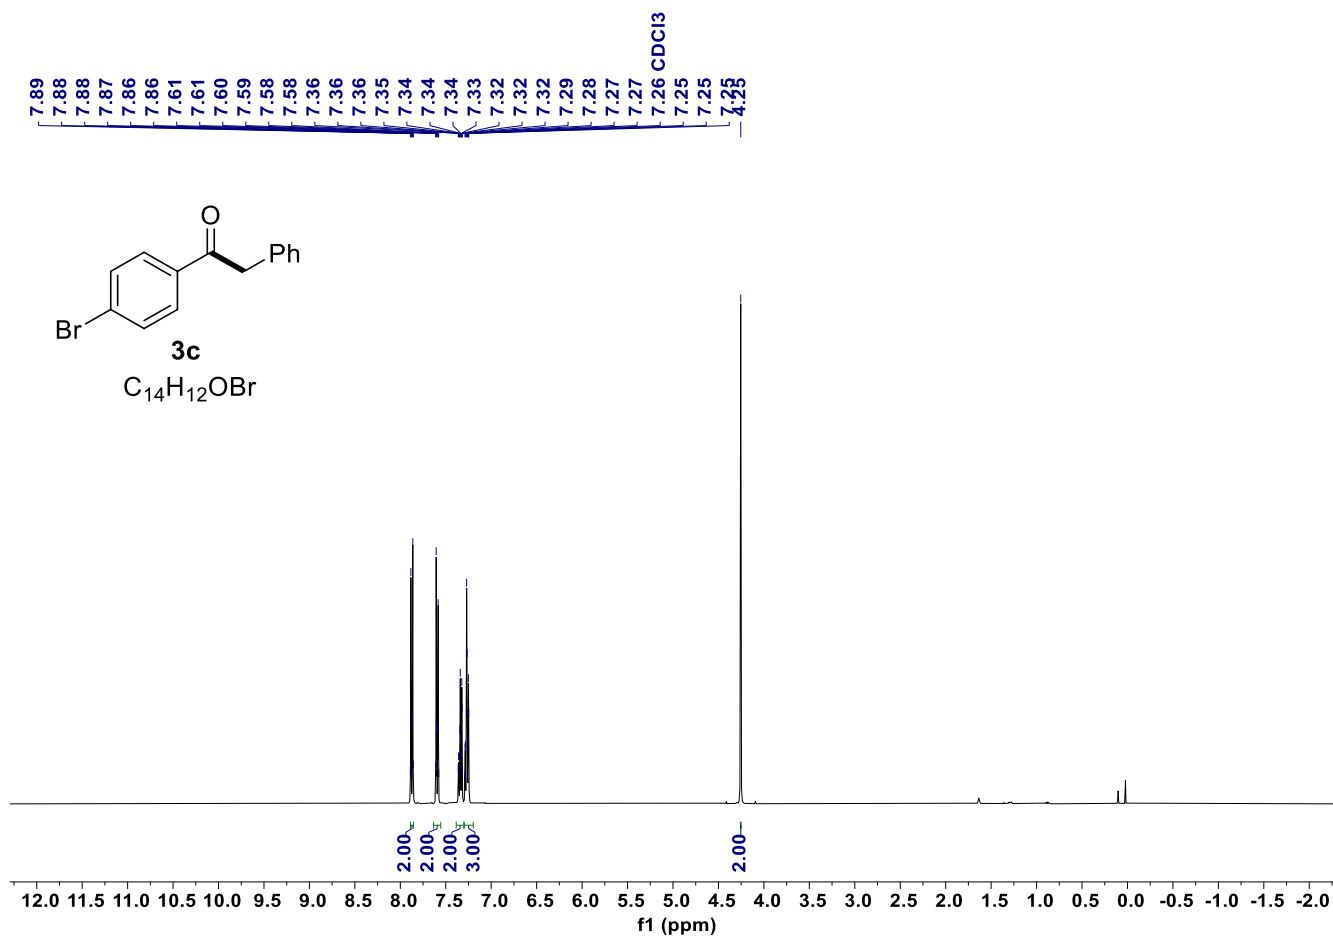

$^{13}\text{C}\{^1\text{H}\}$  NMR spectrum (100 MHz,  $\text{CDCl}_3$ ) of compound **3c**.

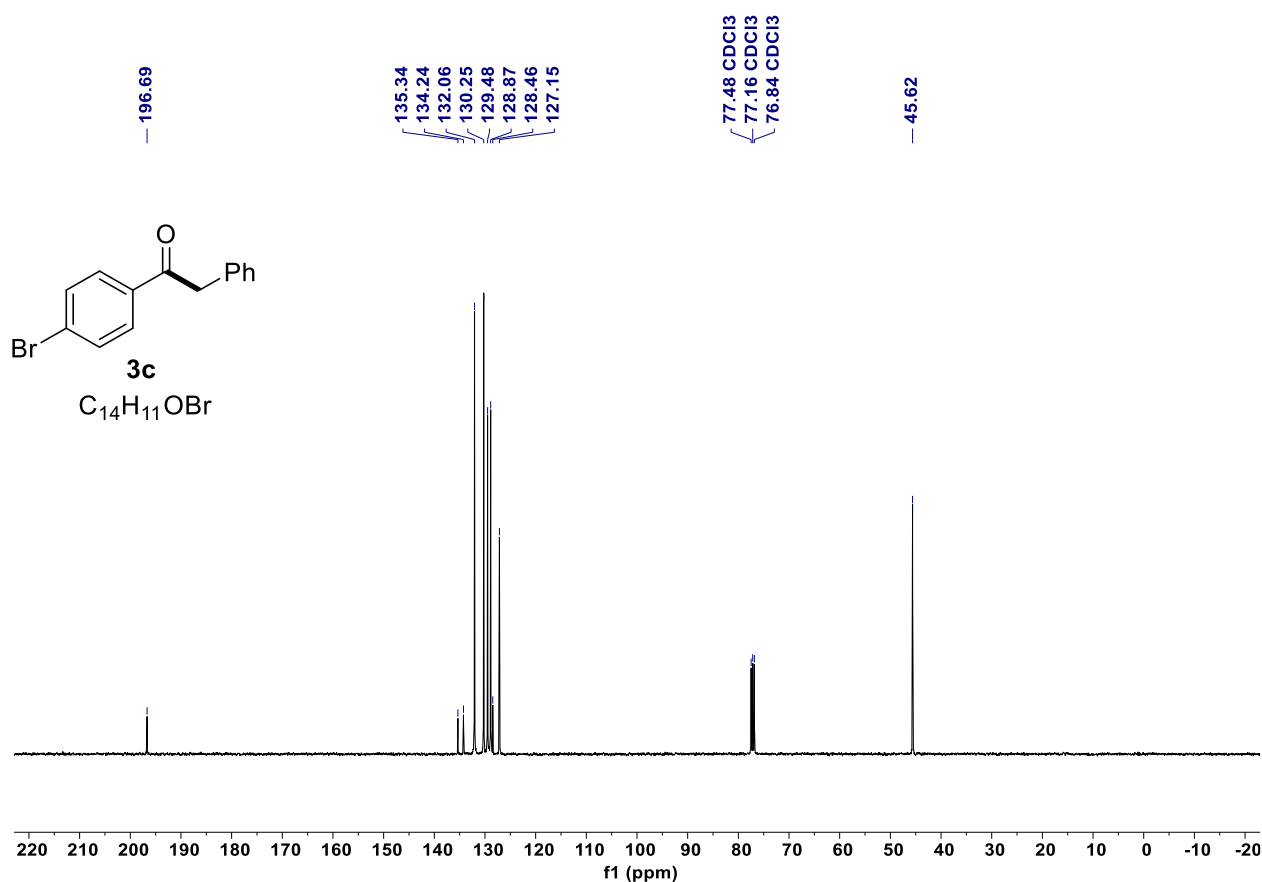

$^1\text{H}$  NMR spectrum (400 MHz,  $\text{CDCl}_3$ ) of compound **3d**.

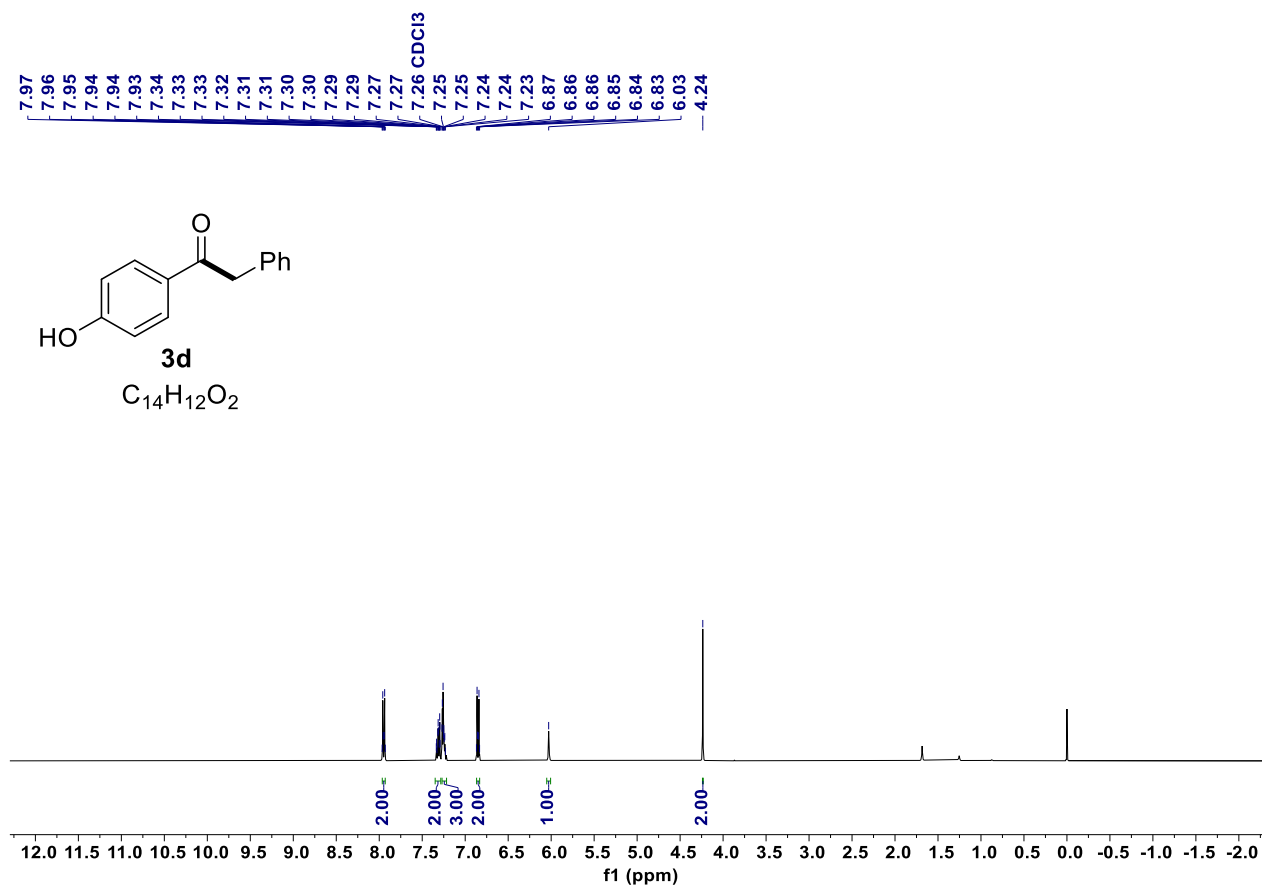

$^{13}\text{C}\{^1\text{H}\}$  NMR spectrum (100 MHz,  $\text{CDCl}_3$ ) of compound **3d**.

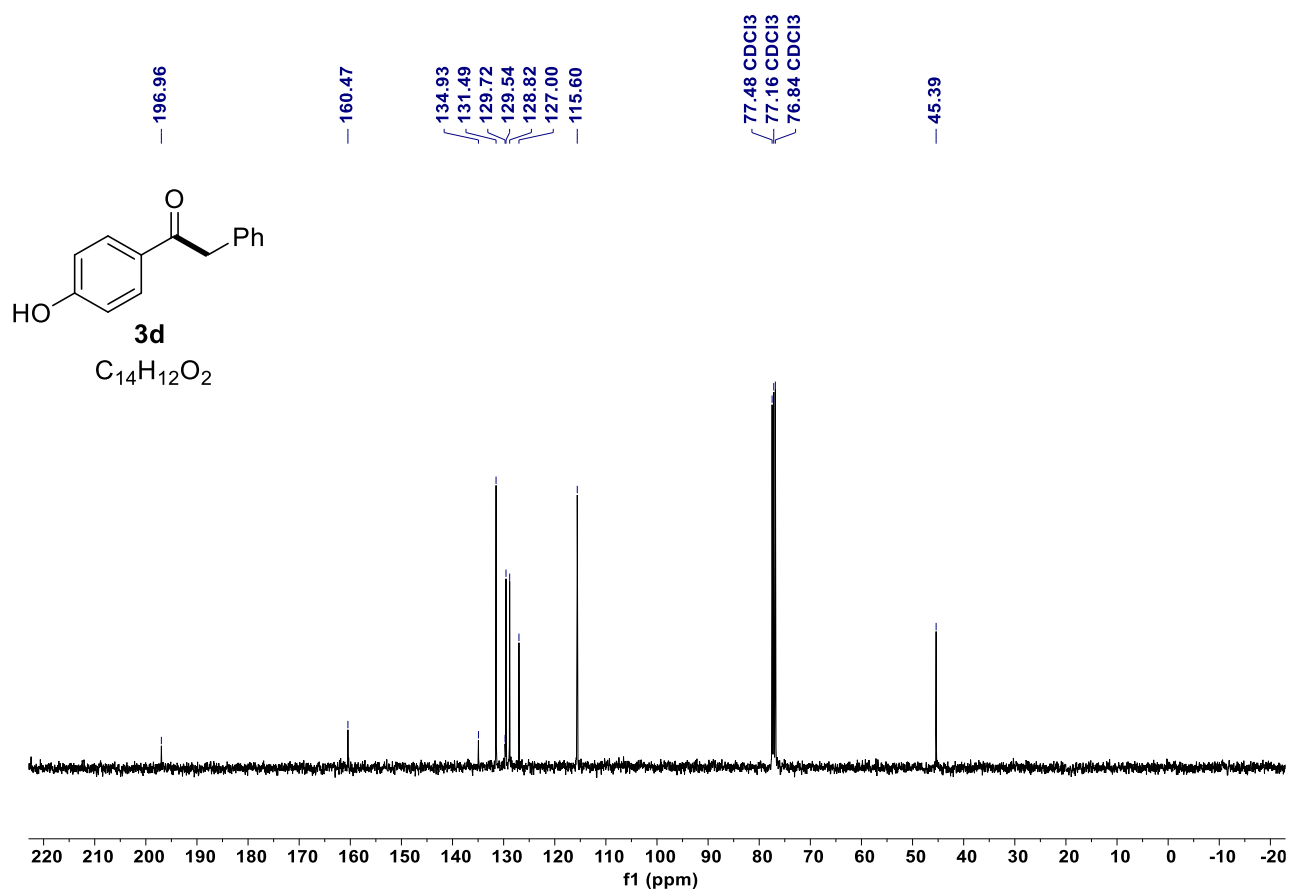

$^1\text{H}$  NMR spectrum (400 MHz,  $\text{CDCl}_3$ ) of compound **3e**.

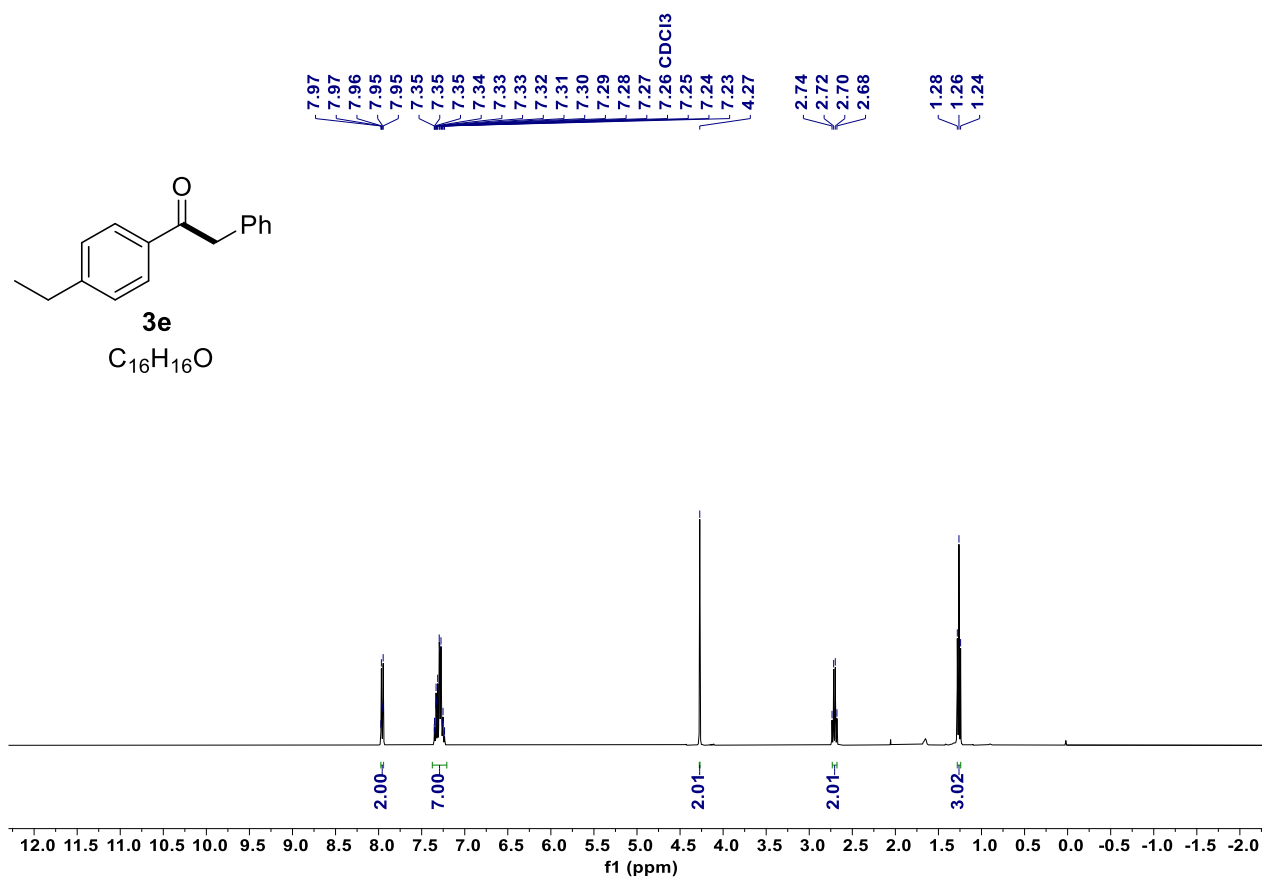

$^{13}\text{C}\{^1\text{H}\}$  NMR spectrum (100 MHz,  $\text{CDCl}_3$ ) of compound **3e**.

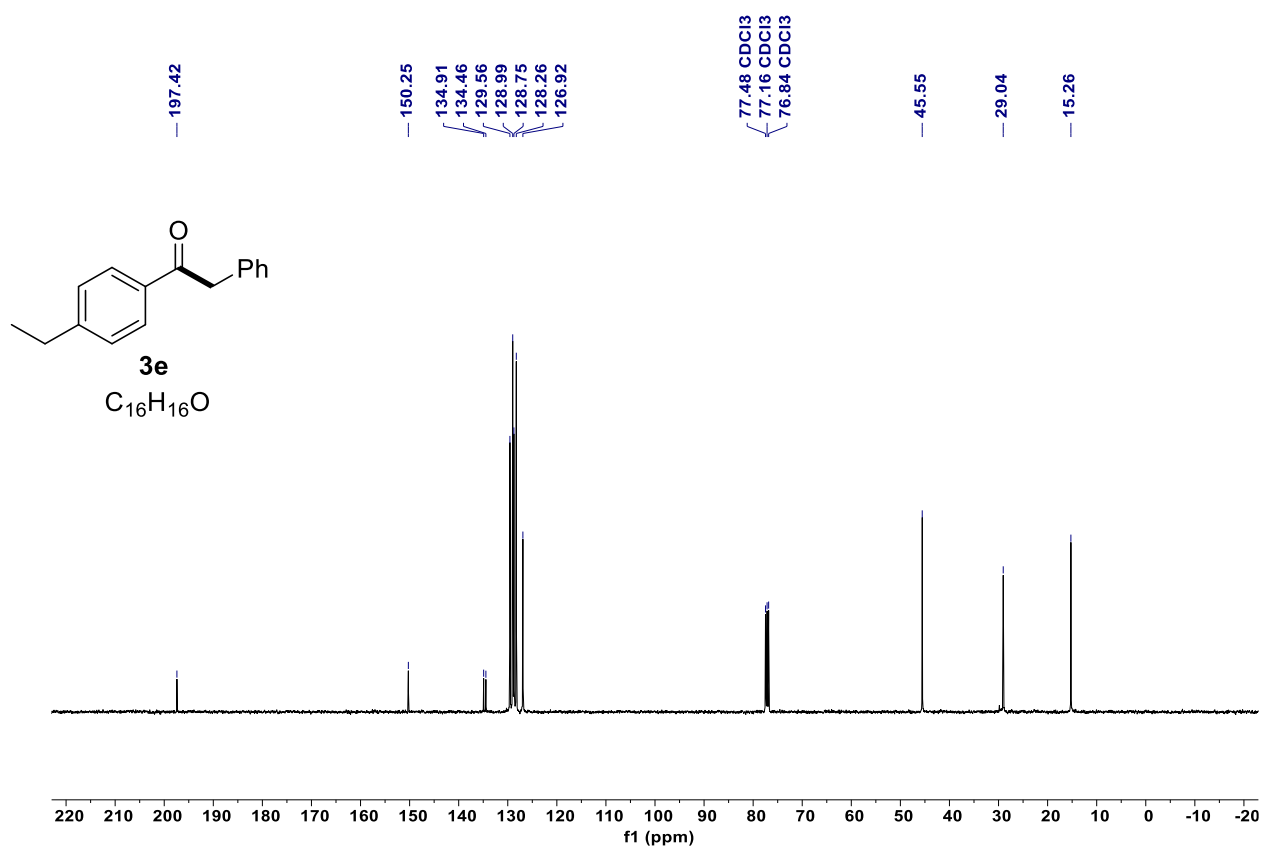

$^1\text{H}$  NMR spectrum (400 MHz,  $\text{CDCl}_3$ ) of compound **3f**.

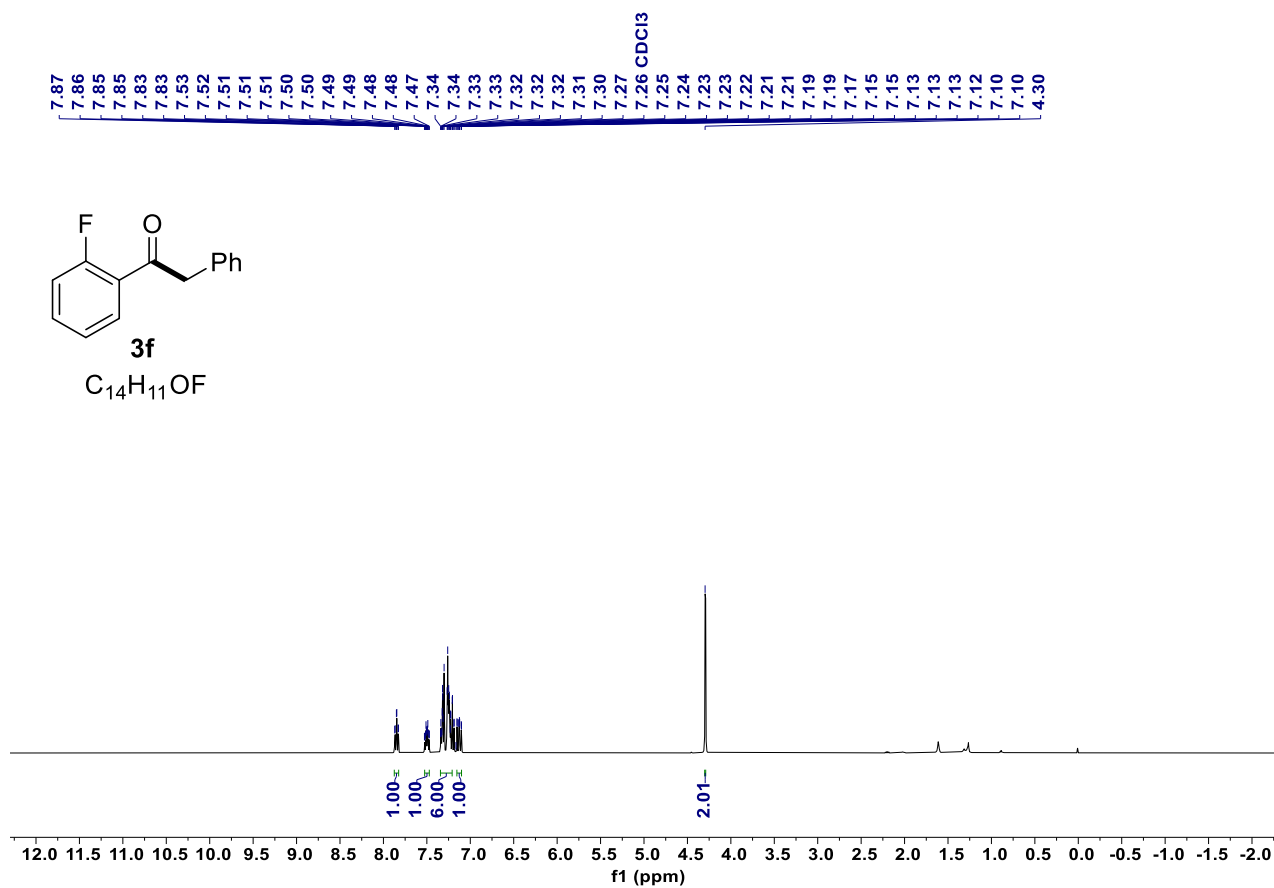

$^{13}\text{C}\{^1\text{H}\}$  NMR spectrum (100 MHz,  $\text{CDCl}_3$ ) of compound **3f**.

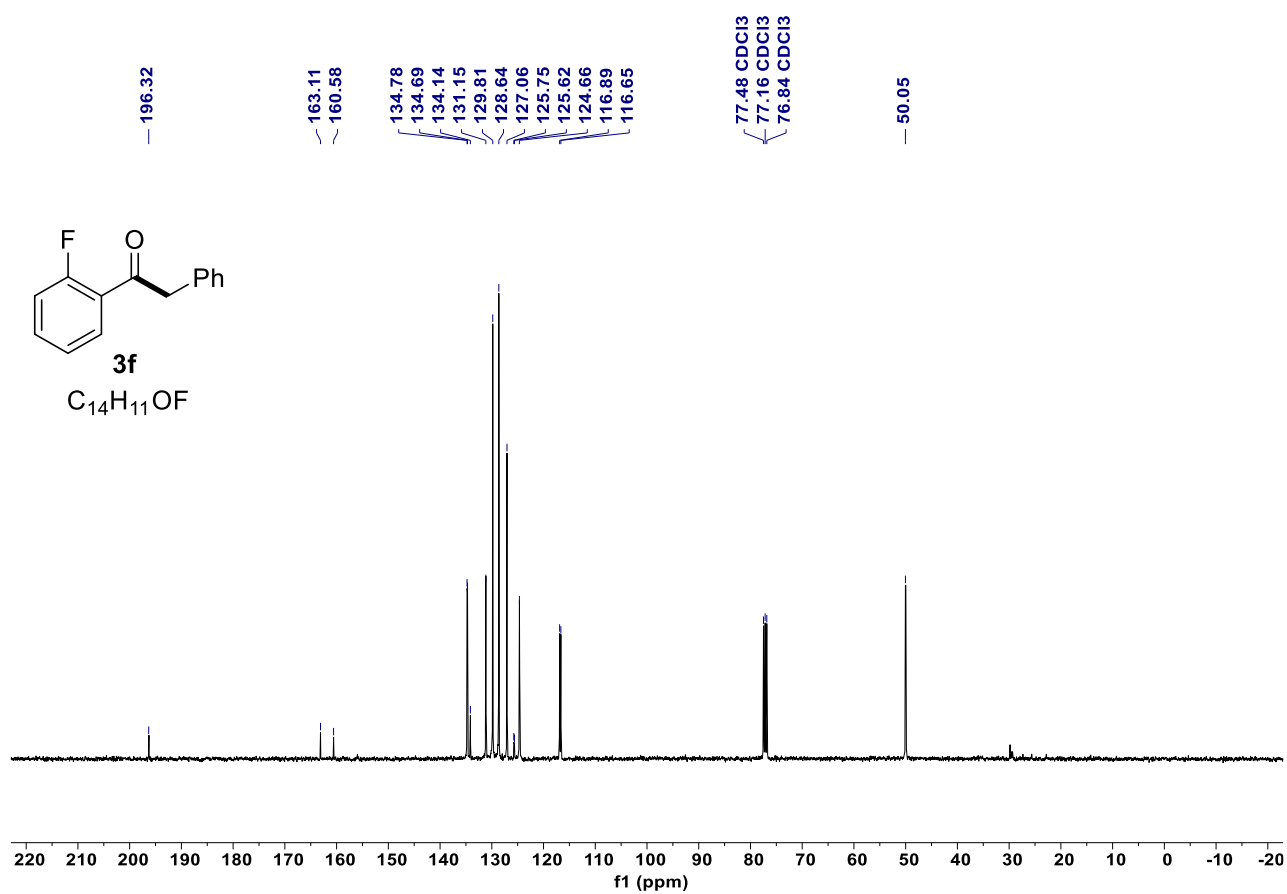

$^{19}\text{F}$  NMR spectrum ( $\text{CDCl}_3$ , 376 MHz) of the compound **3f**

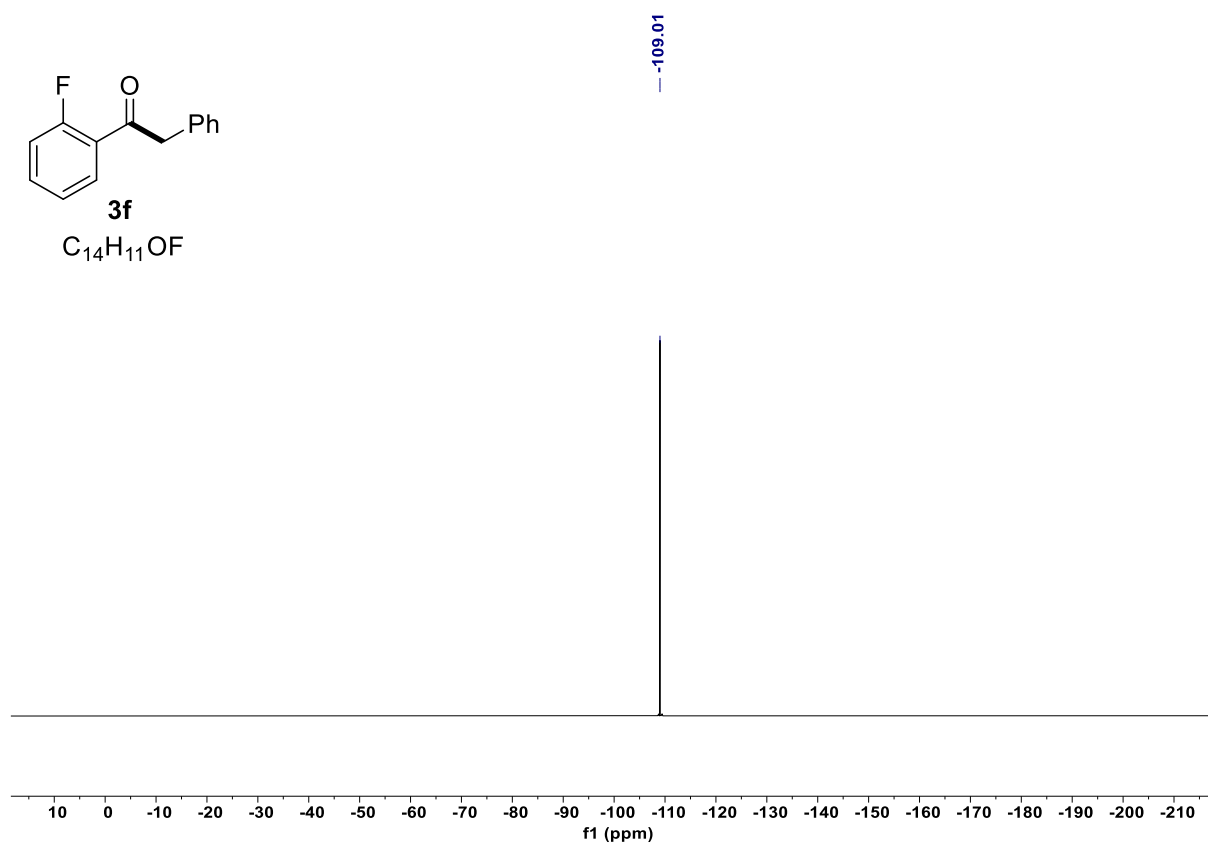

<sup>1</sup>H NMR spectrum (400 MHz, CDCl<sub>3</sub>) of compound **3g**.

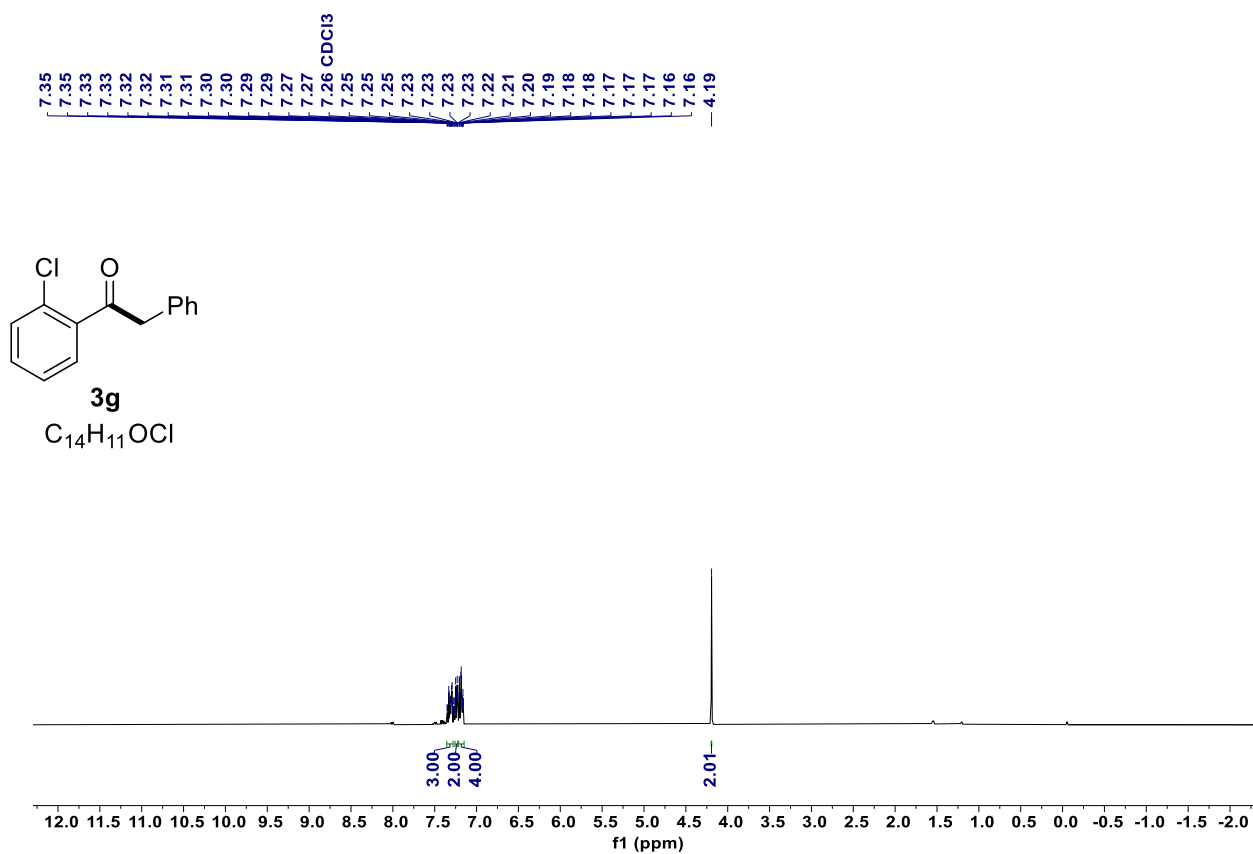

<sup>13</sup>C{<sup>1</sup>H} NMR spectrum (100 MHz, CDCl<sub>3</sub>) of compound **3g**.

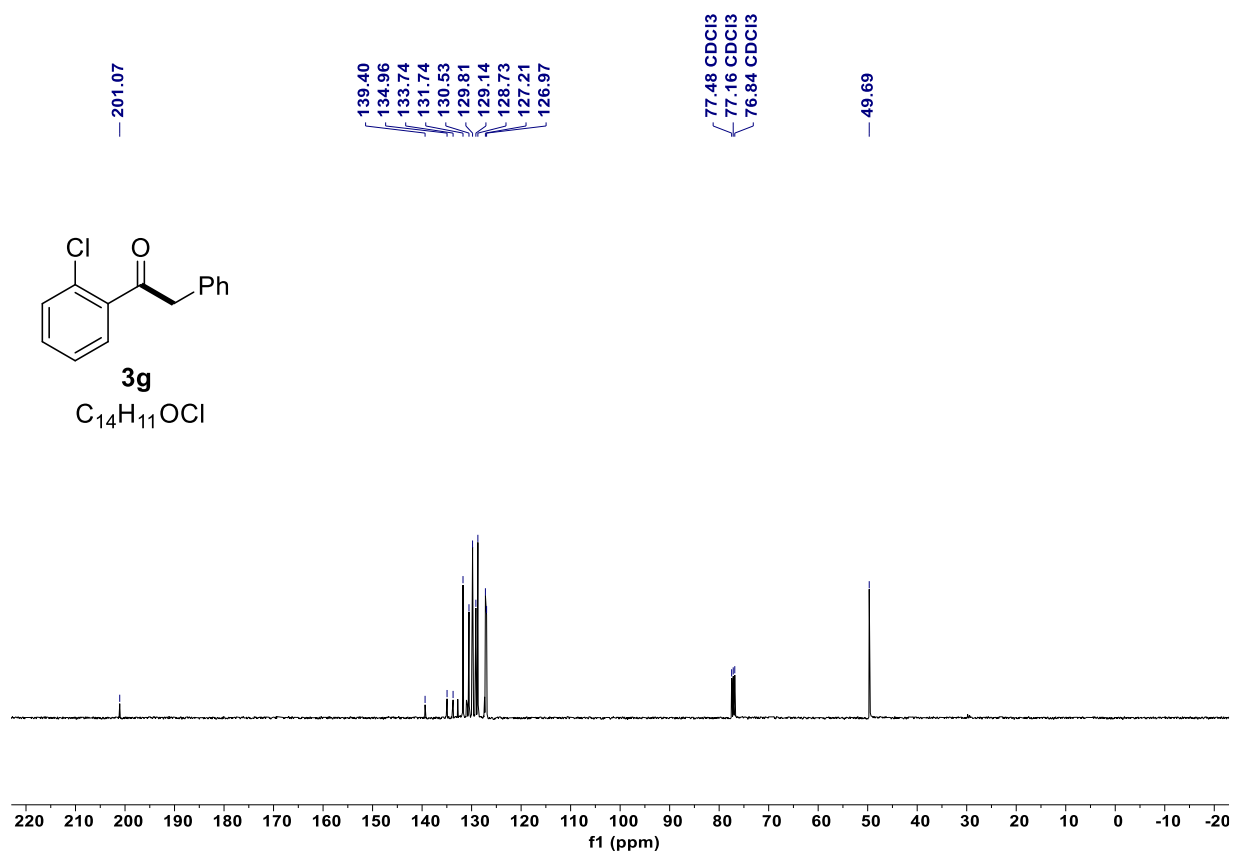

<sup>1</sup>H NMR spectrum (400 MHz, CDCl<sub>3</sub>) of compound **3h**.

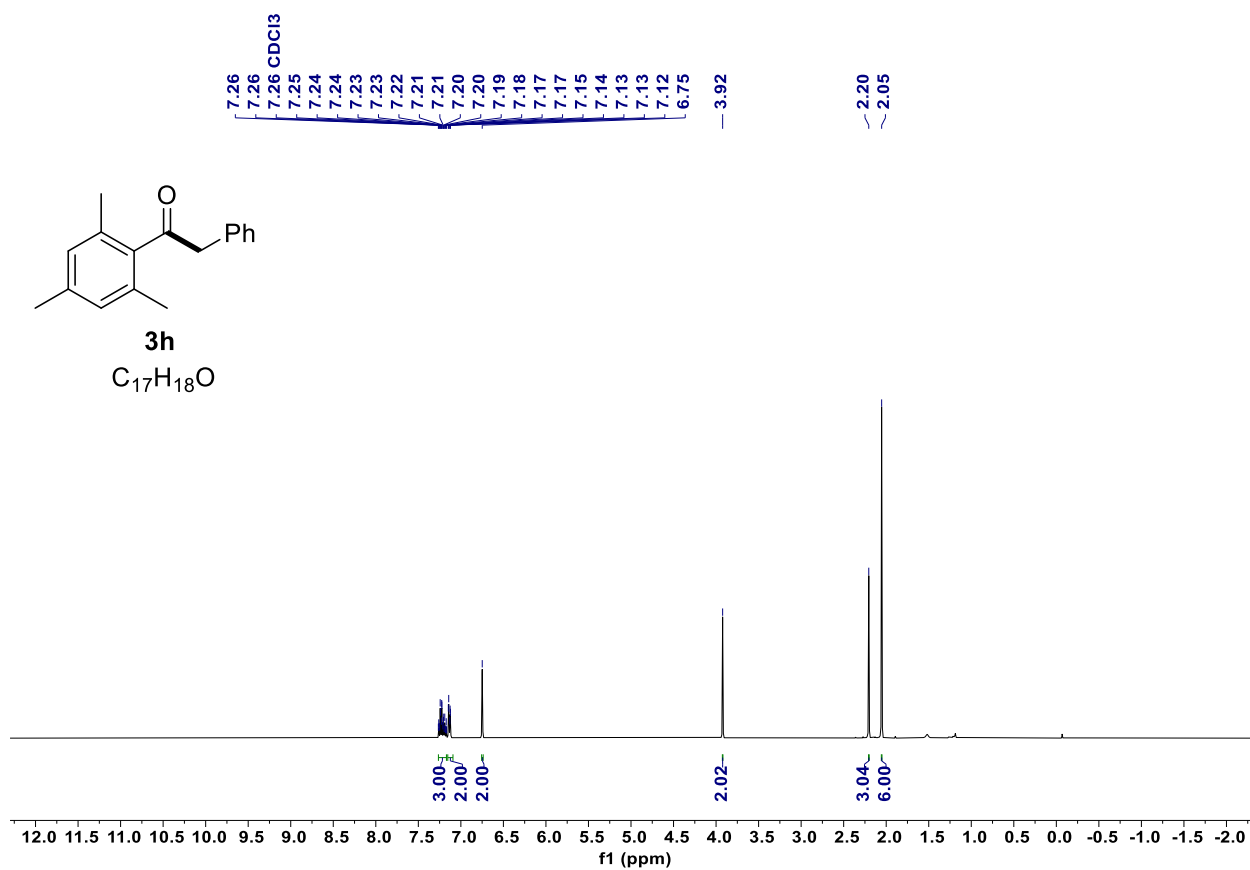

<sup>13</sup>C{<sup>1</sup>H} NMR spectrum (100 MHz, CDCl<sub>3</sub>) of compound **3h**.

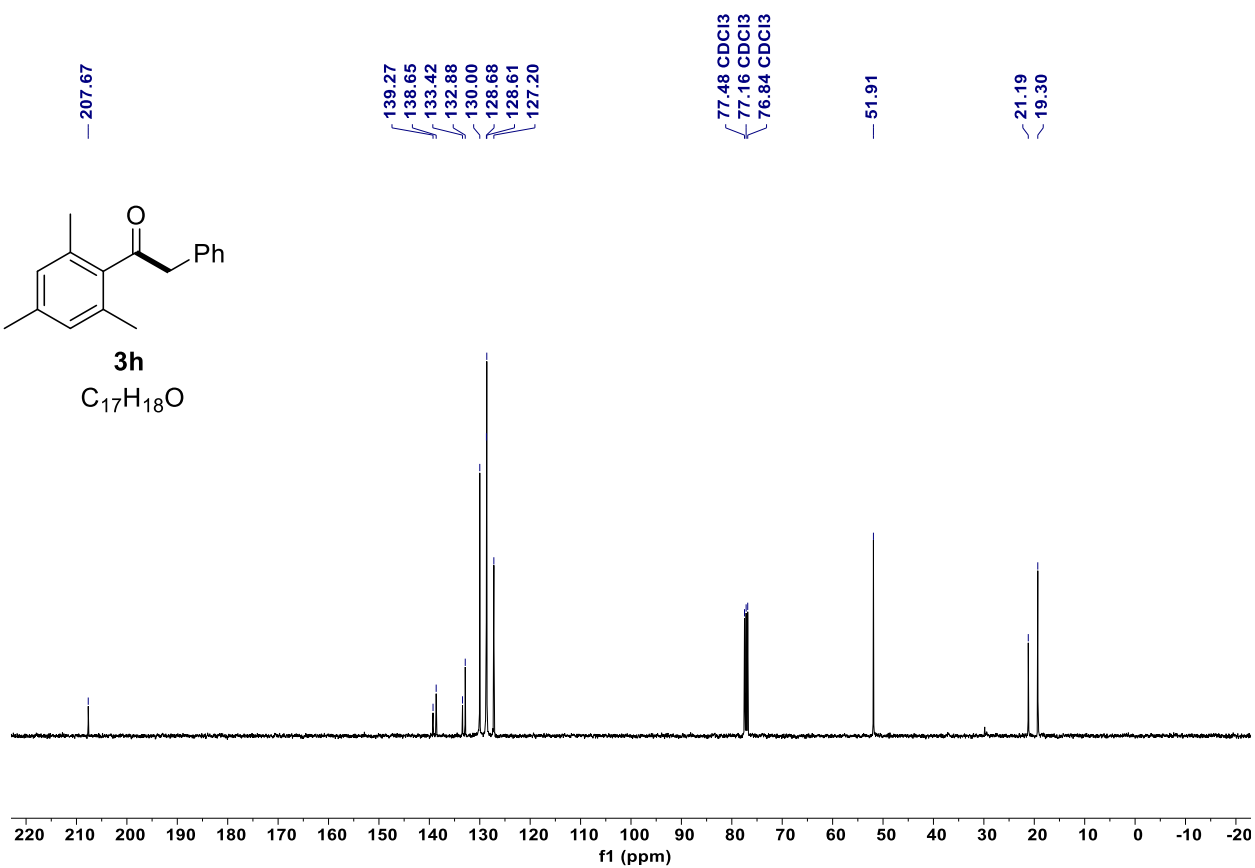

$^1\text{H}$  NMR spectrum (400 MHz,  $\text{CDCl}_3$ ) of compound **4a**.

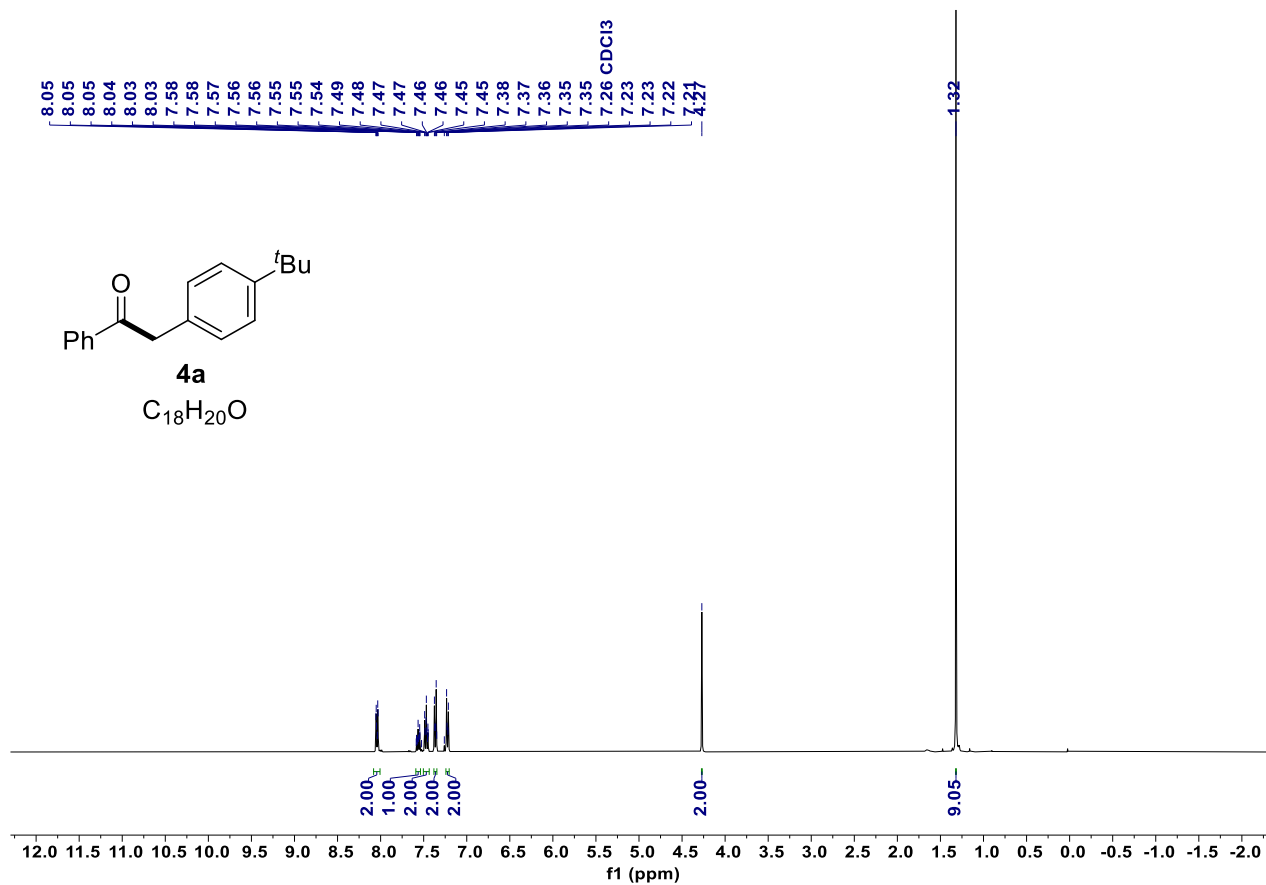

$^{13}\text{C}\{^1\text{H}\}$  NMR spectrum (100 MHz,  $\text{CDCl}_3$ ) of compound **4a**.

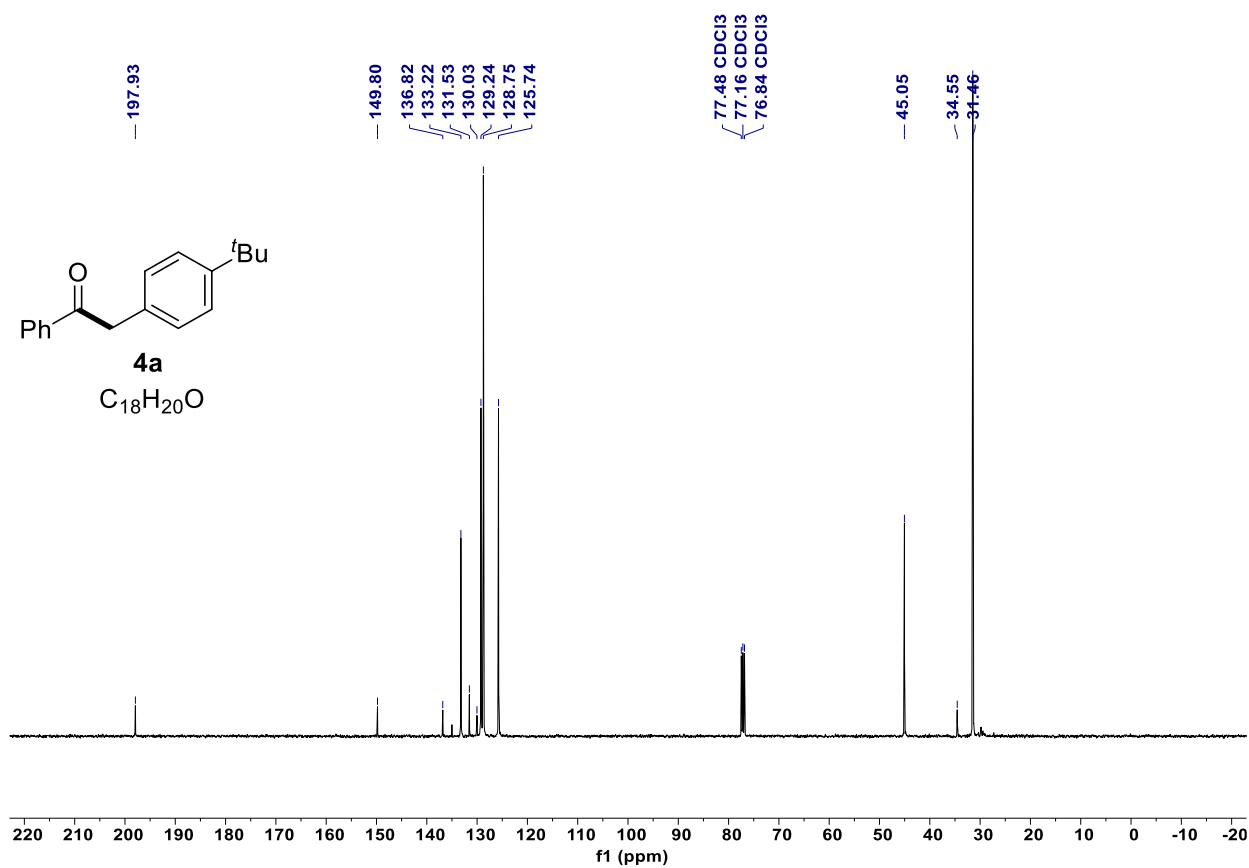



<sup>1</sup>H NMR spectrum (400 MHz, CDCl<sub>3</sub>) of compound **4b**.

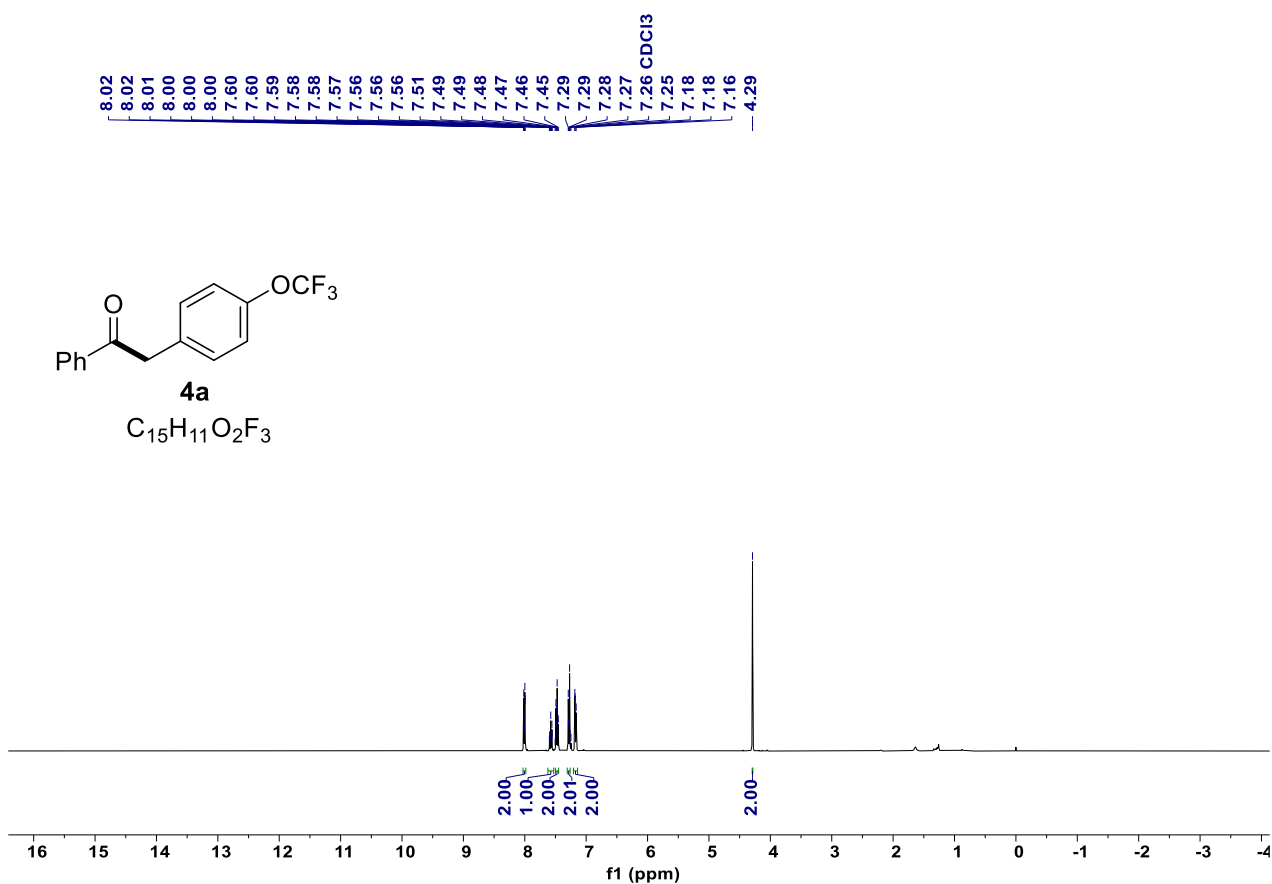

<sup>13</sup>C{<sup>1</sup>H} NMR spectrum (100 MHz, CDCl<sub>3</sub>) of compound **4b**.

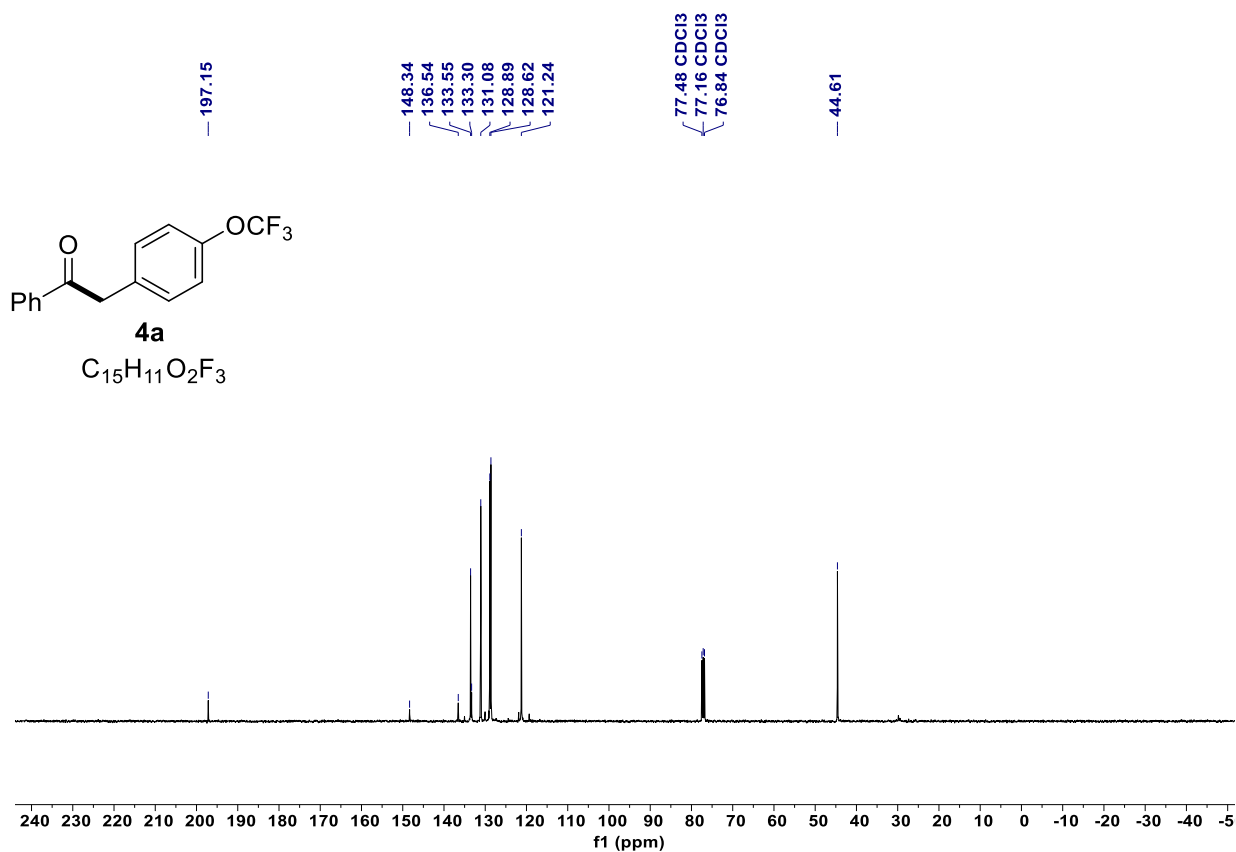

<sup>19</sup>F NMR spectrum (CDCl<sub>3</sub>, 376 MHz) of the compound **4b**

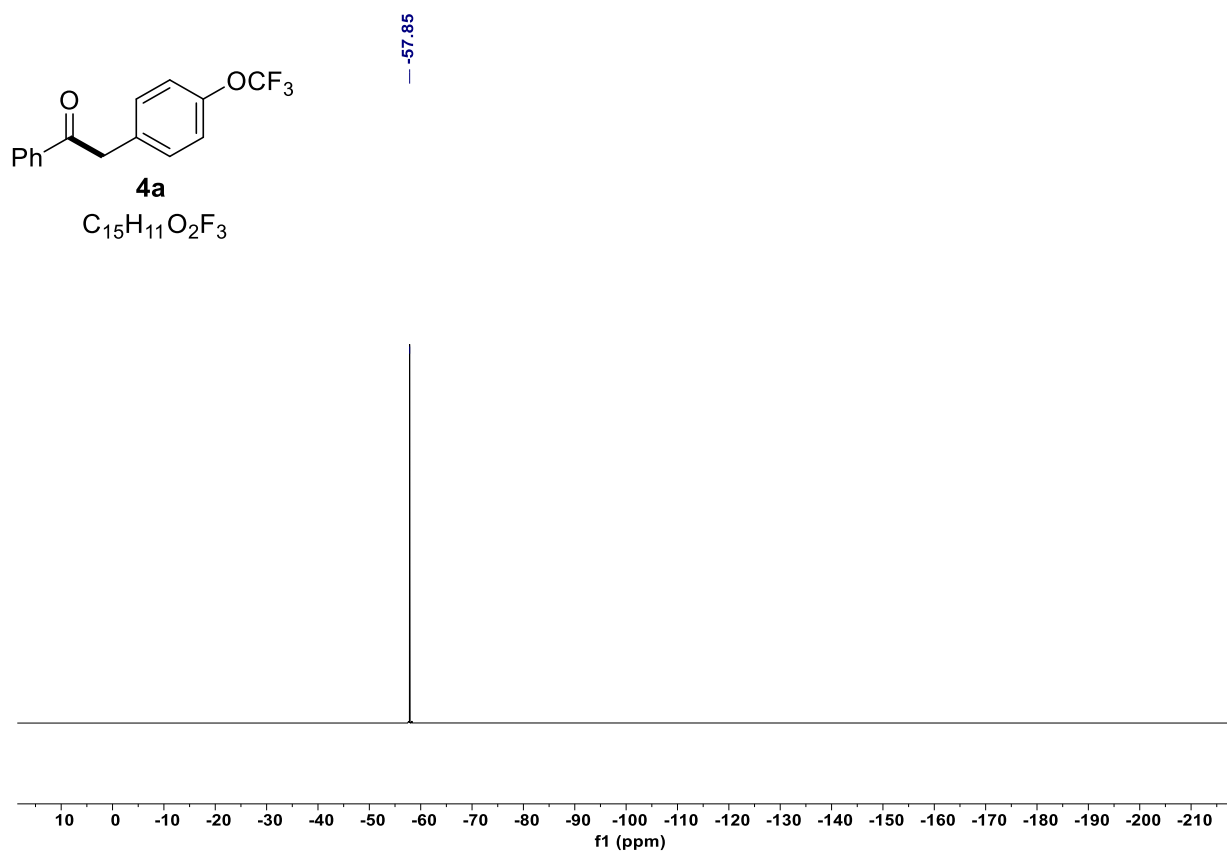

<sup>1</sup>H NMR spectrum (400 MHz, CDCl<sub>3</sub>) of compound **4c**.

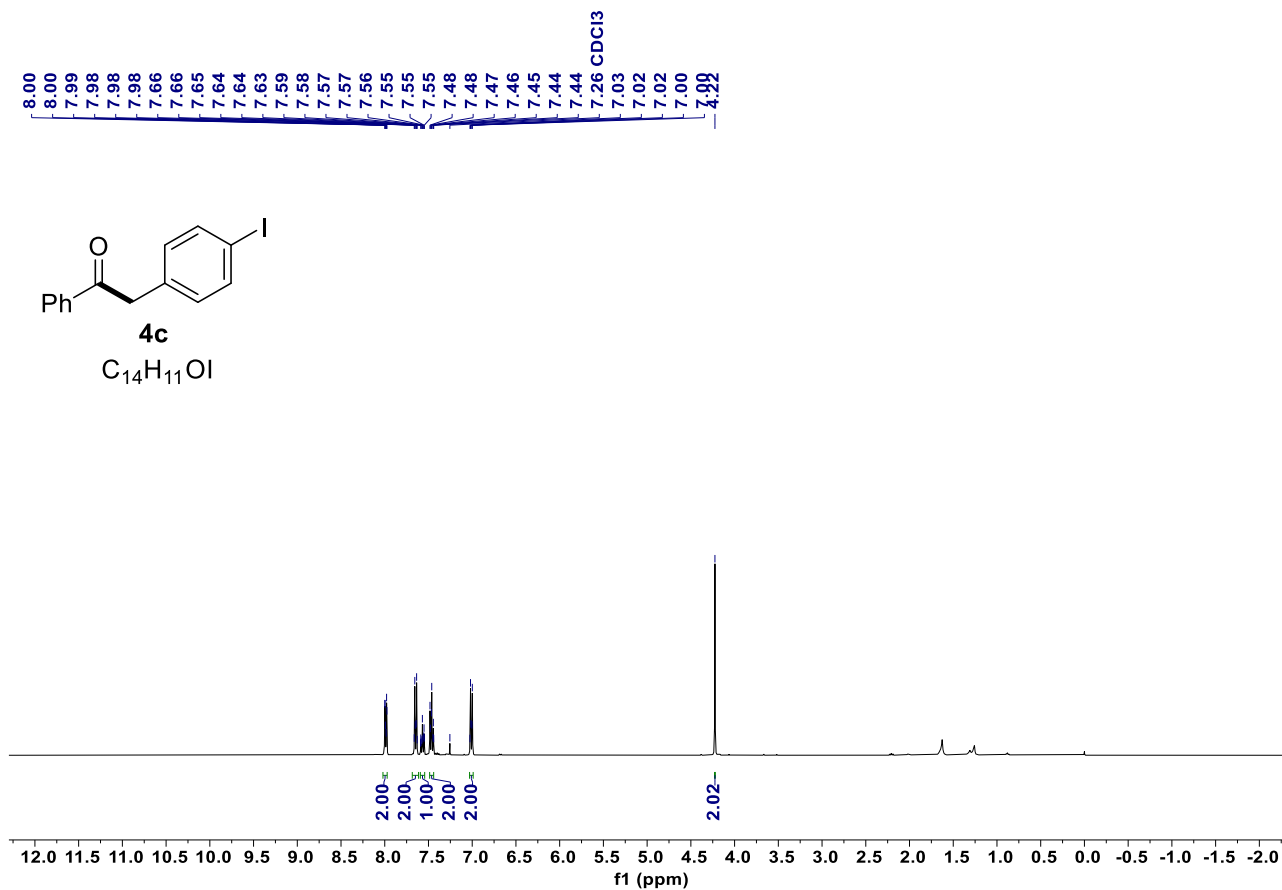

$^{13}\text{C}\{^1\text{H}\}$  NMR spectrum (100 MHz,  $\text{CDCl}_3$ ) of compound **4c**.

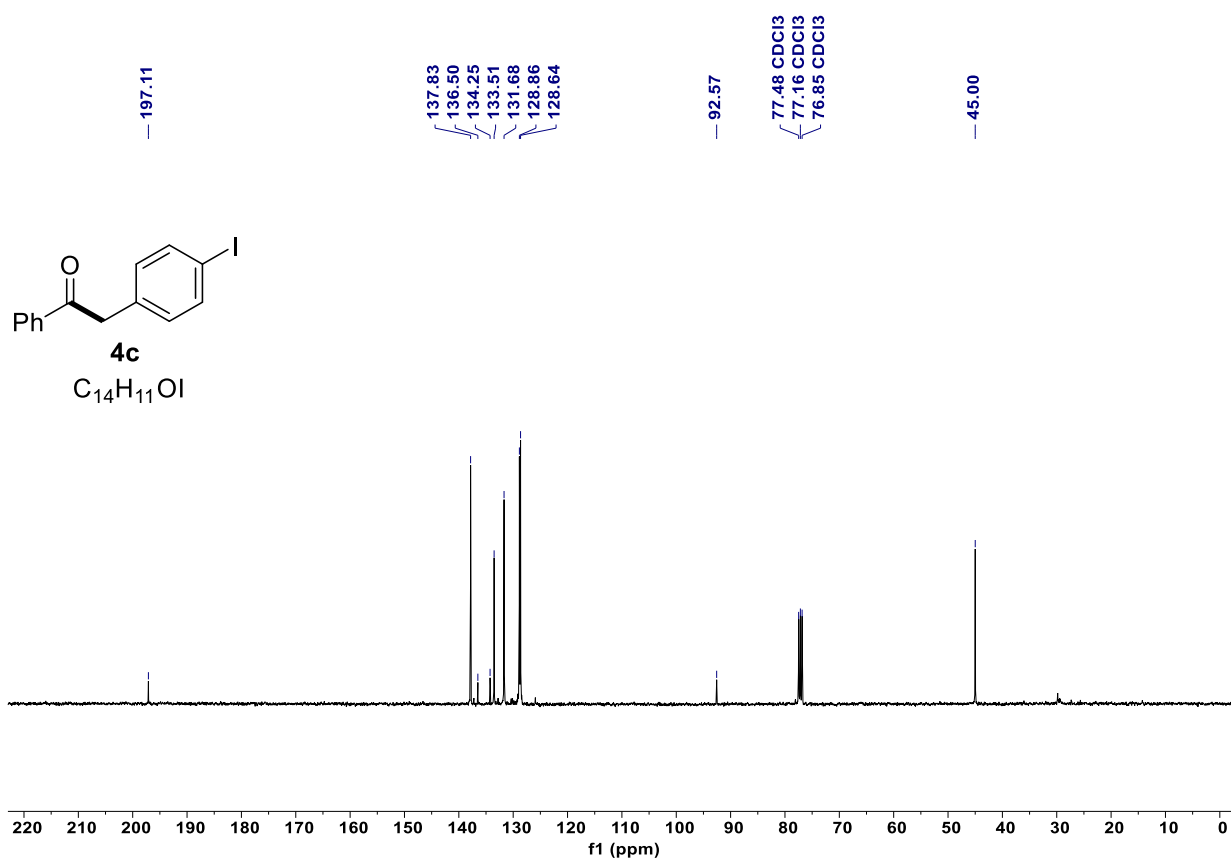

$^1\text{H}$  NMR spectrum (400 MHz,  $\text{CDCl}_3$ ) of compound **4d**.

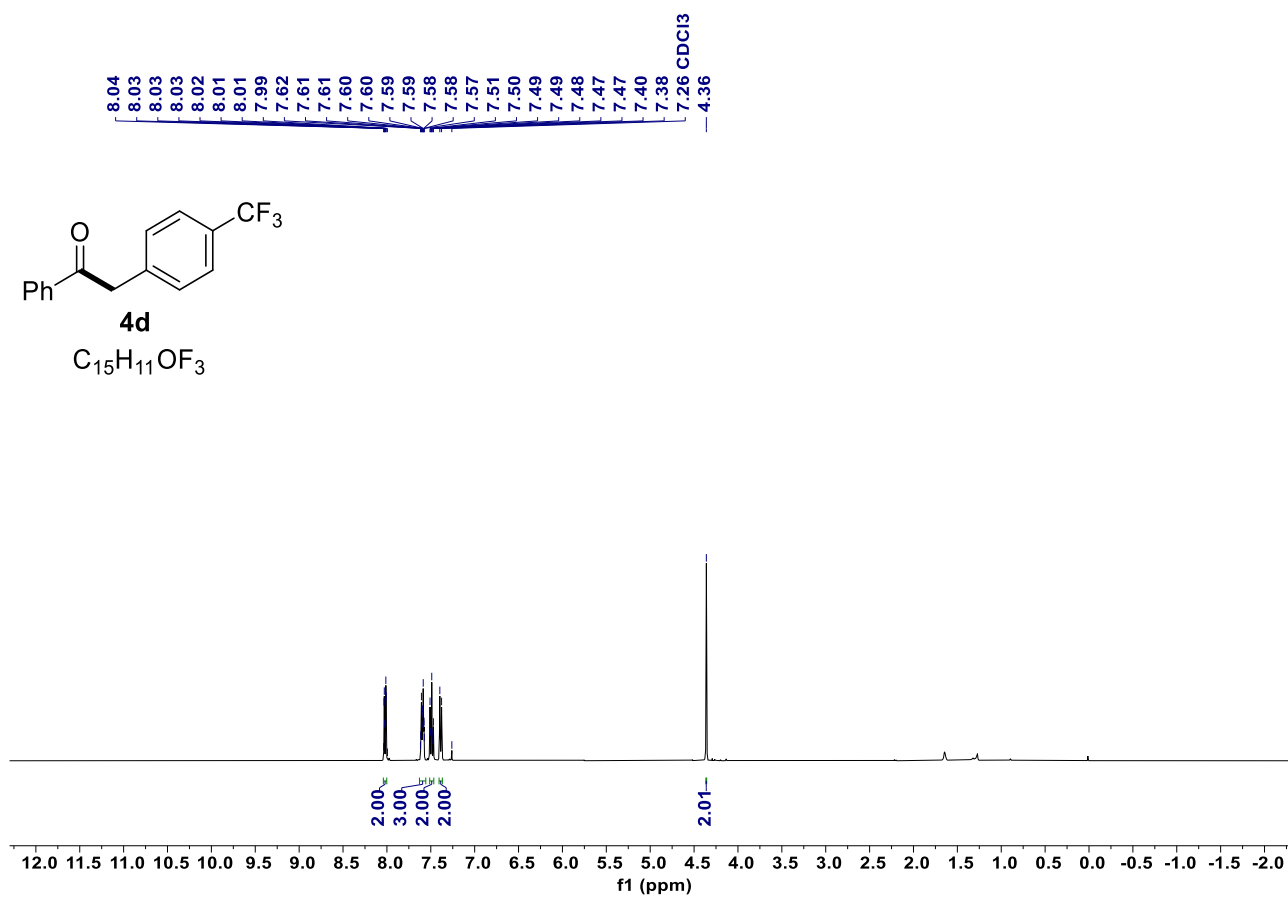

$^{13}\text{C}\{^1\text{H}\}$  NMR spectrum (100 MHz,  $\text{CDCl}_3$ ) of compound **4d**.

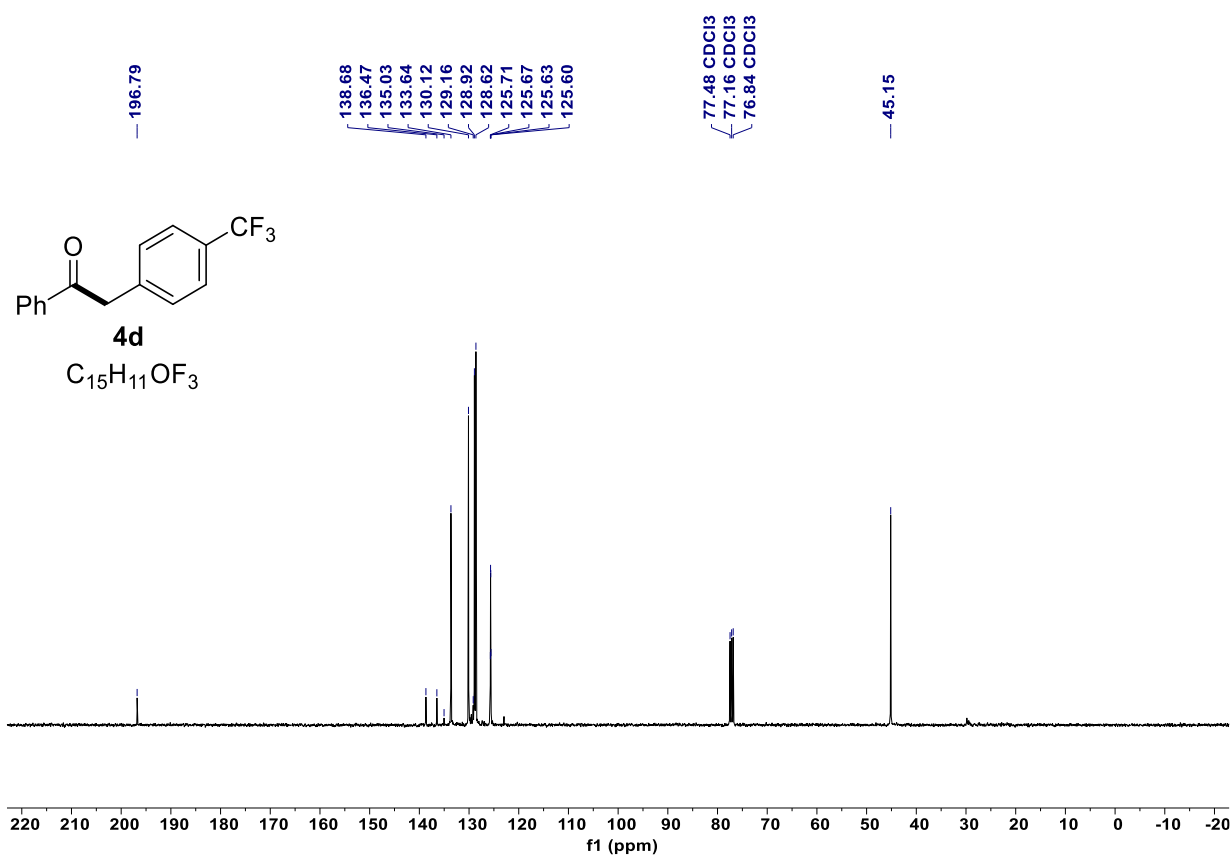

$^{19}\text{F}$  NMR spectrum ( $\text{CDCl}_3$ , 376 MHz) of the compound **4d**.

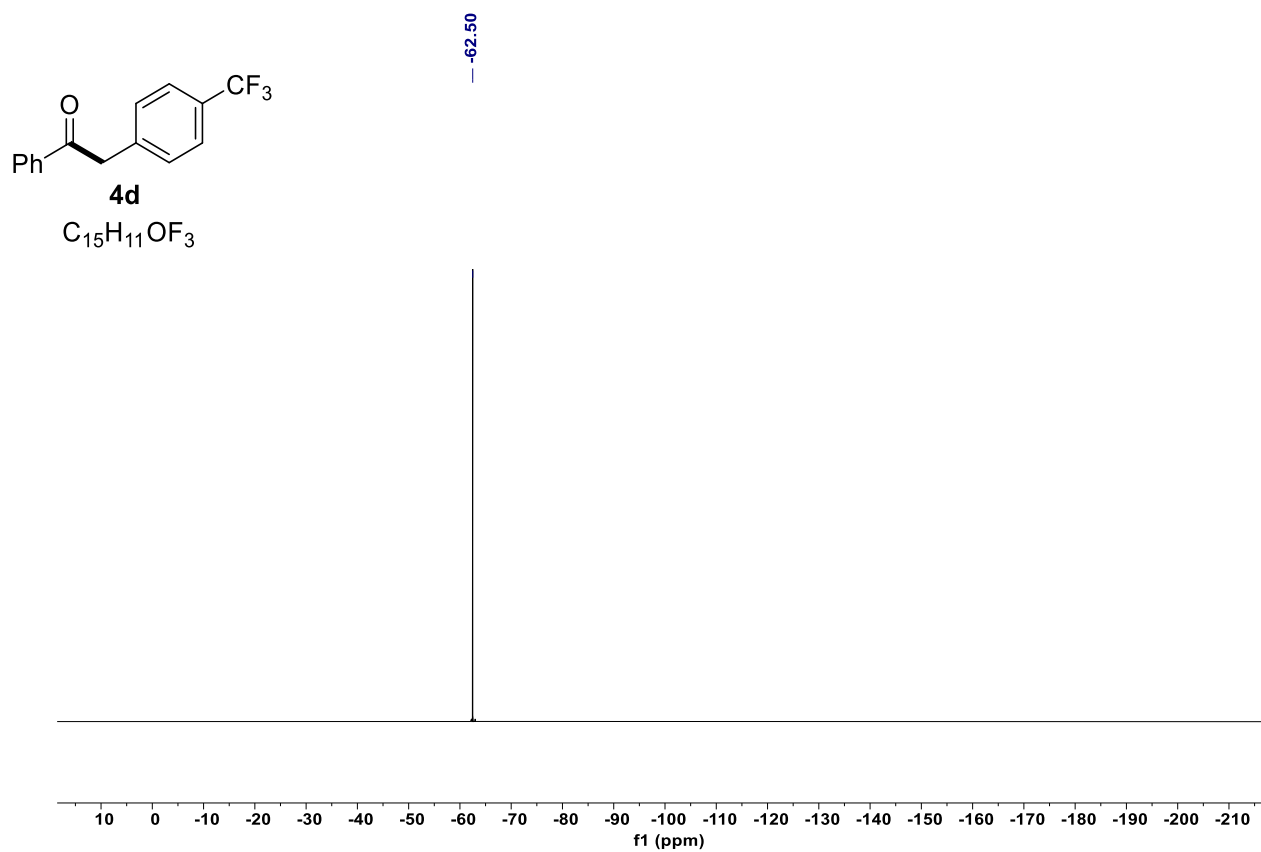

<sup>1</sup>H NMR spectrum (400 MHz, CDCl<sub>3</sub>) of compound **4e**.

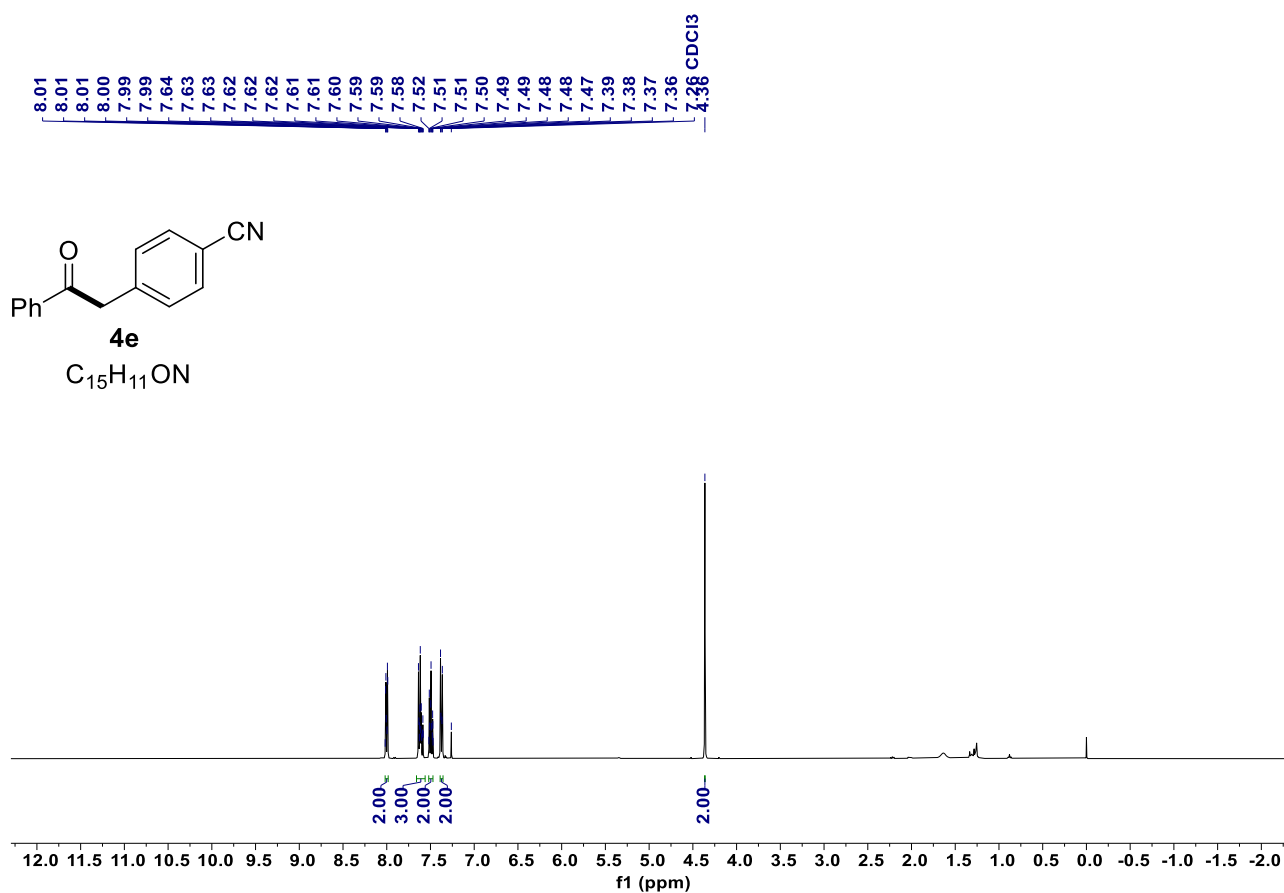

<sup>13</sup>C{<sup>1</sup>H} NMR spectrum (100 MHz, CDCl<sub>3</sub>) of compound **4e**.

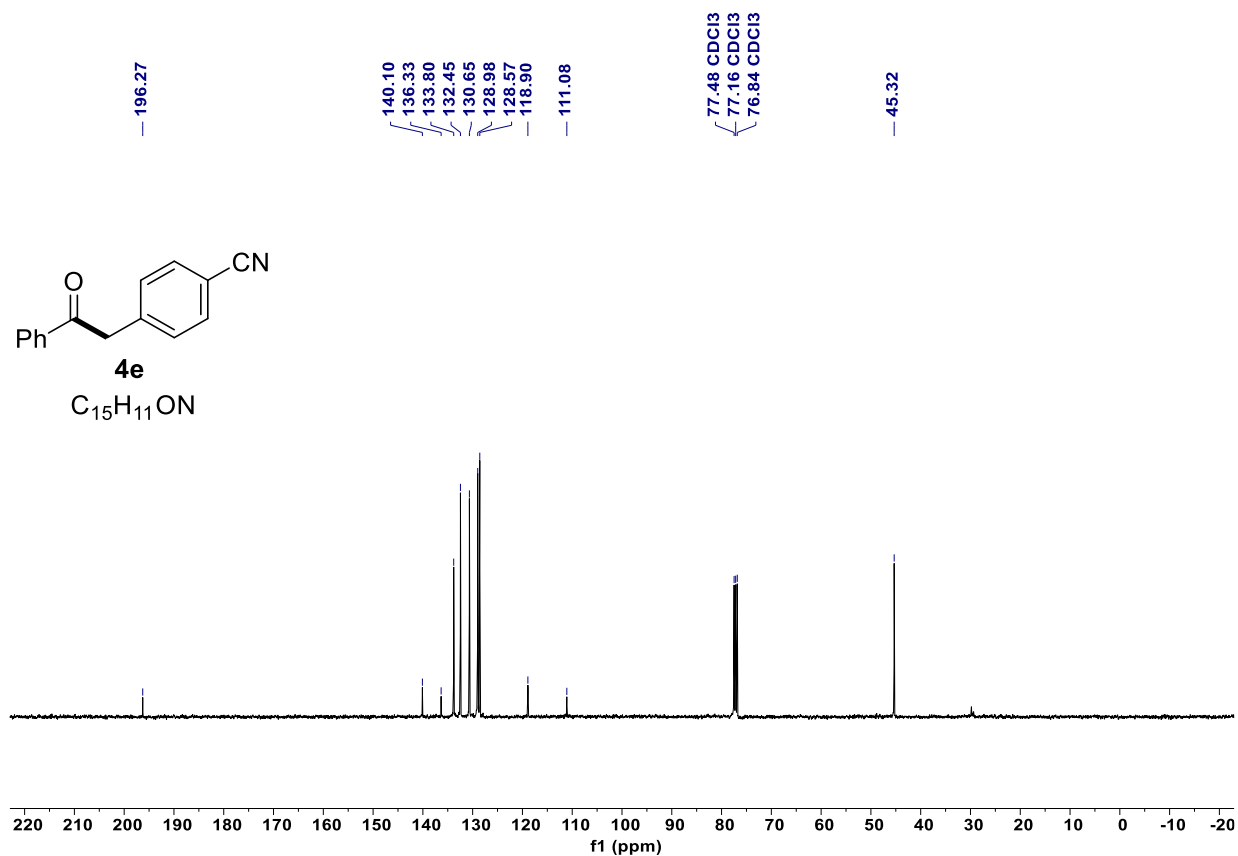

$^1\text{H}$  NMR spectrum (400 MHz,  $\text{CDCl}_3$ ) of compound **4f**.

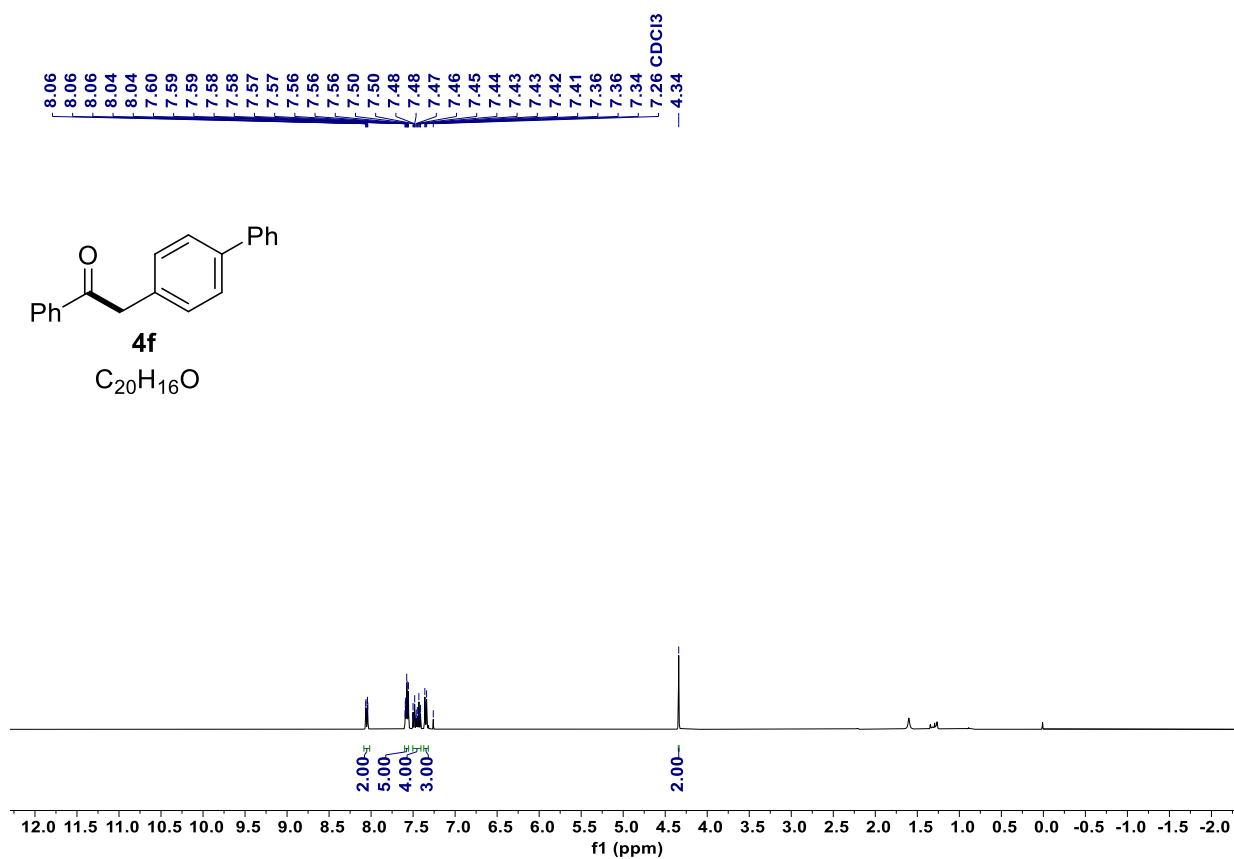

$^{13}\text{C}\{^1\text{H}\}$  NMR spectrum (100 MHz,  $\text{CDCl}_3$ ) of compound **4f**.

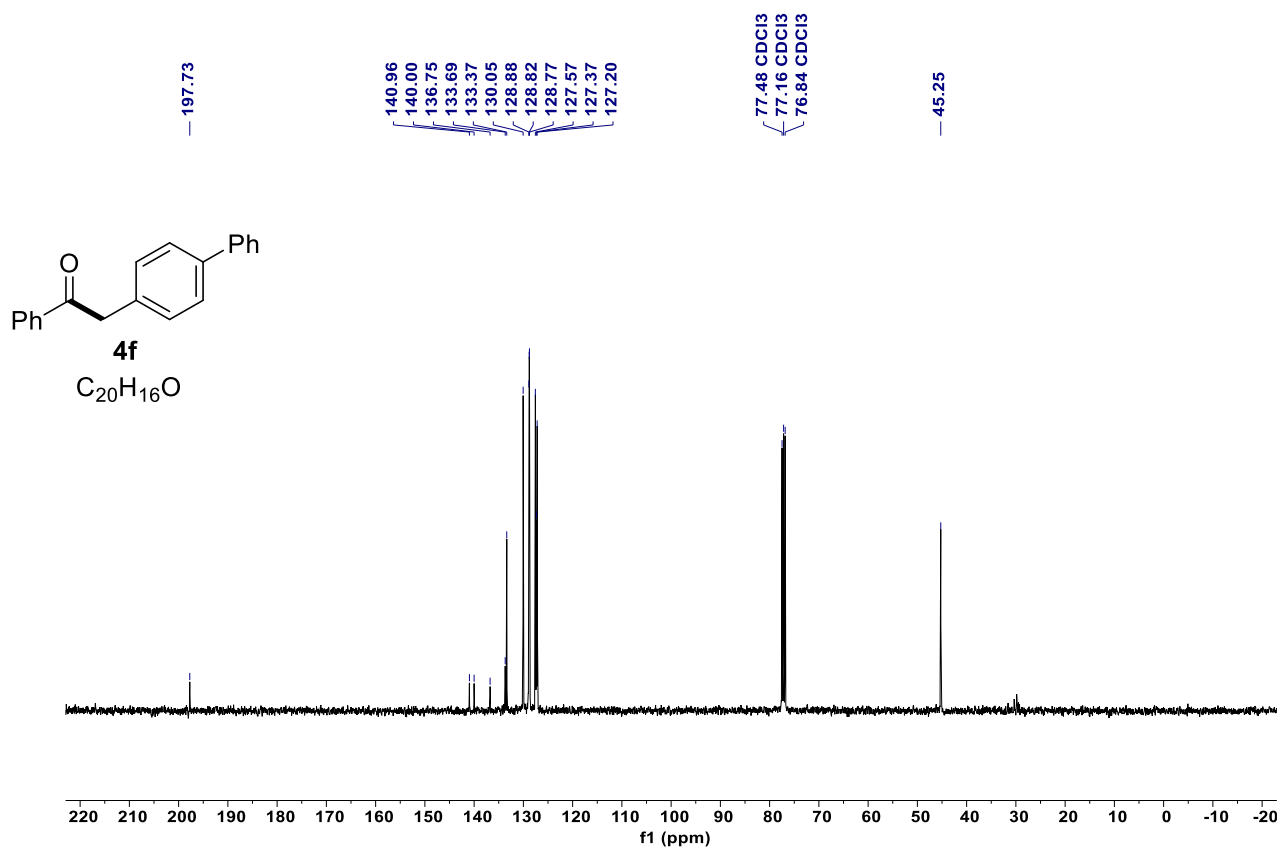

$^1\text{H}$  NMR spectrum (400 MHz,  $\text{CDCl}_3$ ) of compound **4g**.

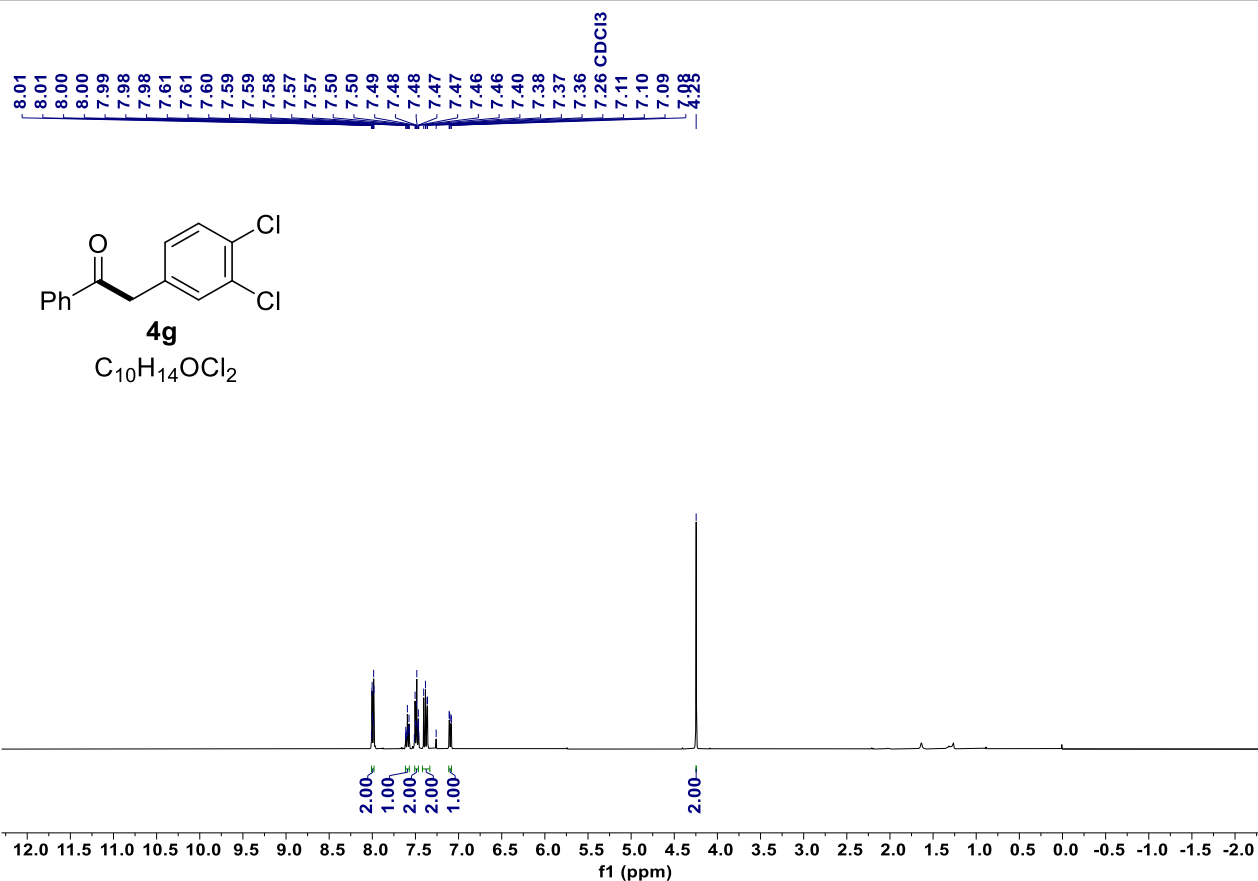

$^{13}C\{^1H\}$  NMR spectrum (100 MHz,  $CDCl_3$ ) of compound **4g**.

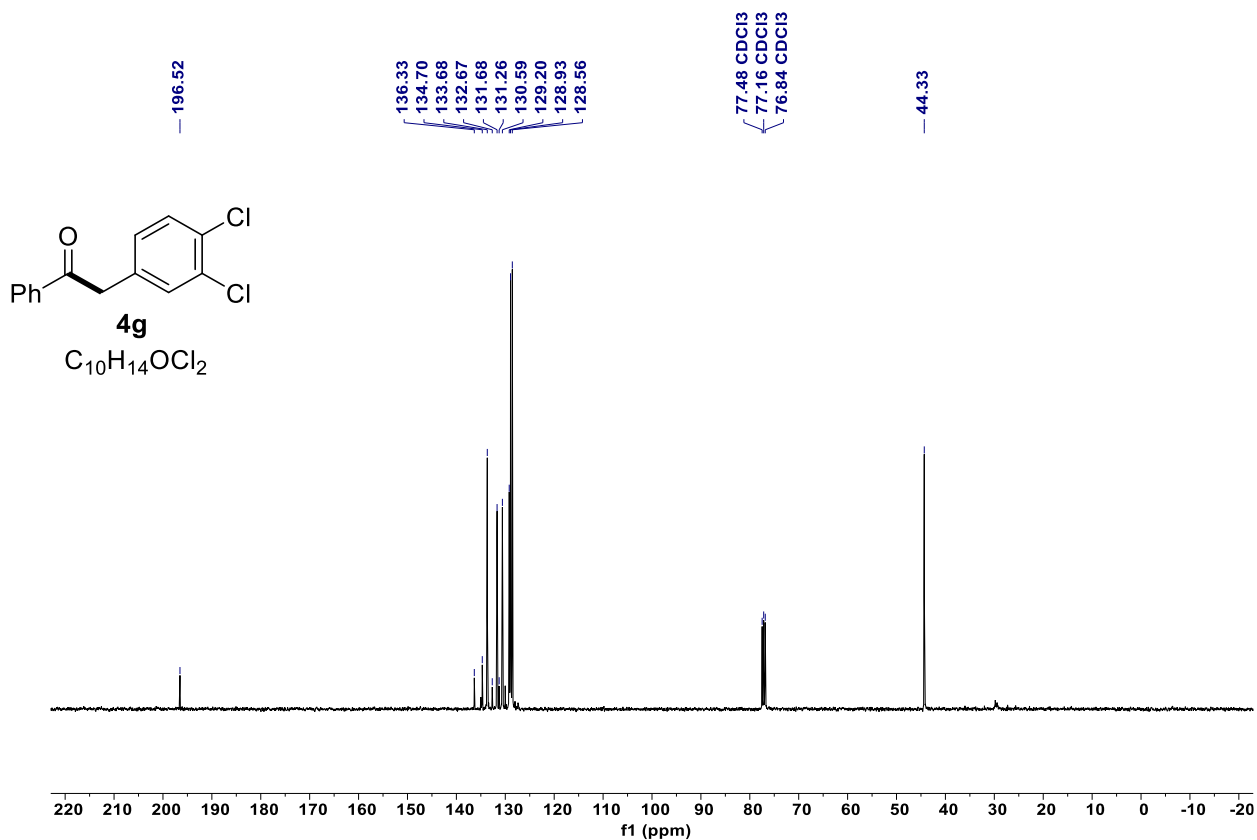

$^1H$  NMR spectrum (400 MHz,  $CDCl_3$ ) of compound **4h**

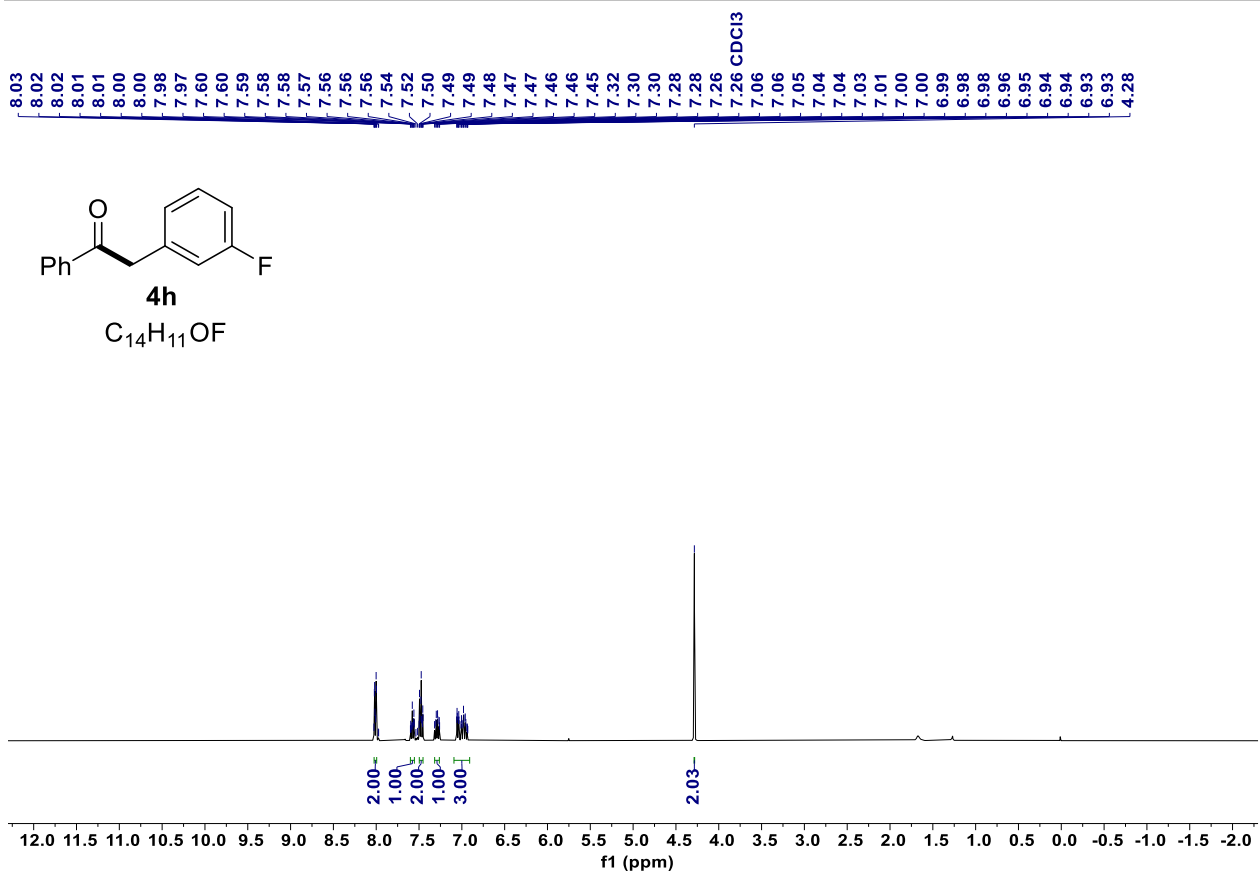

$^{13}C\{^1H\}$  NMR spectrum (100 MHz,  $CDCl_3$ ) of compound **4h**.

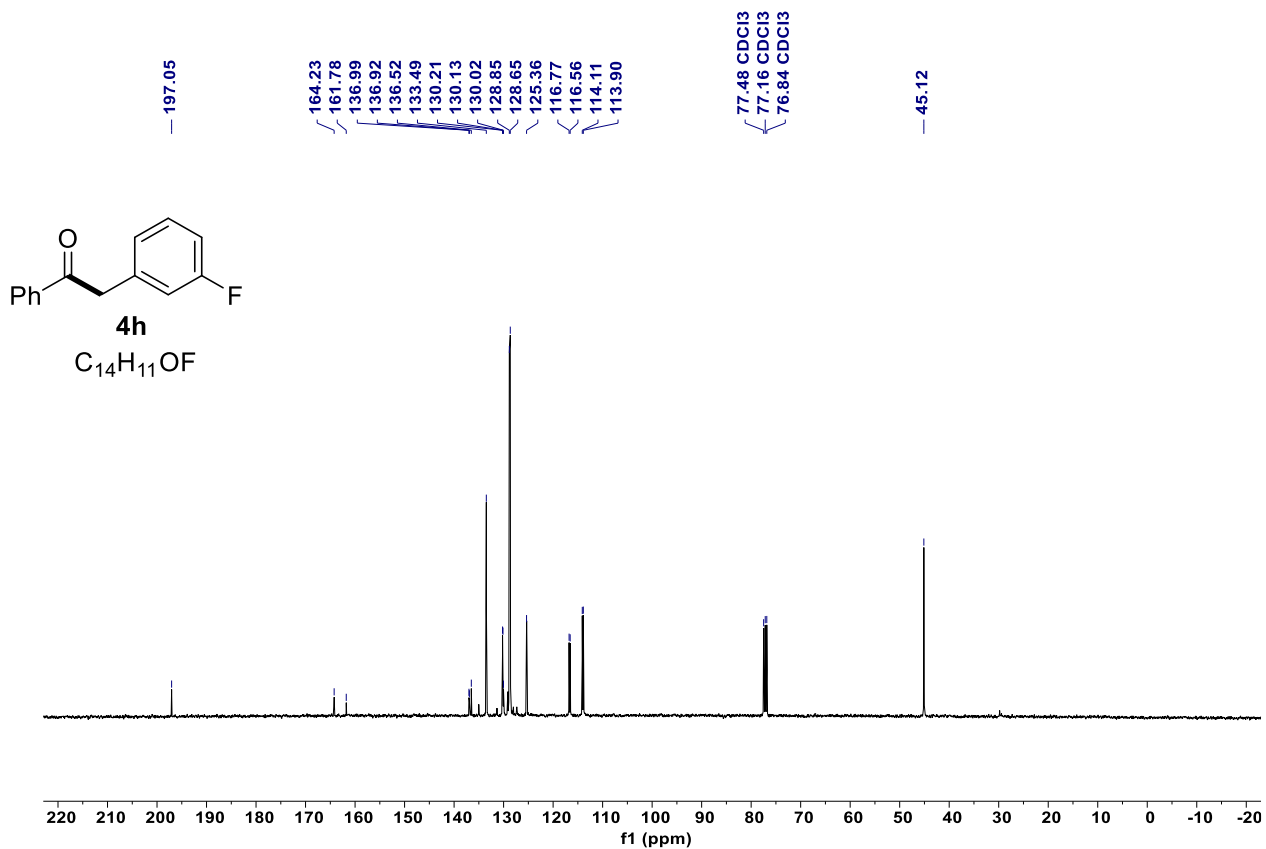

$^{19}F$  NMR spectrum ( $CDCl_3$ , 376 MHz) of the compound **4h**.



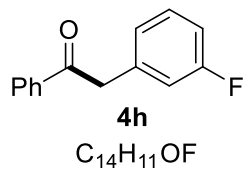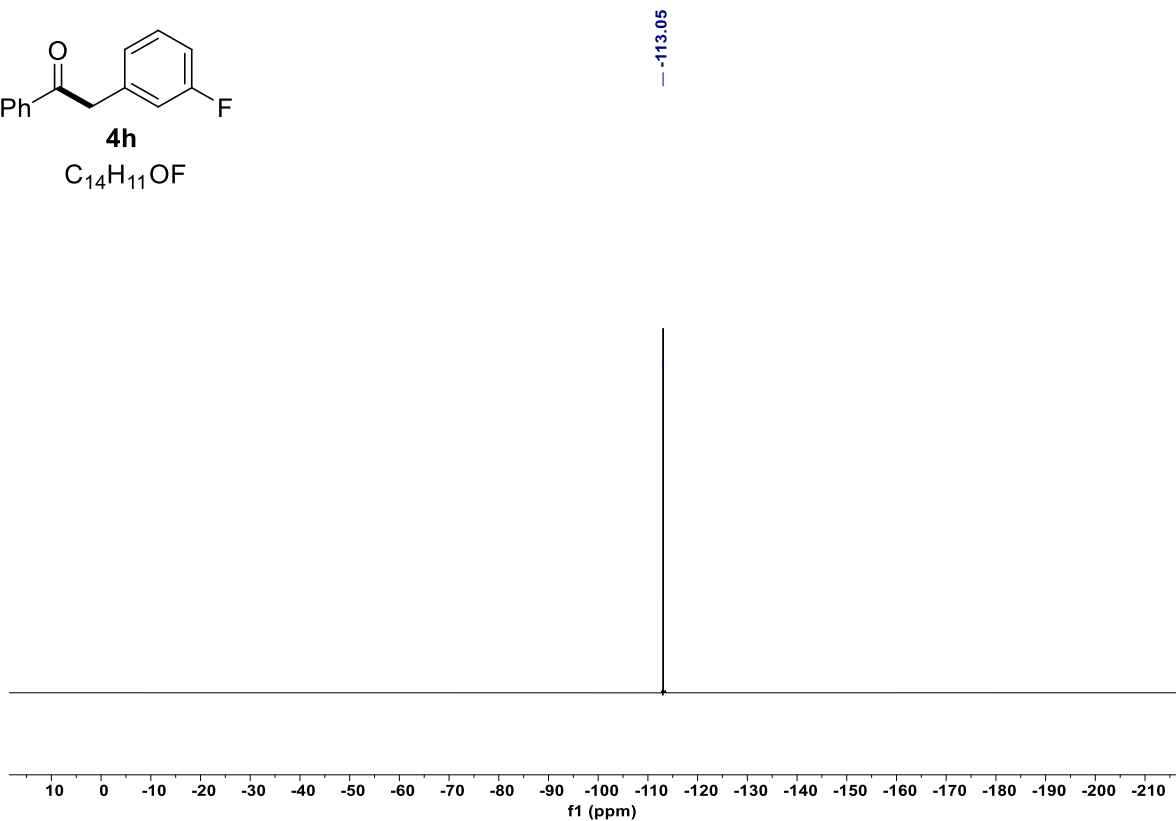

$^1H$  NMR spectrum (400 MHz,  $CDCl_3$ ) of compound **4i**

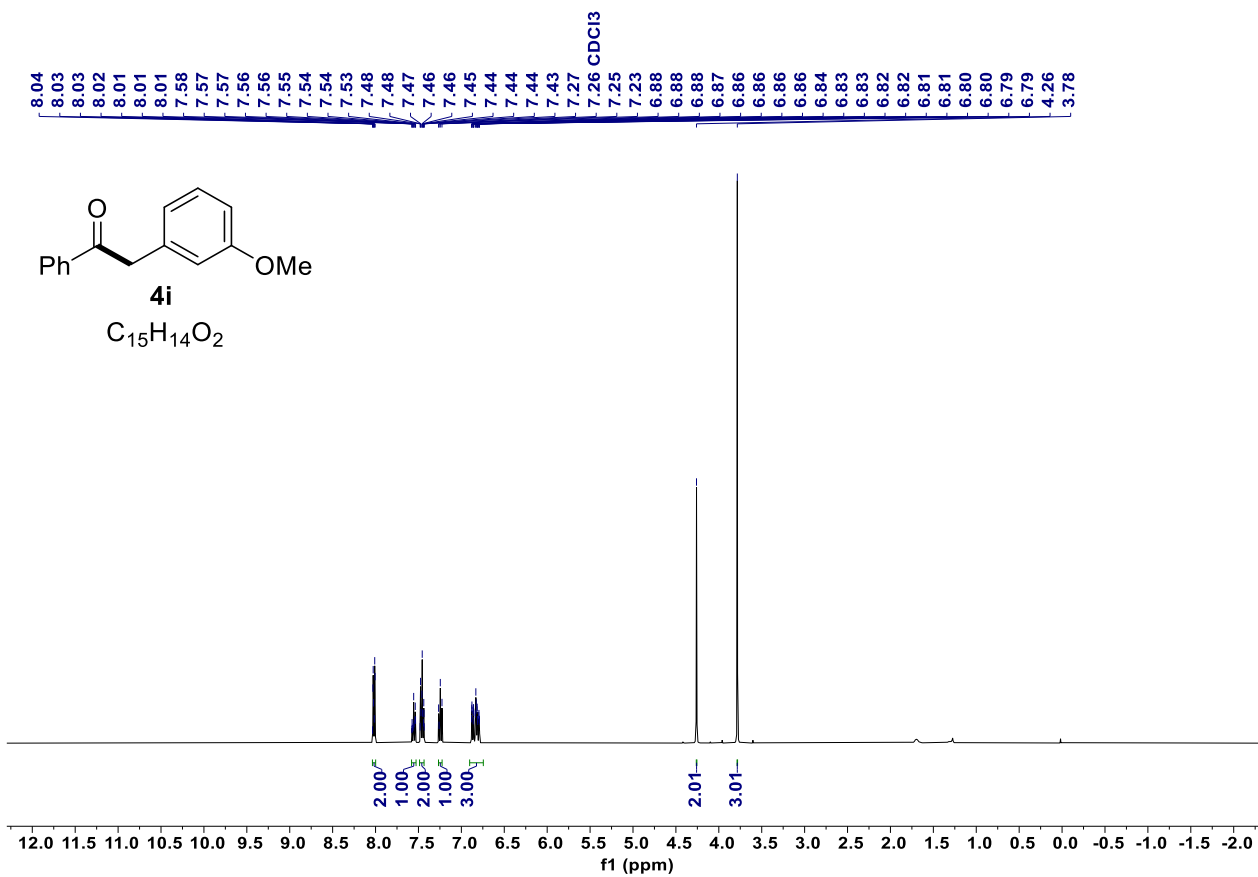

$^{13}C\{^1H\}$  NMR spectrum (100 MHz,  $CDCl_3$ ) of compound **4i**.

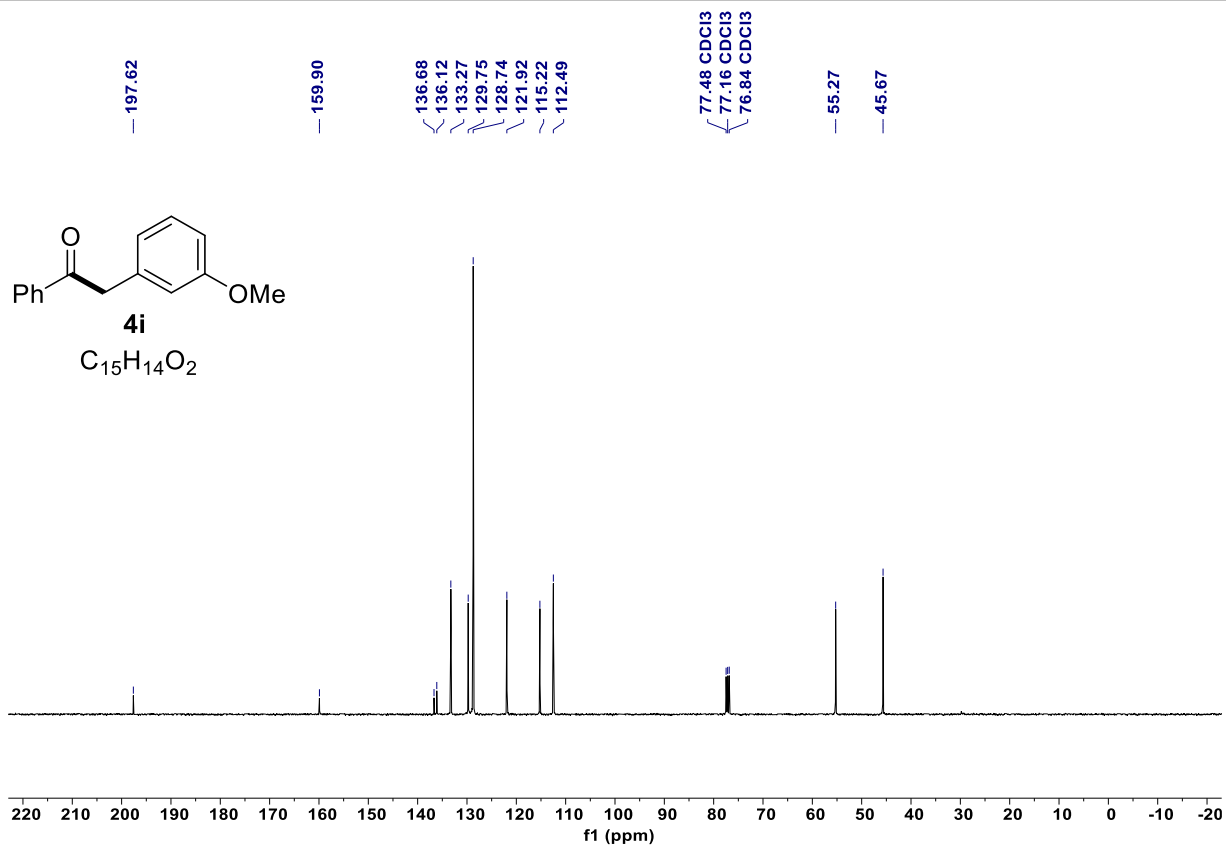

$^1H$  NMR spectrum (400 MHz,  $CDCl_3$ ) of compound **4j**

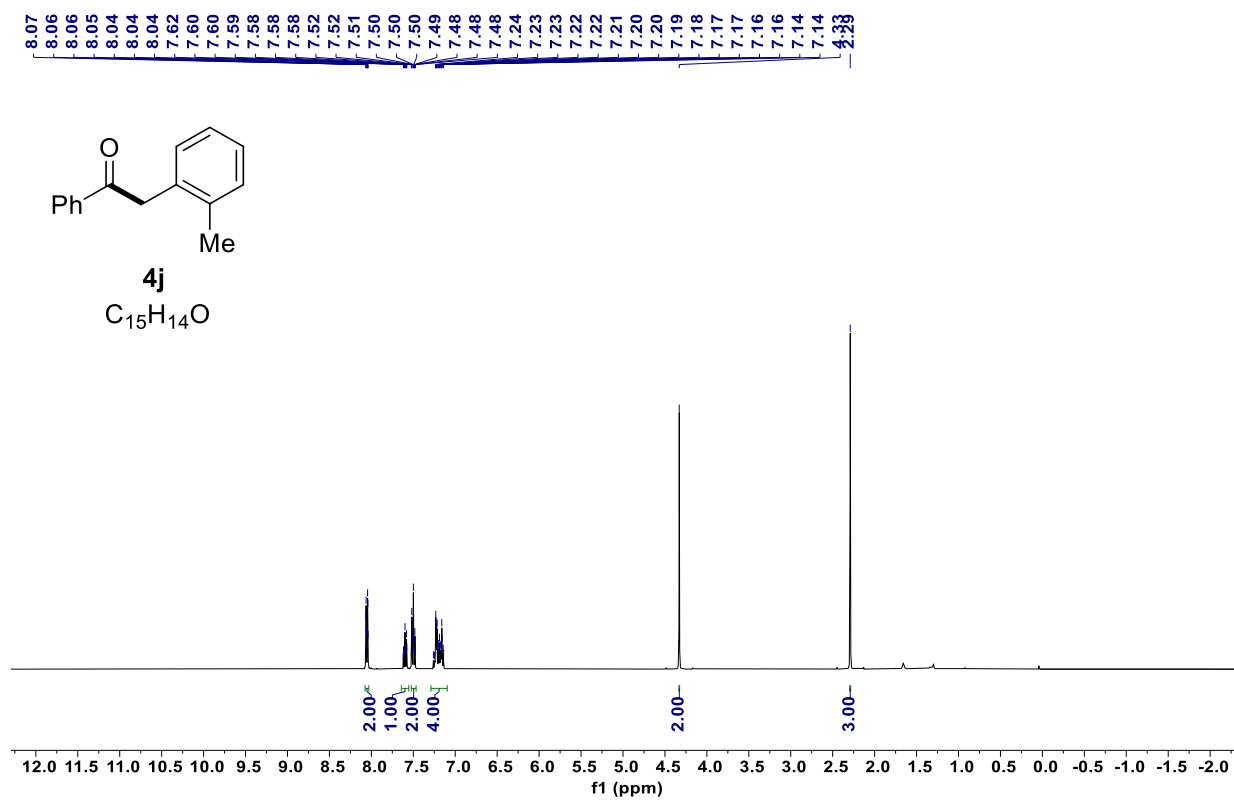

$^{13}C\{^1H\}$  NMR spectrum (100 MHz,  $CDCl_3$ ) of compound **4j**.

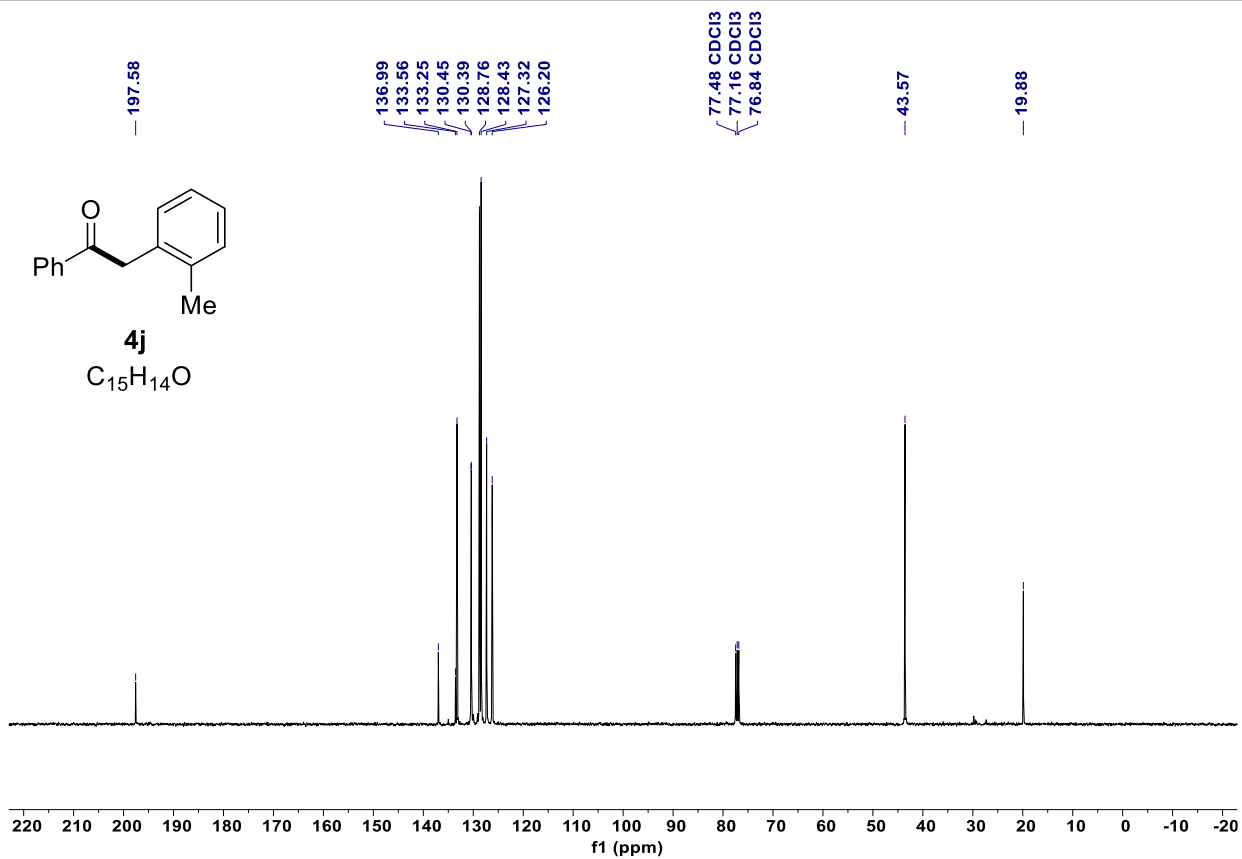

$^1H$  NMR spectrum (400 MHz,  $CDCl_3$ ) of compound **4k**

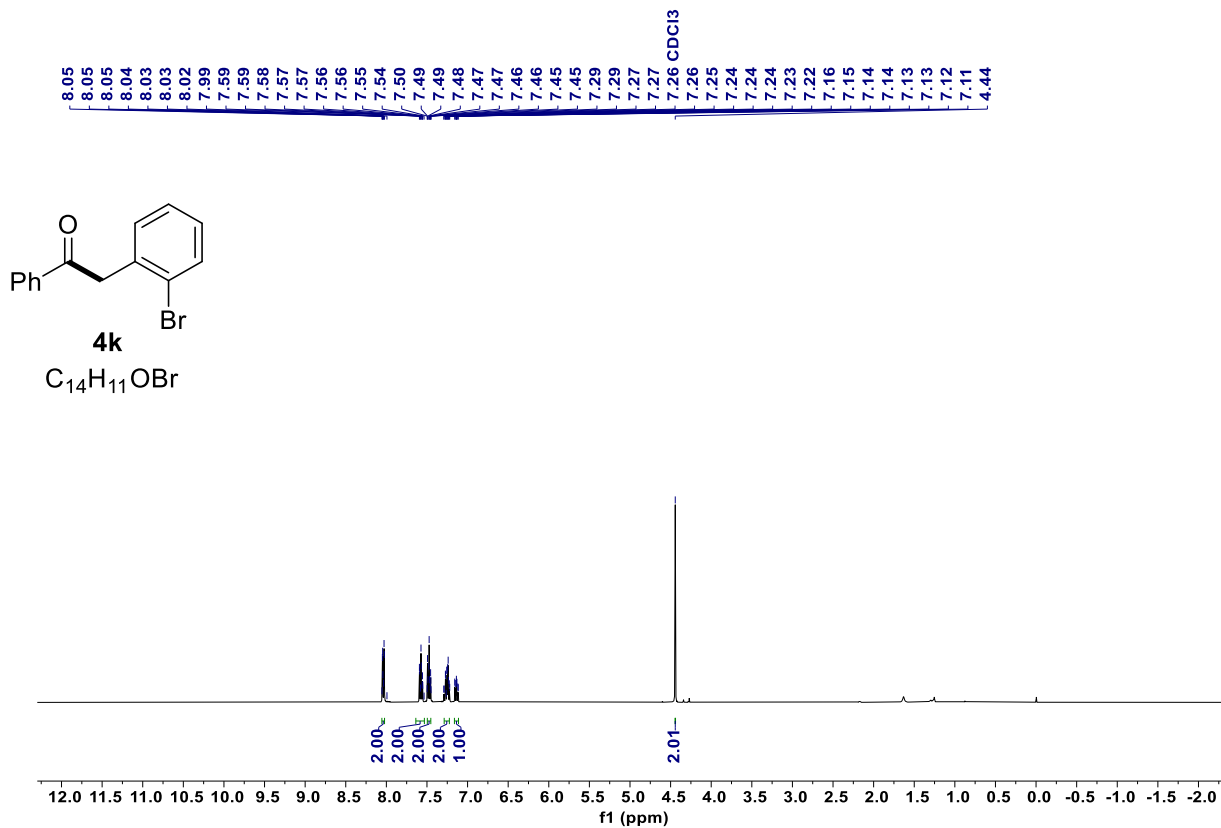

$^{13}C\{^1H\}$  NMR spectrum (100 MHz,  $CDCl_3$ ) of compound **4k**.

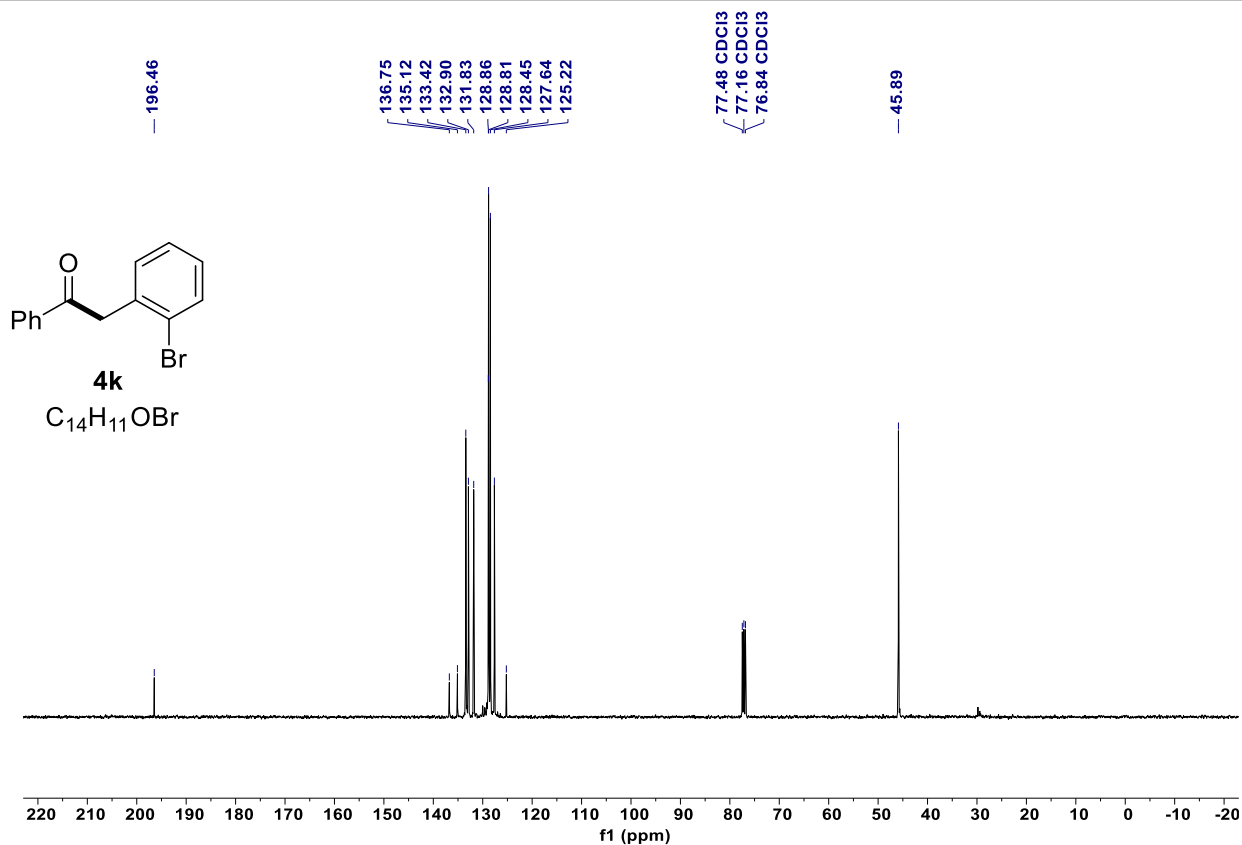

$^1H$  NMR spectrum (400 MHz,  $CDCl_3$ ) of compound **4l**

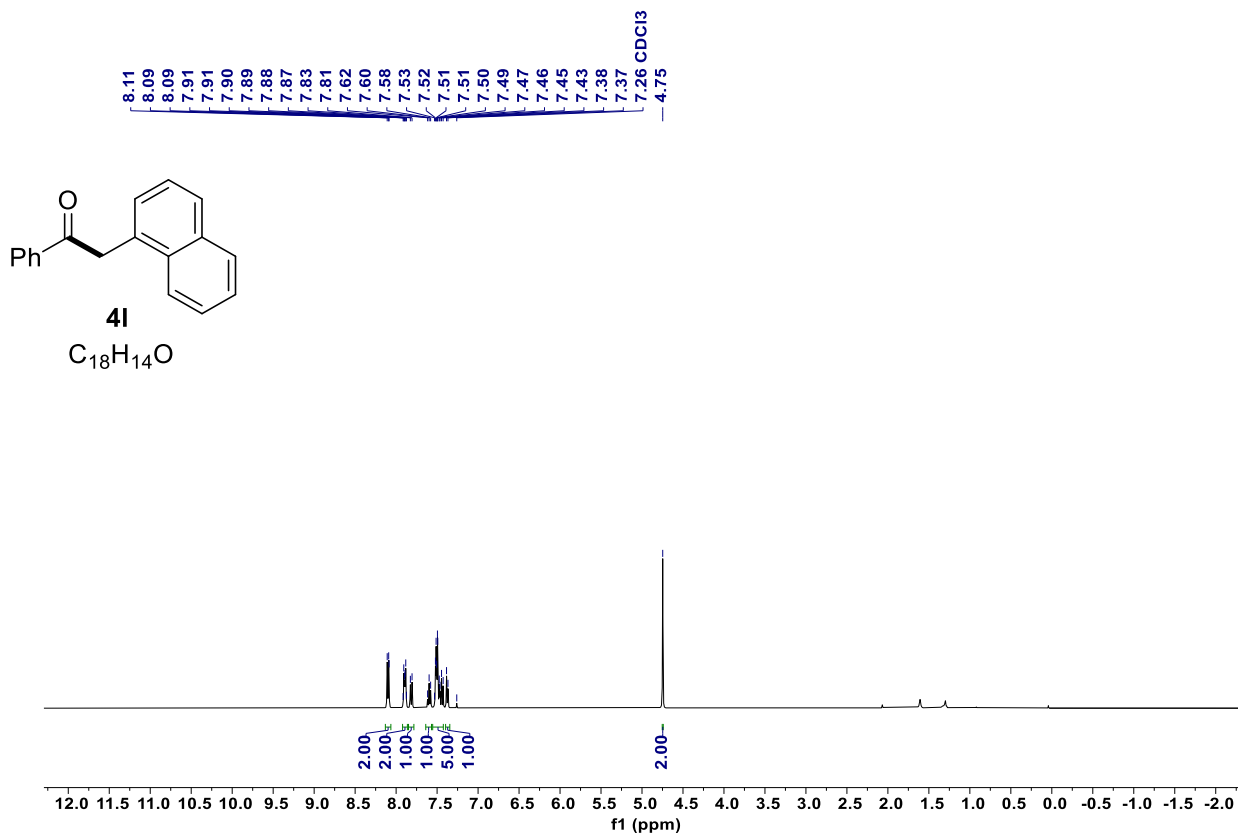

$^{13}C\{^1H\}$  NMR spectrum (100 MHz,  $CDCl_3$ ) of compound **4l**.

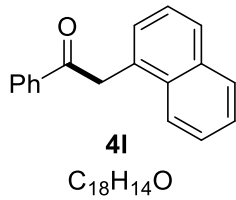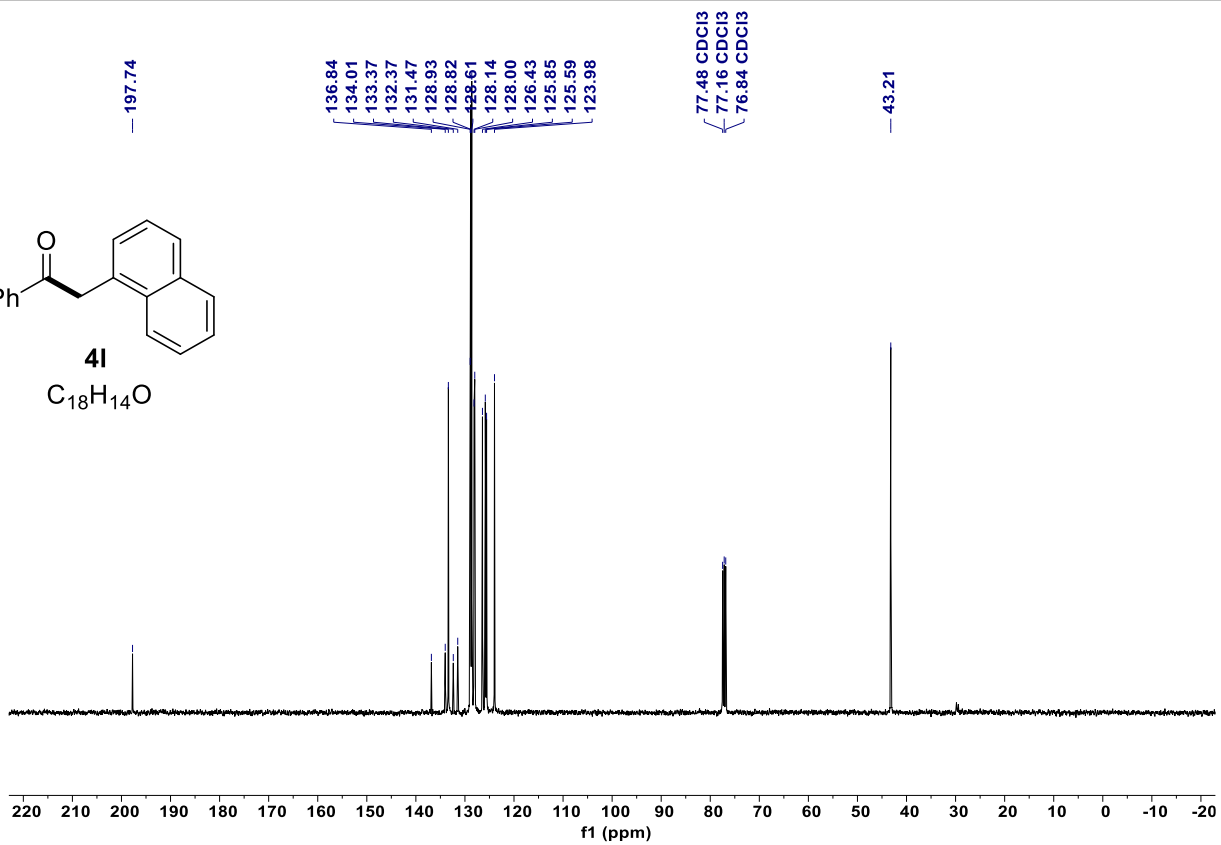

---

## 5. Energies and Cartesian Coordinates of the Optimized Structures

### 4CzIPN

B3LYP/6-31G(d,p) Electronic Energy: -2481.8307517 a. u.

B3LYP/6-31G(d,p) Gibbs free Energy: -2481.189211 a. u.

B3LYP-D3(SMD-THF) Electronic Energy: -2482.7787559 a. u.

---

| Center<br>Number | Atomic<br>Number | Atomic<br>Type | Coordinates (Angstroms) |           |           |
|------------------|------------------|----------------|-------------------------|-----------|-----------|
|                  |                  |                | X                       | Y         | Z         |
| 1                | 6                | 0              | 0.498723                | -1.047259 | 0.675747  |
| 2                | 6                | 0              | -0.194865               | -0.001396 | 0.012914  |
| 3                | 6                | 0              | 0.549259                | 1.014713  | -0.641306 |
| 4                | 6                | 0              | 1.963815                | 0.958310  | -0.652593 |
| 5                | 6                | 0              | 2.653182                | -0.059806 | 0.030636  |
| 6                | 6                | 0              | 1.914186                | -1.048777 | 0.704750  |
| 7                | 6                | 0              | 2.612087                | -2.004406 | 1.512420  |
| 8                | 7                | 0              | 3.188227                | -2.755782 | 2.186677  |
| 9                | 6                | 0              | 2.710293                | 1.884190  | -1.451427 |
| 10               | 7                | 0              | 3.326181                | 2.610903  | -2.117530 |
| 11               | 7                | 0              | 4.061010                | -0.088589 | 0.039540  |
| 12               | 6                | 0              | 4.867742                | -1.029382 | -0.625939 |
| 13               | 6                | 0              | 4.896907                | 0.818922  | 0.715126  |
| 14               | 6                | 0              | 4.491873                | -2.093217 | -1.444561 |
| 15               | 6                | 0              | 6.224775                | -0.717903 | -0.374871 |
| 16               | 6                | 0              | 6.243212                | 0.452790  | 0.480688  |
| 17               | 6                | 0              | 4.554329                | 1.897194  | 1.529424  |
| 18               | 6                | 0              | 5.507647                | -2.866533 | -2.003502 |
| 19               | 1                | 0              | 3.448986                | -2.312164 | -1.648412 |
| 20               | 6                | 0              | 7.225365                | -1.508781 | -0.949640 |
| 21               | 6                | 0              | 7.267827                | 1.202713  | 1.067930  |
| 22               | 6                | 0              | 5.593593                | 2.628880  | 2.101088  |
| 23               | 1                | 0              | 3.518714                | 2.158147  | 1.720498  |
| 24               | 6                | 0              | 6.860340                | -2.581317 | -1.758451 |
| 25               | 1                | 0              | 5.244357                | -3.703927 | -2.642378 |
| 26               | 1                | 0              | 8.272696                | -1.285199 | -0.769804 |
| 27               | 6                | 0              | 6.936561                | 2.289216  | 1.872565  |
| 28               | 1                | 0              | 8.307392                | 0.936988  | 0.900877  |
| 29               | 1                | 0              | 5.356559                | 3.476296  | 2.736985  |
| 30               | 7                | 0              | -0.083516               | 2.072591  | -1.322422 |
| 31               | 6                | 0              | -0.896236               | 1.965873  | -2.469455 |
| 32               | 6                | 0              | 0.055396                | 3.439897  | -1.005427 |
| 33               | 6                | 0              | -1.247273               | 0.835498  | -3.204830 |
| 34               | 6                | 0              | -1.297195               | 3.264439  | -2.861992 |
| 35               | 6                | 0              | -0.700453               | 4.198477  | -1.928424 |
| 36               | 6                | 0              | 0.758219                | 4.042648  | 0.038172  |
| 37               | 6                | 0              | -2.046643               | 1.019483  | -4.331656 |
| 38               | 1                | 0              | -0.918258               | -0.156040 | -2.919426 |
| 39               | 6                | 0              | -2.097867               | 3.423836  | -3.997692 |
| 40               | 6                | 0              | -0.745886               | 5.590535  | -1.801131 |
| 41               | 6                | 0              | 0.700198                | 5.431478  | 0.142570  |
| 42               | 1                | 0              | 1.341890                | 3.460822  | 0.743674  |
| 43               | 6                | 0              | -2.473928               | 2.297563  | -4.723828 |
| 44               | 1                | 0              | -2.340516               | 0.152768  | -4.915481 |
| 45               | 1                | 0              | -2.412308               | 4.414466  | -4.312385 |
| 46               | 6                | 0              | -0.043342               | 6.200516  | -0.765803 |
| 47               | 1                | 0              | -1.323238               | 6.186233  | -2.501864 |
| 48               | 1                | 0              | 1.246588                | 5.924076  | 0.940943  |

|    |   |   |           |           |           |
|----|---|---|-----------|-----------|-----------|
| 49 | 7 | 0 | -1.605966 | 0.028080  | 0.004633  |
| 50 | 6 | 0 | -2.450531 | -0.938919 | -0.577405 |
| 51 | 6 | 0 | -2.415532 | 1.030414  | 0.576597  |
| 52 | 6 | 0 | -2.123800 | -2.089777 | -1.294080 |
| 53 | 6 | 0 | -3.795238 | -0.548289 | -0.377660 |
| 54 | 6 | 0 | -3.773146 | 0.697621  | 0.360250  |
| 55 | 6 | 0 | -2.048639 | 2.166105  | 1.297991  |
| 56 | 6 | 0 | -3.169805 | -2.863884 | -1.793974 |
| 57 | 1 | 0 | -1.095479 | -2.389715 | -1.455374 |
| 58 | 6 | 0 | -4.828130 | -1.340026 | -0.890076 |
| 59 | 6 | 0 | -4.777414 | 1.532844  | 0.860427  |
| 60 | 6 | 0 | -3.066582 | 2.984329  | 1.785377  |
| 61 | 1 | 0 | -1.010470 | 2.421615  | 1.472189  |
| 62 | 6 | 0 | -4.509715 | -2.497873 | -1.593704 |
| 63 | 1 | 0 | -2.936975 | -3.769487 | -2.345568 |
| 64 | 1 | 0 | -5.864470 | -1.050270 | -0.743743 |
| 65 | 6 | 0 | -4.418369 | 2.676024  | 1.568469  |
| 66 | 1 | 0 | -5.823343 | 1.287675  | 0.701369  |
| 67 | 1 | 0 | -2.801957 | 3.879167  | 2.340188  |
| 68 | 7 | 0 | -0.185307 | -2.078774 | 1.347691  |
| 69 | 6 | 0 | -0.098561 | -3.450336 | 1.030414  |
| 70 | 6 | 0 | -1.008840 | -1.939810 | 2.483514  |
| 71 | 6 | 0 | 0.592896  | -4.080439 | -0.004576 |
| 72 | 6 | 0 | -0.897790 | -4.178029 | 1.941649  |
| 73 | 6 | 0 | -1.468479 | -3.221127 | 2.868310  |
| 74 | 6 | 0 | -1.323559 | -0.796657 | 3.215576  |
| 75 | 6 | 0 | 0.478903  | -5.465570 | -0.112136 |
| 76 | 1 | 0 | 1.209687  | -3.522434 | -0.701072 |
| 77 | 6 | 0 | -0.998968 | -5.566869 | 1.811419  |
| 78 | 6 | 0 | -2.291092 | -3.348542 | 3.992284  |
| 79 | 6 | 0 | -2.145727 | -0.948679 | 4.330699  |
| 80 | 1 | 0 | -0.950138 | 0.180796  | 2.936340  |
| 81 | 6 | 0 | -0.308131 | -6.204213 | 0.784725  |
| 82 | 1 | 0 | 1.015280  | -5.979429 | -0.903865 |
| 83 | 1 | 0 | -1.610074 | -6.138955 | 2.503139  |
| 84 | 6 | 0 | -2.630780 | -2.208455 | 4.714781  |
| 85 | 1 | 0 | -2.650530 | -4.325689 | 4.300893  |
| 86 | 1 | 0 | -2.411955 | -0.071172 | 4.911663  |
| 87 | 1 | 0 | -0.067475 | 7.280391  | -0.659494 |
| 88 | 1 | 0 | 7.723044  | 2.879074  | 2.332526  |
| 89 | 1 | 0 | 7.627918  | -3.202624 | -2.208831 |
| 90 | 1 | 0 | -0.375463 | -7.282042 | 0.676257  |
| 91 | 1 | 0 | -5.302132 | -3.122328 | -1.994107 |
| 92 | 1 | 0 | -3.268684 | -2.293399 | 5.588878  |
| 93 | 1 | 0 | -5.188185 | 3.333845  | 1.959427  |
| 94 | 1 | 0 | -3.095349 | 2.407318  | -5.606998 |

#### 4CzIPN<sup>-</sup>

B3LYP/6-31G(d,p) Electronic Energy: -2481.8904876 a.u.

B3LYP/6-31G(d,p) Gibbs free Energy: -2481.255434 a.u.

B3LYP-D3(SMD-THF) Electronic Energy: -2482.8822779 a.u.

| Center<br>Number | Atomic<br>Number | Atomic<br>Type | Coordinates (Angstroms) |           |           |
|------------------|------------------|----------------|-------------------------|-----------|-----------|
|                  |                  |                | X                       | Y         | Z         |
| 1                | 6                | 0              | 0.456440                | -1.004760 | 0.740030  |
| 2                | 6                | 0              | -0.209315               | -0.001353 | 0.012015  |
| 3                | 6                | 0              | 0.506143                | 0.973712  | -0.707179 |
| 4                | 6                | 0              | 1.968109                | 0.909285  | -0.741896 |
| 5                | 6                | 0              | 2.627189                | -0.059347 | 0.030135  |

|    |   |   |           |           |           |
|----|---|---|-----------|-----------|-----------|
| 6  | 6 | 0 | 1.919280  | -1.000043 | 0.793333  |
| 7  | 6 | 0 | 2.610982  | -1.887057 | 1.653941  |
| 8  | 7 | 0 | 3.172275  | -2.623723 | 2.368441  |
| 9  | 6 | 0 | 2.706265  | 1.766915  | -1.593609 |
| 10 | 7 | 0 | 3.306193  | 2.479707  | -2.300903 |
| 11 | 7 | 0 | 4.053884  | -0.088522 | 0.039260  |
| 12 | 6 | 0 | 4.854671  | -1.001968 | -0.646448 |
| 13 | 6 | 0 | 4.882481  | 0.791961  | 0.734942  |
| 14 | 6 | 0 | 4.476182  | -2.053676 | -1.482879 |
| 15 | 6 | 0 | 6.217949  | -0.704444 | -0.390884 |
| 16 | 6 | 0 | 6.235644  | 0.439379  | 0.496203  |
| 17 | 6 | 0 | 4.536582  | 1.858299  | 1.566950  |
| 18 | 6 | 0 | 5.487344  | -2.815709 | -2.061552 |
| 19 | 1 | 0 | 3.429933  | -2.267556 | -1.670972 |
| 20 | 6 | 0 | 7.214175  | -1.486872 | -0.985836 |
| 21 | 6 | 0 | 7.255306  | 1.180892  | 1.103729  |
| 22 | 6 | 0 | 5.570542  | 2.578820  | 2.158375  |
| 23 | 1 | 0 | 3.497609  | 2.114448  | 1.742147  |
| 24 | 6 | 0 | 6.844171  | -2.539325 | -1.818015 |
| 25 | 1 | 0 | 5.219223  | -3.641805 | -2.714244 |
| 26 | 1 | 0 | 8.263417  | -1.272453 | -0.800875 |
| 27 | 6 | 0 | 6.917967  | 2.247614  | 1.931605  |
| 28 | 1 | 0 | 8.297210  | 0.924079  | 0.931739  |
| 29 | 1 | 0 | 5.328052  | 3.415217  | 2.807967  |
| 30 | 7 | 0 | -0.135995 | 2.032501  | -1.406203 |
| 31 | 6 | 0 | -0.800168 | 1.944190  | -2.634112 |
| 32 | 6 | 0 | -0.073333 | 3.383093  | -1.049467 |
| 33 | 6 | 0 | -1.049634 | 0.820635  | -3.423797 |
| 34 | 6 | 0 | -1.214556 | 3.239729  | -3.038245 |
| 35 | 6 | 0 | -0.748613 | 4.160599  | -2.024155 |
| 36 | 6 | 0 | 0.535307  | 3.973937  | 0.060891  |
| 37 | 6 | 0 | -1.741264 | 1.004915  | -4.617979 |
| 38 | 1 | 0 | -0.716421 | -0.162458 | -3.114565 |
| 39 | 6 | 0 | -1.911749 | 3.398008  | -4.241353 |
| 40 | 6 | 0 | -0.831111 | 5.548263  | -1.863822 |
| 41 | 6 | 0 | 0.443812  | 5.356857  | 0.194801  |
| 42 | 1 | 0 | 1.076271  | 3.373338  | 0.784063  |
| 43 | 6 | 0 | -2.174865 | 2.278551  | -5.025335 |
| 44 | 1 | 0 | -1.949417 | 0.142810  | -5.245447 |
| 45 | 1 | 0 | -2.235570 | 4.384883  | -4.561660 |
| 46 | 6 | 0 | -0.236627 | 6.140547  | -0.753217 |
| 47 | 1 | 0 | -1.349310 | 6.155646  | -2.601307 |
| 48 | 1 | 0 | 0.915253  | 5.838298  | 1.047155  |
| 49 | 7 | 0 | -1.641211 | 0.028231  | 0.003007  |
| 50 | 6 | 0 | -2.475965 | -0.878226 | -0.656437 |
| 51 | 6 | 0 | -2.445911 | 0.969009  | 0.651684  |
| 52 | 6 | 0 | -2.142688 | -1.978779 | -1.449021 |
| 53 | 6 | 0 | -3.828506 | -0.514533 | -0.431176 |
| 54 | 6 | 0 | -3.809392 | 0.662536  | 0.408071  |
| 55 | 6 | 0 | -2.077316 | 2.054570  | 1.449285  |
| 56 | 6 | 0 | -3.181180 | -2.717567 | -2.009425 |
| 57 | 1 | 0 | -1.109558 | -2.260749 | -1.609326 |
| 58 | 6 | 0 | -4.854252 | -1.272846 | -1.006869 |
| 59 | 6 | 0 | -4.809981 | 1.463464  | 0.970165  |
| 60 | 6 | 0 | -3.091237 | 2.836569  | 1.995871  |
| 61 | 1 | 0 | -1.035462 | 2.292589  | 1.623767  |
| 62 | 6 | 0 | -4.526300 | -2.372447 | -1.793804 |
| 63 | 1 | 0 | -2.941266 | -3.582865 | -2.620681 |
| 64 | 1 | 0 | -5.893741 | -1.002619 | -0.840956 |
| 65 | 6 | 0 | -4.446660 | 2.548428  | 1.761868  |
| 66 | 1 | 0 | -5.857592 | 1.237228  | 0.790130  |



|    |   |   |           |           |           |
|----|---|---|-----------|-----------|-----------|
| 67 | 1 | 0 | -2.823395 | 3.690993  | 2.610810  |
| 68 | 7 | 0 | -0.237276 | -2.036193 | 1.430665  |
| 69 | 6 | 0 | -0.226125 | -3.388208 | 1.074062  |
| 70 | 6 | 0 | -0.912270 | -1.920499 | 2.650369  |
| 71 | 6 | 0 | 0.371518  | -4.003691 | -0.028847 |
| 72 | 6 | 0 | -0.945043 | -4.137117 | 2.039875  |
| 73 | 6 | 0 | -1.384828 | -3.197797 | 3.048714  |
| 74 | 6 | 0 | -1.124617 | -0.787611 | 3.437566  |
| 75 | 6 | 0 | 0.224545  | -5.381631 | -0.164697 |
| 76 | 1 | 0 | 0.946103  | -3.425906 | -0.744633 |
| 77 | 6 | 0 | -1.082914 | -5.520164 | 1.877710  |
| 78 | 6 | 0 | -2.102440 | -3.327151 | 4.243251  |
| 79 | 6 | 0 | -1.837541 | -0.943200 | 4.623284  |
| 80 | 1 | 0 | -0.747402 | 0.180888  | 3.132860  |
| 81 | 6 | 0 | -0.499640 | -6.136494 | 0.774262  |
| 82 | 1 | 0 | 0.686355  | -5.882154 | -1.011312 |
| 83 | 1 | 0 | -1.634973 | -6.105628 | 2.608320  |
| 84 | 6 | 0 | -2.328353 | -2.197826 | 5.024674  |
| 85 | 1 | 0 | -2.470707 | -4.299786 | 4.559062  |
| 86 | 1 | 0 | -2.017361 | -0.073269 | 5.248707  |
| 87 | 1 | 0 | -0.289737 | 7.217416  | -0.620737 |
| 88 | 1 | 0 | 7.700841  | 2.830900  | 2.407866  |
| 89 | 1 | 0 | 7.608606  | -3.154019 | -2.284628 |
| 90 | 1 | 0 | -0.595666 | -7.210228 | 0.640508  |
| 91 | 1 | 0 | -5.313367 | -2.970571 | -2.243956 |
| 92 | 1 | 0 | -2.883680 | -2.284944 | 5.954280  |
| 93 | 1 | 0 | -5.213846 | 3.179255  | 2.201582  |
| 94 | 1 | 0 | -2.714923 | 2.388056  | -5.961548 |

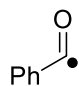

B3LYP/6-31G(d,p) Electronic Energy: -344.921214 a. u.  
 B3LYP/6-31G(d,p) Gibbs free Energy: -344.854813 a. u.  
 B3LYP-D3(SMD-THF) Electronic Energy: -345.0617292 a. u.

| Center Number | Atomic Number | Atomic Type | Coordinates (Angstroms) |           |          |
|---------------|---------------|-------------|-------------------------|-----------|----------|
|               |               |             | X                       | Y         | Z        |
| 1             | 6             | 0           | 2.136330                | -5.754913 | 3.070358 |
| 2             | 6             | 0           | 1.546897                | -5.005114 | 2.053580 |
| 3             | 6             | 0           | 1.045942                | -3.726515 | 2.329734 |
| 4             | 6             | 0           | 1.136143                | -3.196396 | 3.629181 |
| 5             | 6             | 0           | 1.725435                | -3.948525 | 4.640343 |
| 6             | 6             | 0           | 2.224595                | -5.226213 | 4.360420 |
| 7             | 1             | 0           | 2.525760                | -6.746449 | 2.860393 |
| 8             | 1             | 0           | 1.467083                | -5.395238 | 1.043381 |
| 9             | 1             | 0           | 0.741553                | -2.203337 | 3.820553 |
| 10            | 1             | 0           | 1.798480                | -3.545683 | 5.646422 |
| 11            | 1             | 0           | 2.684087                | -5.810338 | 5.152790 |
| 12            | 6             | 0           | 0.422349                | -2.944825 | 1.235829 |
| 13            | 8             | 0           | -0.052039               | -1.849104 | 1.290252 |

### CO<sub>2</sub>

B3LYP/6-31G(d,p) Electronic Energy: -188.6617569 a. u.  
 B3LYP/6-31G(d,p) Gibbs free Energy: -188.6617569 a. u.  
 B3LYP-D3(SMD-THF) Electronic Energy: -188.6617569 a. u.

| Center | Atomic | Atomic | Coordinates (Angstroms) |  |  |
|--------|--------|--------|-------------------------|--|--|
|--------|--------|--------|-------------------------|--|--|

| Number | Number | Type | X         | Y         | Z         |
|--------|--------|------|-----------|-----------|-----------|
| 1      | 6      | 0    | 0.122602  | -3.288960 | -0.600587 |
| 2      | 8      | 0    | 0.635602  | -4.333130 | -0.484717 |
| 3      | 8      | 0    | -0.390706 | -2.245169 | -0.718398 |

### Quartet anionic Cr<sup>I</sup>Cl<sub>2</sub>/dtbbpy (LCr<sup>I</sup>Cl<sub>2</sub>)

B3LYP/6-31G(d,p) Electronic Energy: -1816.7975047 a. u.

B3LYP/6-31G(d,p) Gibbs free Energy: -1816.466922 a. u.

B3LYP-D3(SMD-THF) Electronic Energy: -1817.9376363 a. u.

| Center Number | Atomic Number | Atomic Type | Coordinates (Angstroms) |           |           |
|---------------|---------------|-------------|-------------------------|-----------|-----------|
|               |               |             | X                       | Y         | Z         |
| 1             | 6             | 0           | -3.079944               | 0.794106  | -0.178347 |
| 2             | 6             | 0           | -1.178837               | 1.860133  | -0.969003 |
| 3             | 6             | 0           | -1.721595               | 3.116010  | -0.708856 |
| 4             | 6             | 0           | -3.002042               | 3.228410  | -0.158149 |
| 5             | 6             | 0           | -3.673152               | 2.023334  | 0.102787  |
| 6             | 6             | 0           | -3.738187               | -0.511493 | 0.074636  |
| 7             | 6             | 0           | -3.537236               | -2.817218 | -0.063491 |
| 8             | 6             | 0           | -4.807059               | -3.004167 | 0.476938  |
| 9             | 6             | 0           | -5.587640               | -1.901113 | 0.836681  |
| 10            | 6             | 0           | -5.014615               | -0.638156 | 0.619301  |
| 11            | 1             | 0           | -0.188674               | 1.730733  | -1.395962 |
| 12            | 1             | 0           | -1.127050               | 3.989273  | -0.944274 |
| 13            | 1             | 0           | -4.667892               | 2.048378  | 0.529044  |
| 14            | 1             | 0           | -2.900572               | -3.647248 | -0.355318 |
| 15            | 1             | 0           | -5.163754               | -4.017718 | 0.607120  |
| 16            | 1             | 0           | -5.572595               | 0.252437  | 0.878861  |
| 17            | 7             | 0           | -1.835002               | 0.718633  | -0.713263 |
| 18            | 7             | 0           | -3.005429               | -1.602361 | -0.264180 |
| 19            | 6             | 0           | -3.672314               | 4.573232  | 0.157968  |
| 20            | 6             | 0           | -4.986317               | 4.687673  | -0.652214 |
| 21            | 6             | 0           | -3.989331               | 4.638366  | 1.671708  |
| 22            | 6             | 0           | -2.769802               | 5.767635  | -0.203887 |
| 23            | 1             | 0           | -4.791718               | 4.642815  | -1.728448 |
| 24            | 1             | 0           | -5.693310               | 3.889976  | -0.404818 |
| 25            | 1             | 0           | -5.475954               | 5.642771  | -0.435682 |
| 26            | 1             | 0           | -3.076327               | 4.557640  | 2.270090  |
| 27            | 1             | 0           | -4.468661               | 5.593105  | 1.911615  |
| 28            | 1             | 0           | -4.668335               | 3.839472  | 1.984903  |
| 29            | 1             | 0           | -3.285933               | 6.701709  | 0.037171  |
| 30            | 1             | 0           | -1.831231               | 5.756225  | 0.359460  |
| 31            | 1             | 0           | -2.530898               | 5.790624  | -1.271970 |
| 32            | 6             | 0           | -6.995377               | -2.020730 | 1.438117  |
| 33            | 6             | 0           | -7.008129               | -1.354454 | 2.835273  |
| 34            | 6             | 0           | -8.005565               | -1.301541 | 0.511633  |
| 35            | 6             | 0           | -7.434541               | -3.488778 | 1.593209  |
| 36            | 1             | 0           | -6.299713               | -1.842727 | 3.511947  |
| 37            | 1             | 0           | -6.749716               | -0.292244 | 2.787261  |
| 38            | 1             | 0           | -8.007197               | -1.432413 | 3.276422  |
| 39            | 1             | 0           | -8.016522               | -1.752189 | -0.485840 |
| 40            | 1             | 0           | -9.014733               | -1.378173 | 0.929426  |
| 41            | 1             | 0           | -7.774701               | -0.238036 | 0.397597  |
| 42            | 1             | 0           | -8.439915               | -3.525736 | 2.023167  |
| 43            | 1             | 0           | -7.469723               | -4.008856 | 0.630561  |
| 44            | 1             | 0           | -6.770631               | -4.045600 | 2.262218  |
| 45            | 24            | 0           | -1.053485               | -1.247915 | -1.092726 |
| 46            | 17            | 0           | -0.623591               | -3.511692 | -1.328495 |
| 47            | 17            | 0           | 0.939159                | -0.412915 | -1.927856 |

### PhCOCO<sub>2</sub><sup>-</sup> (I)

B3LYP/6-31G(d,p) Electronic Energy: -533.5908956 a. u.

---

B3LYP/6-31G(d,p) Gibbs free Energy: -533.514581 a.u.  
B3LYP-D3(SMD-THF) Electronic Energy: -533.8833244 a.u.

---

| Center<br>Number | Atomic<br>Number | Atomic<br>Type | Coordinates (Angstroms) |           |           |
|------------------|------------------|----------------|-------------------------|-----------|-----------|
|                  |                  |                | X                       | Y         | Z         |
| 1                | 6                | 0              | -3.079944               | 0.794106  | -0.178347 |
| 2                | 6                | 0              | -1.178837               | 1.860133  | -0.969003 |
| 3                | 6                | 0              | -1.721595               | 3.116010  | -0.708856 |
| 4                | 6                | 0              | -3.002042               | 3.228410  | -0.158149 |
| 5                | 6                | 0              | -3.673152               | 2.023334  | 0.102787  |
| 6                | 6                | 0              | -3.738187               | -0.511493 | 0.074636  |
| 7                | 6                | 0              | -3.537236               | -2.817218 | -0.063491 |
| 8                | 6                | 0              | -4.807059               | -3.004167 | 0.476938  |
| 9                | 6                | 0              | -5.587640               | -1.901113 | 0.836681  |
| 10               | 6                | 0              | -5.014615               | -0.638156 | 0.619301  |
| 11               | 1                | 0              | -0.188674               | 1.730733  | -1.395962 |
| 12               | 1                | 0              | -1.127050               | 3.989273  | -0.944274 |
| 13               | 1                | 0              | -4.667892               | 2.048378  | 0.529044  |
| 14               | 1                | 0              | -2.900572               | -3.647248 | -0.355318 |
| 15               | 1                | 0              | -5.163754               | -4.017718 | 0.607120  |
| 16               | 1                | 0              | -5.572595               | 0.252437  | 0.878861  |
| 17               | 7                | 0              | -1.835002               | 0.718633  | -0.713263 |
| 18               | 7                | 0              | -3.005429               | -1.602361 | -0.264180 |
| 19               | 6                | 0              | -3.672314               | 4.573232  | 0.157968  |
| 20               | 6                | 0              | -4.986317               | 4.687673  | -0.652214 |
| 21               | 6                | 0              | -3.989331               | 4.638366  | 1.671708  |
| 22               | 6                | 0              | -2.769802               | 5.767635  | -0.203887 |
| 23               | 1                | 0              | -4.791718               | 4.642815  | -1.728448 |
| 24               | 1                | 0              | -5.693310               | 3.889976  | -0.404818 |
| 25               | 1                | 0              | -5.475954               | 5.642771  | -0.435682 |
| 26               | 1                | 0              | -3.076327               | 4.557640  | 2.270090  |
| 27               | 1                | 0              | -4.468661               | 5.593105  | 1.911615  |
| 28               | 1                | 0              | -4.668335               | 3.839472  | 1.984903  |
| 29               | 1                | 0              | -3.285933               | 6.701709  | 0.037171  |
| 30               | 1                | 0              | -1.831231               | 5.756225  | 0.359460  |
| 31               | 1                | 0              | -2.530898               | 5.790624  | -1.271970 |
| 32               | 6                | 0              | -6.995377               | -2.020730 | 1.438117  |
| 33               | 6                | 0              | -7.008129               | -1.354454 | 2.835273  |
| 34               | 6                | 0              | -8.005565               | -1.301541 | 0.511633  |
| 35               | 6                | 0              | -7.434541               | -3.488778 | 1.593209  |
| 36               | 1                | 0              | -6.299713               | -1.842727 | 3.511947  |
| 37               | 1                | 0              | -6.749716               | -0.292244 | 2.787261  |
| 38               | 1                | 0              | -8.007197               | -1.432413 | 3.276422  |
| 39               | 1                | 0              | -8.016522               | -1.752189 | -0.485840 |
| 40               | 1                | 0              | -9.014733               | -1.378173 | 0.929426  |
| 41               | 1                | 0              | -7.774701               | -0.238036 | 0.397597  |
| 42               | 1                | 0              | -8.439915               | -3.525736 | 2.023167  |
| 43               | 1                | 0              | -7.469723               | -4.008856 | 0.630561  |
| 44               | 1                | 0              | -6.770631               | -4.045600 | 2.262218  |
| 45               | 24               | 0              | -1.053485               | -1.247915 | -1.092726 |
| 46               | 17               | 0              | -0.623591               | -3.511692 | -1.328495 |
| 47               | 17               | 0              | 0.939159                | -0.412915 | -1.927856 |

---

## 2a

B3LYP/6-31G(d,p) Electronic Energy: -1636.8849586 a.u.  
B3LYP/6-31G(d,p) Gibbs free Energy: -1636.480371 a.u.  
B3LYP-D3(SMD-THF) Electronic Energy: -1637.5595671 a.u.

---

| Center | Atomic | Atomic | Coordinates (Angstroms) |  |  |
|--------|--------|--------|-------------------------|--|--|
|--------|--------|--------|-------------------------|--|--|

| Number | Number | Type | X         | Y          | Z         |
|--------|--------|------|-----------|------------|-----------|
| 1      | 6      | 0    | -1.150792 | 0.045689   | -3.218215 |
| 2      | 6      | 0    | -0.732633 | 0.265754   | -1.903523 |
| 3      | 6      | 0    | -0.353277 | -0.806597  | -1.099586 |
| 4      | 6      | 0    | -0.383433 | -2.118212  | -1.593084 |
| 5      | 6      | 0    | -0.803928 | -2.329593  | -2.909847 |
| 6      | 6      | 0    | -1.185116 | -1.254600  | -3.717928 |
| 7      | 1      | 0    | -1.446782 | 0.881191   | -3.845134 |
| 8      | 1      | 0    | -0.702393 | 1.274585   | -1.502847 |
| 9      | 1      | 0    | -0.029788 | -0.625930  | -0.077542 |
| 10     | 1      | 0    | -0.837566 | -3.336376  | -3.315689 |
| 11     | 1      | 0    | -1.508202 | -1.439155  | -4.738287 |
| 12     | 6      | 0    | 0.054181  | -3.227750  | -0.655921 |
| 13     | 1      | 0    | 1.091293  | -3.100850  | -0.349470 |
| 14     | 1      | 0    | -0.540833 | -3.217999  | 0.256927  |
| 15     | 6      | 0    | -1.220192 | -5.298914  | -1.047729 |
| 16     | 6      | 0    | 1.072347  | -5.211013  | -1.706040 |
| 17     | 6      | 0    | -1.280558 | -6.632324  | -1.415452 |
| 18     | 6      | 0    | 1.024177  | -6.558631  | -2.022163 |
| 19     | 6      | 0    | -0.141645 | -7.311045  | -1.858305 |
| 20     | 1      | 0    | -2.204801 | -7.166297  | -1.234783 |
| 21     | 1      | 0    | 1.932444  | -7.026813  | -2.377135 |
| 22     | 7      | 0    | -0.051005 | -4.600314  | -1.210076 |
| 23     | 6      | 0    | -2.385878 | -4.681452  | -0.347491 |
| 24     | 6      | 0    | -2.572962 | -5.003830  | 1.007370  |
| 25     | 6      | 0    | -3.314363 | -3.869635  | -1.011661 |
| 26     | 6      | 0    | -3.678307 | -4.492668  | 1.687721  |
| 27     | 1      | 0    | -1.845757 | -5.643443  | 1.499919  |
| 28     | 6      | 0    | -4.419419 | -3.370926  | -0.321603 |
| 29     | 1      | 0    | -3.177605 | -3.629137  | -2.060380 |
| 30     | 6      | 0    | -4.600534 | -3.678505  | 1.027656  |
| 31     | 1      | 0    | -3.818374 | -4.737309  | 2.736222  |
| 32     | 1      | 0    | -5.138358 | -2.744275  | -0.840613 |
| 33     | 1      | 0    | -5.461310 | -3.287264  | 1.562028  |
| 34     | 6      | 0    | 2.361163  | -4.477142  | -1.850766 |
| 35     | 6      | 0    | 2.542709  | -3.469387  | -2.809427 |
| 36     | 6      | 0    | 3.439781  | -4.882986  | -1.046890 |
| 37     | 6      | 0    | 3.789968  | -2.863285  | -2.954908 |
| 38     | 1      | 0    | 1.719222  | -3.163916  | -3.445197 |
| 39     | 6      | 0    | 4.680558  | -4.265452  | -1.199549 |
| 40     | 1      | 0    | 3.280838  | -5.660668  | -0.307446 |
| 41     | 6      | 0    | 4.859058  | -3.257976  | -2.149094 |
| 42     | 1      | 0    | 3.925097  | -2.086923  | -3.701892 |
| 43     | 1      | 0    | 5.509137  | -4.573815  | -0.569361 |
| 44     | 1      | 0    | 5.829060  | -2.782982  | -2.263639 |
| 45     | 6      | 0    | -0.136140 | -8.772601  | -2.067683 |
| 46     | 6      | 0    | 0.884447  | -9.534766  | -1.473803 |
| 47     | 6      | 0    | -1.138916 | -9.410803  | -2.812573 |
| 48     | 6      | 0    | 0.900750  | -10.917909 | -1.642767 |
| 49     | 1      | 0    | 1.607418  | -9.038019  | -0.832909 |
| 50     | 6      | 0    | -1.106378 | -10.792806 | -2.987915 |
| 51     | 1      | 0    | -1.927165 | -8.822032  | -3.273708 |
| 52     | 6      | 0    | -0.085737 | -11.547274 | -2.405130 |
| 53     | 1      | 0    | 1.679312  | -11.506371 | -1.167065 |
| 54     | 1      | 0    | -1.876082 | -11.280406 | -3.578588 |
| 55     | 1      | 0    | -0.065480 | -12.624998 | -2.537426 |
| 56     | 9      | 0    | 1.612664  | -6.695762  | 2.841498  |
| 57     | 9      | 0    | 1.301151  | -5.107078  | 1.200798  |
| 58     | 9      | 0    | -0.113364 | -6.910670  | 1.326290  |
| 59     | 9      | 0    | 2.066664  | -7.202374  | 0.636936  |

---

|    |   |   |          |           |          |
|----|---|---|----------|-----------|----------|
| 60 | 5 | 0 | 1.222026 | -6.486274 | 1.538899 |
|----|---|---|----------|-----------|----------|

---

**2a**

B3LYP/6-31G(d,p) Electronic Energy: -1636.9516479 a. u.

B3LYP/6-31G(d,p) Gibbs free Energy: -1636.551040 a. u.

B3LYP-D3(SMD-THF) Electronic Energy: -1637.6673859 a. u.

---

| Center<br>Number | Atomic<br>Number | Atomic<br>Type | Coordinates (Angstroms) |            |           |
|------------------|------------------|----------------|-------------------------|------------|-----------|
|                  |                  |                | X                       | Y          | Z         |
| 1                | 6                | 0              | -2.106623               | -0.905445  | -3.231199 |
| 2                | 6                | 0              | -1.742741               | -0.541920  | -1.932697 |
| 3                | 6                | 0              | -0.961306               | -1.396053  | -1.154793 |
| 4                | 6                | 0              | -0.525235               | -2.623933  | -1.671679 |
| 5                | 6                | 0              | -0.885821               | -2.980158  | -2.976483 |
| 6                | 6                | 0              | -1.675840               | -2.127788  | -3.749769 |
| 7                | 1                | 0              | -2.722273               | -0.242414  | -3.833858 |
| 8                | 1                | 0              | -2.074644               | 0.407243   | -1.519749 |
| 9                | 1                | 0              | -0.668506               | -1.124028  | -0.144118 |
| 10               | 1                | 0              | -0.553825               | -3.930103  | -3.385599 |
| 11               | 1                | 0              | -1.953600               | -2.419495  | -4.759688 |
| 12               | 6                | 0              | 0.391883                | -3.469542  | -0.809587 |
| 13               | 1                | 0              | 1.421745                | -3.213035  | -1.058166 |
| 14               | 1                | 0              | 0.274790                | -3.203311  | 0.238902  |
| 15               | 6                | 0              | -0.996770               | -5.547185  | -0.970274 |
| 16               | 6                | 0              | 1.358655                | -5.675969  | -1.496598 |
| 17               | 6                | 0              | -1.204842               | -6.715747  | -1.661484 |
| 18               | 6                | 0              | 1.128360                | -6.838712  | -2.191284 |
| 19               | 6                | 0              | -0.174770               | -7.383099  | -2.385063 |
| 20               | 1                | 0              | -2.195328               | -7.148424  | -1.593683 |
| 21               | 1                | 0              | 1.998865                | -7.407244  | -2.496035 |
| 22               | 7                | 0              | 0.268677                | -4.933748  | -1.002191 |
| 23               | 6                | 0              | -2.079579               | -4.959869  | -0.147440 |
| 24               | 6                | 0              | -1.842163               | -4.491098  | 1.158527  |
| 25               | 6                | 0              | -3.395149               | -4.920015  | -0.646609 |
| 26               | 6                | 0              | -2.895743               | -4.006651  | 1.932465  |
| 27               | 1                | 0              | -0.842292               | -4.498773  | 1.579625  |
| 28               | 6                | 0              | -4.443676               | -4.444024  | 0.136191  |
| 29               | 1                | 0              | -3.584143               | -5.241397  | -1.666452 |
| 30               | 6                | 0              | -4.198779               | -3.983374  | 1.431800  |
| 31               | 1                | 0              | -2.685798               | -3.645141  | 2.934930  |
| 32               | 1                | 0              | -5.450328               | -4.416281  | -0.273376 |
| 33               | 1                | 0              | -5.013914               | -3.600569  | 2.040292  |
| 34               | 6                | 0              | 2.736009                | -5.238343  | -1.174561 |
| 35               | 6                | 0              | 3.769252                | -5.382187  | -2.120358 |
| 36               | 6                | 0              | 3.052146                | -4.691612  | 0.084809  |
| 37               | 6                | 0              | 5.075014                | -5.007820  | -1.811214 |
| 38               | 1                | 0              | 3.537035                | -5.767422  | -3.109235 |
| 39               | 6                | 0              | 4.354067                | -4.292246  | 0.379086  |
| 40               | 1                | 0              | 2.286260                | -4.561850  | 0.842627  |
| 41               | 6                | 0              | 5.372671                | -4.456181  | -0.561979 |
| 42               | 1                | 0              | 5.857243                | -5.124932  | -2.557353 |
| 43               | 1                | 0              | 4.536347                | -3.830800  | 1.343759  |
| 44               | 1                | 0              | 6.387599                | -4.141973  | -0.332416 |
| 45               | 6                | 0              | -0.405639               | -8.587677  | -3.171026 |
| 46               | 6                | 0              | 0.561758                | -9.062749  | -4.093846 |
| 47               | 6                | 0              | -1.601665               | -9.343477  | -3.069594 |
| 48               | 6                | 0              | 0.351652                | -10.211047 | -4.848174 |
| 49               | 1                | 0              | 1.479183                | -8.501775  | -4.239265 |
| 50               | 6                | 0              | -1.807889               | -10.489339 | -3.828434 |

|    |   |   |           |            |           |
|----|---|---|-----------|------------|-----------|
| 51 | 1 | 0 | -2.371047 | -9.041126  | -2.367006 |
| 52 | 6 | 0 | -0.835006 | -10.941049 | -4.726530 |
| 53 | 1 | 0 | 1.119021  | -10.534876 | -5.547565 |
| 54 | 1 | 0 | -2.737053 | -11.042466 | -3.712048 |
| 55 | 1 | 0 | -0.999091 | -11.836977 | -5.318283 |
| 56 | 9 | 0 | 1.056544  | -2.073412  | 3.911769  |
| 57 | 9 | 0 | 0.899942  | -1.589371  | 1.665609  |
| 58 | 9 | 0 | 0.988589  | -3.781826  | 2.366891  |
| 59 | 9 | 0 | 2.858313  | -2.456800  | 2.525949  |
| 60 | 5 | 0 | 1.459851  | -2.451678  | 2.637553  |

### III

B3LYP/6-31G(d,p) Electronic Energy: -2161.8082867 a.u.

B3LYP/6-31G(d,p) Gibbs free Energy: -2161.391741 a.u.

B3LYP-D3(SMD-THF) Electronic Energy: -2163.1353427 a.u.

| Center<br>Number | Atomic<br>Number | Atomic<br>Type | Coordinates (Angstroms) |           |           |
|------------------|------------------|----------------|-------------------------|-----------|-----------|
|                  |                  |                | X                       | Y         | Z         |
| 1                | 6                | 0              | -3.504561               | 0.638117  | -0.100216 |
| 2                | 6                | 0              | -1.367397               | 1.432380  | -0.644276 |
| 3                | 6                | 0              | -1.748838               | 2.747965  | -0.468687 |
| 4                | 6                | 0              | -3.085605               | 3.050370  | -0.084557 |
| 5                | 6                | 0              | -3.935603               | 1.972891  | 0.088881  |
| 6                | 6                | 0              | -4.330599               | -0.516771 | 0.047535  |
| 7                | 6                | 0              | -4.446097               | -2.853635 | -0.124624 |
| 8                | 6                | 0              | -5.775600               | -2.871537 | 0.241548  |
| 9                | 6                | 0              | -6.446771               | -1.648845 | 0.536124  |
| 10               | 6                | 0              | -5.694397               | -0.494157 | 0.425674  |
| 11               | 1                | 0              | -0.354853               | 1.170711  | -0.932172 |
| 12               | 1                | 0              | -1.009802               | 3.523464  | -0.624596 |
| 13               | 1                | 0              | -4.967112               | 2.141730  | 0.379092  |
| 14               | 1                | 0              | -3.913559               | -3.767759 | -0.363253 |
| 15               | 1                | 0              | -6.280454               | -3.827570 | 0.297498  |
| 16               | 1                | 0              | -6.149536               | 0.467411  | 0.638350  |
| 17               | 7                | 0              | -2.194591               | 0.378746  | -0.476153 |
| 18               | 7                | 0              | -3.705558               | -1.726472 | -0.229936 |
| 19               | 6                | 0              | -3.589955               | 4.488003  | 0.134182  |
| 20               | 6                | 0              | -4.751243               | 4.786468  | -0.843680 |
| 21               | 6                | 0              | -4.094607               | 4.646113  | 1.588171  |
| 22               | 6                | 0              | -2.483410               | 5.533578  | -0.104144 |
| 23               | 1                | 0              | -4.419983               | 4.687571  | -1.882767 |
| 24               | 1                | 0              | -5.588751               | 4.098190  | -0.696481 |
| 25               | 1                | 0              | -5.125998               | 5.807935  | -0.700049 |
| 26               | 1                | 0              | -3.290323               | 4.443190  | 2.302766  |
| 27               | 1                | 0              | -4.459188               | 5.666481  | 1.762647  |
| 28               | 1                | 0              | -4.913527               | 3.954972  | 1.808122  |
| 29               | 1                | 0              | -2.881364               | 6.541126  | 0.062259  |
| 30               | 1                | 0              | -1.639463               | 5.391686  | 0.578562  |
| 31               | 1                | 0              | -2.100828               | 5.491804  | -1.129127 |
| 32               | 6                | 0              | -7.924860               | -1.584137 | 0.959732  |
| 33               | 6                | 0              | -8.035193               | -0.947742 | 2.365755  |
| 34               | 6                | 0              | -8.720377               | -0.725101 | -0.051793 |
| 35               | 6                | 0              | -8.574000               | -2.980633 | 1.014811  |
| 36               | 1                | 0              | -7.483578               | -1.538908 | 3.104012  |
| 37               | 1                | 0              | -7.625018               | 0.066292  | 2.382147  |
| 38               | 1                | 0              | -9.083767               | -0.892154 | 2.685232  |
| 39               | 1                | 0              | -8.665318               | -1.156894 | -1.056636 |
| 40               | 1                | 0              | -9.777459               | -0.665065 | 0.237227  |
| 41               | 1                | 0              | -8.330043               | 0.295361  | -0.108379 |

|    |    |   |           |           |           |
|----|----|---|-----------|-----------|-----------|
| 42 | 1  | 0 | -9.623282 | -2.891672 | 1.318695  |
| 43 | 1  | 0 | -8.550682 | -3.476673 | 0.039031  |
| 44 | 1  | 0 | -8.072030 | -3.631623 | 1.737823  |
| 45 | 24 | 0 | -1.693845 | -1.626828 | -0.643166 |
| 46 | 17 | 0 | -1.666528 | -3.824685 | -1.516557 |
| 47 | 17 | 0 | 0.505766  | -1.148597 | -1.357960 |
| 48 | 6  | 0 | 0.629096  | -4.038606 | 3.899812  |
| 49 | 6  | 0 | -0.217855 | -3.097353 | 3.321905  |
| 50 | 6  | 0 | -0.260535 | -2.933184 | 1.926630  |
| 51 | 6  | 0 | 0.565796  | -3.722964 | 1.117684  |
| 52 | 6  | 0 | 1.422054  | -4.659878 | 1.700826  |
| 53 | 6  | 0 | 1.454315  | -4.823080 | 3.086735  |
| 54 | 1  | 0 | 0.650928  | -4.162658 | 4.980328  |
| 55 | 1  | 0 | -0.861098 | -2.466946 | 3.928295  |
| 56 | 1  | 0 | 0.533912  | -3.597770 | 0.042159  |
| 57 | 1  | 0 | 2.063781  | -5.265916 | 1.066491  |
| 58 | 1  | 0 | 2.119107  | -5.558718 | 3.534338  |
| 59 | 6  | 0 | -1.202737 | -1.888847 | 1.365468  |
| 60 | 8  | 0 | -1.741998 | -1.108002 | 2.131266  |

### III'

B3LYP/6-31G(d,p) Electronic Energy: -2087.7963096 a. u.

B3LYP/6-31G(d,p) Gibbs free Energy: -2087.360411 a. u.

B3LYP-D3(SMD-THF) Electronic Energy: -2089.0950695 a. u.

| Center<br>Number | Atomic<br>Number | Atomic<br>Type | Coordinates (Angstroms) |           |           |
|------------------|------------------|----------------|-------------------------|-----------|-----------|
|                  |                  |                | X                       | Y         | Z         |
| 1                | 6                | 0              | -3.204433               | 0.578937  | -0.315502 |
| 2                | 6                | 0              | -1.275996               | 1.670905  | -1.087129 |
| 3                | 6                | 0              | -1.720942               | 2.896538  | -0.636447 |
| 4                | 6                | 0              | -2.985455               | 2.995938  | 0.015388  |
| 5                | 6                | 0              | -3.698471               | 1.819507  | 0.155826  |
| 6                | 6                | 0              | -3.884364               | -0.671133 | -0.205701 |
| 7                | 6                | 0              | -3.793629               | -2.968910 | -0.659956 |
| 8                | 6                | 0              | -5.040543               | -3.183447 | -0.109353 |
| 9                | 6                | 0              | -5.773037               | -2.090376 | 0.434252  |
| 10               | 6                | 0              | -5.166422               | -0.849586 | 0.367336  |
| 11               | 1                | 0              | -0.326276               | 1.566213  | -1.601418 |
| 12               | 1                | 0              | -1.091470               | 3.762788  | -0.795611 |
| 13               | 1                | 0              | -4.666524               | 1.830860  | 0.645617  |
| 14               | 1                | 0              | -3.213618               | -3.781577 | -1.083304 |
| 15               | 1                | 0              | -5.431516               | -4.192808 | -0.100439 |
| 16               | 1                | 0              | -5.676159               | 0.022318  | 0.763480  |
| 17               | 7                | 0              | -1.969458               | 0.517806  | -0.950119 |
| 18               | 7                | 0              | -3.196550               | -1.757855 | -0.728288 |
| 19               | 6                | 0              | -3.553400               | 4.324698  | 0.545204  |
| 20               | 6                | 0              | -4.899107               | 4.631320  | -0.154156 |
| 21               | 6                | 0              | -3.785272               | 4.220376  | 2.071439  |
| 22               | 6                | 0              | -2.600051               | 5.507367  | 0.286291  |
| 23               | 1                | 0              | -4.763600               | 4.716730  | -1.237392 |
| 24               | 1                | 0              | -5.635556               | 3.842614  | 0.025940  |
| 25               | 1                | 0              | -5.320809               | 5.575539  | 0.213378  |
| 26               | 1                | 0              | -2.846255               | 4.009765  | 2.593879  |
| 27               | 1                | 0              | -4.193307               | 5.159356  | 2.466730  |
| 28               | 1                | 0              | -4.487910               | 3.419102  | 2.318518  |
| 29               | 1                | 0              | -3.039582               | 6.432075  | 0.677286  |
| 30               | 1                | 0              | -1.633429               | 5.363590  | 0.779843  |
| 31               | 1                | 0              | -2.416082               | 5.652298  | -0.783165 |
| 32               | 6                | 0              | -7.163607               | -2.248611 | 1.074388  |

|    |    |   |           |           |           |
|----|----|---|-----------|-----------|-----------|
| 33 | 6  | 0 | -7.107275 | -1.792810 | 2.551934  |
| 34 | 6  | 0 | -8.191433 | -1.380057 | 0.311020  |
| 35 | 6  | 0 | -7.653997 | -3.709036 | 1.042347  |
| 36 | 1  | 0 | -6.382906 | -2.390128 | 3.114937  |
| 37 | 1  | 0 | -6.808125 | -0.744020 | 2.638231  |
| 38 | 1  | 0 | -8.089454 | -1.903124 | 3.029127  |
| 39 | 1  | 0 | -8.256600 | -1.686250 | -0.738369 |
| 40 | 1  | 0 | -9.188901 | -1.477656 | 0.758163  |
| 41 | 1  | 0 | -7.917877 | -0.320942 | 0.330286  |
| 42 | 1  | 0 | -8.645248 | -3.778737 | 1.504717  |
| 43 | 1  | 0 | -7.737136 | -4.085684 | 0.017671  |
| 44 | 1  | 0 | -6.981388 | -4.373358 | 1.594252  |
| 45 | 24 | 0 | -1.326573 | -1.358312 | -1.534888 |
| 46 | 17 | 0 | -1.098292 | -3.556671 | -2.397785 |
| 47 | 17 | 0 | 0.372528  | -0.467793 | -2.922487 |
| 48 | 6  | 0 | -1.767219 | -1.900050 | 3.505666  |
| 49 | 6  | 0 | -1.179777 | -1.360706 | 2.362490  |
| 50 | 6  | 0 | -0.697495 | -2.184563 | 1.324232  |
| 51 | 6  | 0 | -0.839592 | -3.579457 | 1.487395  |
| 52 | 6  | 0 | -1.425093 | -4.118309 | 2.630394  |
| 53 | 6  | 0 | -1.892803 | -3.284166 | 3.651113  |
| 54 | 1  | 0 | -2.126331 | -1.236314 | 4.289616  |
| 55 | 1  | 0 | -1.086342 | -0.282016 | 2.260715  |
| 56 | 1  | 0 | -0.494986 | -4.230942 | 0.688755  |
| 57 | 1  | 0 | -1.518393 | -5.198080 | 2.726945  |
| 58 | 1  | 0 | -2.348164 | -3.706102 | 4.543794  |
| 59 | 6  | 0 | -0.065923 | -1.617000 | 0.118143  |
| 60 | 1  | 0 | 0.339429  | -0.614812 | 0.274840  |
| 61 | 1  | 0 | 0.683203  | -2.270844 | -0.331013 |

#### IV

B3LYP/6-31G(d,p) Electronic Energy: -2432.7461658 a.u.

B3LYP/6-31G(d,p) Gibbs free Energy: -2432.219849 a.u.

B3LYP-D3(SMD-THF) Electronic Energy: -2434.2044876 a.u.

| Center<br>Number | Atomic<br>Number | Atomic<br>Type | Coordinates (Angstroms) |           |           |
|------------------|------------------|----------------|-------------------------|-----------|-----------|
|                  |                  |                | X                       | Y         | Z         |
| 1                | 6                | 0              | -3.280412               | 0.632359  | -0.190557 |
| 2                | 6                | 0              | -1.284533               | 1.647978  | -0.755252 |
| 3                | 6                | 0              | -1.760800               | 2.904083  | -0.383580 |
| 4                | 6                | 0              | -3.059003               | 3.037787  | 0.114919  |
| 5                | 6                | 0              | -3.809385               | 1.858363  | 0.216457  |
| 6                | 6                | 0              | -4.024116               | -0.647388 | -0.080555 |
| 7                | 6                | 0              | -3.903967               | -2.942738 | -0.289499 |
| 8                | 6                | 0              | -5.241463               | -3.095078 | 0.075129  |
| 9                | 6                | 0              | -6.015767               | -1.968555 | 0.368444  |
| 10               | 6                | 0              | -5.370486               | -0.727260 | 0.280159  |
| 11               | 1                | 0              | -0.272049               | 1.513289  | -1.109897 |
| 12               | 1                | 0              | -1.098642               | 3.754881  | -0.484040 |
| 13               | 1                | 0              | -4.811283               | 1.892235  | 0.626709  |
| 14               | 1                | 0              | -3.279409               | -3.788219 | -0.563979 |
| 15               | 1                | 0              | -5.656188               | -4.094907 | 0.109542  |
| 16               | 1                | 0              | -5.926393               | 0.182282  | 0.473643  |
| 17               | 7                | 0              | -2.026394               | 0.540606  | -0.684238 |
| 18               | 7                | 0              | -3.305161               | -1.753186 | -0.359852 |
| 19               | 6                | 0              | -3.663788               | 4.381189  | 0.553207  |
| 20               | 6                | 0              | -4.936427               | 4.664616  | -0.279846 |
| 21               | 6                | 0              | -4.034539               | 4.311132  | 2.053707  |
| 22               | 6                | 0              | -2.682922               | 5.551452  | 0.351289  |



|    |    |   |           |           |           |
|----|----|---|-----------|-----------|-----------|
| 23 | 1  | 0 | -4.701391 | 4.717807  | -1.347624 |
| 24 | 1  | 0 | -5.692953 | 3.885899  | -0.145261 |
| 25 | 1  | 0 | -5.382314 | 5.619926  | 0.020880  |
| 26 | 1  | 0 | -3.149543 | 4.112020  | 2.666588  |
| 27 | 1  | 0 | -4.470949 | 5.261763  | 2.381877  |
| 28 | 1  | 0 | -4.764227 | 3.521609  | 2.256627  |
| 29 | 1  | 0 | -3.154966 | 6.487280  | 0.669033  |
| 30 | 1  | 0 | -1.770312 | 5.423466  | 0.942248  |
| 31 | 1  | 0 | -2.396806 | 5.664030  | -0.699378 |
| 32 | 6  | 0 | -7.501701 | -2.041312 | 0.756450  |
| 33 | 6  | 0 | -7.699463 | -1.405641 | 2.153051  |
| 34 | 6  | 0 | -8.339652 | -1.265202 | -0.287352 |
| 35 | 6  | 0 | -8.016810 | -3.491939 | 0.808758  |
| 36 | 1  | 0 | -7.117671 | -1.938517 | 2.912259  |
| 37 | 1  | 0 | -7.388522 | -0.356828 | 2.170922  |
| 38 | 1  | 0 | -8.756066 | -1.445431 | 2.442503  |
| 39 | 1  | 0 | -8.213499 | -1.693743 | -1.286502 |
| 40 | 1  | 0 | -9.403881 | -1.307499 | -0.027207 |
| 41 | 1  | 0 | -8.050011 | -0.211622 | -0.340179 |
| 42 | 1  | 0 | -9.074605 | -3.497512 | 1.092725  |
| 43 | 1  | 0 | -7.932095 | -3.987802 | -0.163396 |
| 44 | 1  | 0 | -7.472022 | -4.090207 | 1.546355  |
| 45 | 24 | 0 | -1.301398 | -1.385526 | -1.323635 |
| 46 | 17 | 0 | -0.971744 | -3.719912 | -1.785538 |
| 47 | 17 | 0 | -2.743597 | -0.894849 | -3.333521 |
| 48 | 6  | 0 | -0.254742 | -2.564281 | 4.188289  |
| 49 | 6  | 0 | -0.151963 | -1.741856 | 3.069289  |
| 50 | 6  | 0 | -0.414482 | -2.237901 | 1.780514  |
| 51 | 6  | 0 | -0.770922 | -3.584895 | 1.637310  |
| 52 | 6  | 0 | -0.858117 | -4.415588 | 2.758249  |
| 53 | 6  | 0 | -0.609236 | -3.909157 | 4.035081  |
| 54 | 1  | 0 | -0.055536 | -2.164208 | 5.180681  |
| 55 | 1  | 0 | 0.141465  | -0.699768 | 3.156465  |
| 56 | 1  | 0 | -0.947299 | -3.974271 | 0.639296  |
| 57 | 1  | 0 | -1.120082 | -5.463851 | 2.631724  |
| 58 | 1  | 0 | -0.686649 | -4.556554 | 4.906160  |
| 59 | 6  | 0 | -0.330477 | -1.266606 | 0.601062  |
| 60 | 8  | 0 | 0.278830  | -0.221306 | 0.823591  |
| 61 | 6  | 0 | 4.429711  | -1.207172 | -0.899230 |
| 62 | 6  | 0 | 3.841192  | 0.052691  | -1.025903 |
| 63 | 6  | 0 | 2.544296  | 0.179117  | -1.522674 |
| 64 | 6  | 0 | 1.779789  | -0.941309 | -1.908126 |
| 65 | 6  | 0 | 2.395951  | -2.205457 | -1.771122 |
| 66 | 6  | 0 | 3.691881  | -2.334233 | -1.277939 |
| 67 | 1  | 0 | 5.441690  | -1.310170 | -0.514154 |
| 68 | 1  | 0 | 4.396750  | 0.944392  | -0.739973 |
| 69 | 1  | 0 | 2.110441  | 1.171858  | -1.628504 |
| 70 | 1  | 0 | 1.824401  | -3.088003 | -2.043967 |
| 71 | 1  | 0 | 4.132172  | -3.325589 | -1.186037 |
| 72 | 6  | 0 | 0.406550  | -0.805893 | -2.442347 |
| 73 | 1  | 0 | 0.195726  | 0.216830  | -2.776564 |
| 74 | 1  | 0 | 0.225043  | -1.479375 | -3.284032 |

**TS**

B3LYP/6-31G(d,p) Electronic Energy: -2432.7208231 a. u.

B3LYP/6-31G(d,p) Gibbs free Energy: -2432.193921 a. u.

B3LYP-D3(SMD-THF) Electronic Energy: -2434.1745073 a. u.

| Center<br>Number | Atomic<br>Number | Atomic<br>Type | Coordinates (Angstroms) |   |   |
|------------------|------------------|----------------|-------------------------|---|---|
|                  |                  |                | X                       | Y | Z |

---

|    |    |   |           |           |           |
|----|----|---|-----------|-----------|-----------|
| 1  | 6  | 0 | -3.337097 | 0.790519  | -0.482938 |
| 2  | 6  | 0 | -1.518009 | 1.936853  | -1.337433 |
| 3  | 6  | 0 | -2.008713 | 3.152050  | -0.873950 |
| 4  | 6  | 0 | -3.225792 | 3.202302  | -0.182189 |
| 5  | 6  | 0 | -3.884109 | 1.980454  | 0.002602  |
| 6  | 6  | 0 | -3.957976 | -0.533595 | -0.308505 |
| 7  | 6  | 0 | -3.740237 | -2.804161 | -0.709145 |
| 8  | 6  | 0 | -4.948150 | -3.078060 | -0.076782 |
| 9  | 6  | 0 | -5.709343 | -2.034806 | 0.470030  |
| 10 | 6  | 0 | -5.180254 | -0.746674 | 0.334573  |
| 11 | 1  | 0 | -0.597657 | 1.882195  | -1.902741 |
| 12 | 1  | 0 | -1.427286 | 4.045150  | -1.065217 |
| 13 | 1  | 0 | -4.828461 | 1.950466  | 0.533148  |
| 14 | 1  | 0 | -3.131256 | -3.583432 | -1.157446 |
| 15 | 1  | 0 | -5.276374 | -4.108729 | -0.024074 |
| 16 | 1  | 0 | -5.721820 | 0.103662  | 0.731977  |
| 17 | 7  | 0 | -2.163082 | 0.776522  | -1.155439 |
| 18 | 7  | 0 | -3.240795 | -1.563810 | -0.825695 |
| 19 | 6  | 0 | -3.837491 | 4.503545  | 0.361080  |
| 20 | 6  | 0 | -5.226729 | 4.727343  | -0.282241 |
| 21 | 6  | 0 | -3.993186 | 4.394734  | 1.896725  |
| 22 | 6  | 0 | -2.958948 | 5.730237  | 0.051145  |
| 23 | 1  | 0 | -5.144517 | 4.810106  | -1.370770 |
| 24 | 1  | 0 | -5.913715 | 3.904520  | -0.062684 |
| 25 | 1  | 0 | -5.679115 | 5.650945  | 0.098118  |
| 26 | 1  | 0 | -3.022579 | 4.235347  | 2.377106  |
| 27 | 1  | 0 | -4.429570 | 5.315374  | 2.302179  |
| 28 | 1  | 0 | -4.644844 | 3.563157  | 2.181321  |
| 29 | 1  | 0 | -3.429816 | 6.633256  | 0.454567  |
| 30 | 1  | 0 | -1.966244 | 5.642711  | 0.504152  |
| 31 | 1  | 0 | -2.830968 | 5.875682  | -1.026346 |
| 32 | 6  | 0 | -7.052856 | -2.251503 | 1.184739  |
| 33 | 6  | 0 | -6.947934 | -1.735992 | 2.639945  |
| 34 | 6  | 0 | -8.162505 | -1.470629 | 0.441123  |
| 35 | 6  | 0 | -7.453491 | -3.738225 | 1.226767  |
| 36 | 1  | 0 | -6.168480 | -2.273022 | 3.189891  |
| 37 | 1  | 0 | -6.706054 | -0.669675 | 2.677271  |
| 38 | 1  | 0 | -7.899336 | -1.881627 | 3.165009  |
| 39 | 1  | 0 | -8.259759 | -1.817889 | -0.592561 |
| 40 | 1  | 0 | -9.127867 | -1.611734 | 0.941359  |
| 41 | 1  | 0 | -7.955293 | -0.396765 | 0.412858  |
| 42 | 1  | 0 | -8.412920 | -3.847349 | 1.743714  |
| 43 | 1  | 0 | -7.569051 | -4.156288 | 0.221583  |
| 44 | 1  | 0 | -6.716081 | -4.342245 | 1.765096  |
| 45 | 24 | 0 | -1.359673 | -1.049565 | -1.795658 |
| 46 | 17 | 0 | -1.120694 | -3.319643 | -2.622812 |
| 47 | 17 | 0 | -1.580801 | -0.026170 | -4.060755 |
| 48 | 6  | 0 | 0.112335  | -2.452894 | 3.356284  |
| 49 | 6  | 0 | 0.075161  | -1.479817 | 2.359989  |
| 50 | 6  | 0 | -0.042421 | -1.834235 | 1.003113  |
| 51 | 6  | 0 | -0.108906 | -3.195270 | 0.671878  |
| 52 | 6  | 0 | -0.059415 | -4.169262 | 1.670735  |
| 53 | 6  | 0 | 0.046157  | -3.806826 | 3.015576  |
| 54 | 1  | 0 | 0.199624  | -2.157365 | 4.400214  |
| 55 | 1  | 0 | 0.140786  | -0.423503 | 2.599521  |
| 56 | 1  | 0 | -0.203824 | -3.489091 | -0.367774 |
| 57 | 1  | 0 | -0.101126 | -5.219929 | 1.392321  |
| 58 | 1  | 0 | 0.078649  | -4.570517 | 3.789757  |
| 59 | 6  | 0 | -0.159565 | -0.695380 | 0.006480  |
| 60 | 8  | 0 | 0.116388  | 0.442335  | 0.413658  |

|    |   |   |          |           |           |
|----|---|---|----------|-----------|-----------|
| 61 | 6 | 0 | 4.536062 | -2.811775 | -0.202675 |
| 62 | 6 | 0 | 4.222583 | -1.502575 | 0.175032  |
| 63 | 6 | 0 | 3.082411 | -0.876055 | -0.322477 |
| 64 | 6 | 0 | 2.216151 | -1.536839 | -1.219349 |
| 65 | 6 | 0 | 2.541499 | -2.861345 | -1.581626 |
| 66 | 6 | 0 | 3.682478 | -3.485421 | -1.081527 |
| 67 | 1 | 0 | 5.428694 | -3.298841 | 0.182707  |
| 68 | 1 | 0 | 4.872526 | -0.965664 | 0.863379  |
| 69 | 1 | 0 | 2.832940 | 0.133990  | -0.009189 |
| 70 | 1 | 0 | 1.878323 | -3.391021 | -2.260148 |
| 71 | 1 | 0 | 3.909301 | -4.506088 | -1.383052 |
| 72 | 6 | 0 | 1.024510 | -0.865441 | -1.773488 |
| 73 | 1 | 0 | 1.128152 | 0.217297  | -1.820151 |
| 74 | 1 | 0 | 0.765707 | -1.276306 | -2.752150 |

### 3a

B3LYP/6-31G(d,p) Electronic Energy: -615.9491016 a.u.

B3LYP/6-31G(d,p) Gibbs free Energy: -615.770568 a.u.

B3LYP-D3(SMD-THF) Electronic Energy: -616.1993124 a.u.

| Center Number | Atomic Number | Atomic Type | Coordinates (Angstroms) |           |           |
|---------------|---------------|-------------|-------------------------|-----------|-----------|
|               |               |             | X                       | Y         | Z         |
| 1             | 6             | 0           | 2.139283                | -5.763492 | 3.078305  |
| 2             | 6             | 0           | 1.562127                | -5.027697 | 2.043061  |
| 3             | 6             | 0           | 1.054860                | -3.741297 | 2.283557  |
| 4             | 6             | 0           | 1.137185                | -3.207482 | 3.579950  |
| 5             | 6             | 0           | 1.716257                | -3.940188 | 4.611252  |
| 6             | 6             | 0           | 2.218686                | -5.221100 | 4.362168  |
| 7             | 1             | 0           | 2.527059                | -6.758880 | 2.882426  |
| 8             | 1             | 0           | 1.507320                | -5.465668 | 1.051905  |
| 9             | 1             | 0           | 0.737469                | -2.213164 | 3.748392  |
| 10            | 1             | 0           | 1.776905                | -3.516825 | 5.609675  |
| 11            | 1             | 0           | 2.670382                | -5.794567 | 5.166695  |
| 12            | 6             | 0           | 0.413579                | -2.896092 | 1.219670  |
| 13            | 8             | 0           | -0.058496               | -1.806197 | 1.496181  |
| 14            | 6             | 0           | -1.126880               | -0.713094 | -3.202844 |
| 15            | 6             | 0           | -1.977418               | -1.185631 | -2.200205 |
| 16            | 6             | 0           | -1.498823               | -2.066087 | -1.231432 |
| 17            | 6             | 0           | -0.163123               | -2.490331 | -1.247618 |
| 18            | 6             | 0           | 0.680440                | -2.008681 | -2.254801 |
| 19            | 6             | 0           | 0.204869                | -1.126691 | -3.227460 |
| 20            | 1             | 0           | -1.500873               | -0.028045 | -3.958411 |
| 21            | 1             | 0           | -3.015542               | -0.866512 | -2.172367 |
| 22            | 1             | 0           | -2.164384               | -2.422964 | -0.450760 |
| 23            | 1             | 0           | 1.719922                | -2.327592 | -2.280068 |
| 24            | 1             | 0           | 0.875004                | -0.765566 | -4.002599 |
| 25            | 6             | 0           | 0.356605                | -3.455888 | -0.209850 |
| 26            | 1             | 0           | -0.271046               | -4.358323 | -0.173877 |
| 27            | 1             | 0           | 1.357863                | -3.805483 | -0.486736 |

### TS'

B3LYP/6-31G(d,p) Electronic Energy: -1636.9225205 a.u.

B3LYP/6-31G(d,p) Gibbs free Energy: -1636.524797 a.u.

B3LYP-D3(SMD-THF) Electronic Energy: -1637.6433379 a.u.

| Center Number | Atomic Number | Atomic Type | Coordinates (Angstroms) |   |   |
|---------------|---------------|-------------|-------------------------|---|---|
|               |               |             | X                       | Y | Z |

---

|    |   |   |           |            |           |
|----|---|---|-----------|------------|-----------|
| 1  | 6 | 0 | -2.796727 | -1.273642  | -2.871804 |
| 2  | 6 | 0 | -2.314923 | -0.987348  | -1.587854 |
| 3  | 6 | 0 | -1.175740 | -1.618711  | -1.104498 |
| 4  | 6 | 0 | -0.476551 | -2.551584  | -1.907495 |
| 5  | 6 | 0 | -0.972629 | -2.826485  | -3.202308 |
| 6  | 6 | 0 | -2.119207 | -2.195964  | -3.675573 |
| 7  | 1 | 0 | -3.691375 | -0.780247  | -3.243012 |
| 8  | 1 | 0 | -2.836344 | -0.268462  | -0.961385 |
| 9  | 1 | 0 | -0.790211 | -1.406814  | -0.111450 |
| 10 | 1 | 0 | -0.445256 | -3.540994  | -3.829800 |
| 11 | 1 | 0 | -2.486669 | -2.419871  | -4.674319 |
| 12 | 6 | 0 | 0.715288  | -3.190122  | -1.399034 |
| 13 | 1 | 0 | 1.455834  | -3.488188  | -2.133134 |
| 14 | 1 | 0 | 1.107798  | -2.809334  | -0.463573 |
| 15 | 6 | 0 | -0.875768 | -5.562078  | -0.983074 |
| 16 | 6 | 0 | 1.436267  | -5.875064  | -1.309940 |
| 17 | 6 | 0 | -1.154374 | -6.662014  | -1.788405 |
| 18 | 6 | 0 | 1.194135  | -6.979491  | -2.115305 |
| 19 | 6 | 0 | -0.123357 | -7.388230  | -2.413800 |
| 20 | 1 | 0 | -2.184166 | -6.984089  | -1.891531 |
| 21 | 1 | 0 | 2.031521  | -7.590119  | -2.434449 |
| 22 | 7 | 0 | 0.407871  | -5.107136  | -0.813705 |
| 23 | 6 | 0 | -1.936961 | -4.882557  | -0.203800 |
| 24 | 6 | 0 | -1.614470 | -4.260701  | 1.015785  |
| 25 | 6 | 0 | -3.276692 | -4.871064  | -0.632637 |
| 26 | 6 | 0 | -2.609894 | -3.659870  | 1.784684  |
| 27 | 1 | 0 | -0.588541 | -4.233591  | 1.366207  |
| 28 | 6 | 0 | -4.266650 | -4.270121  | 0.140163  |
| 29 | 1 | 0 | -3.540019 | -5.301380  | -1.594414 |
| 30 | 6 | 0 | -3.938203 | -3.663783  | 1.355792  |
| 31 | 1 | 0 | -2.329439 | -3.182569  | 2.719158  |
| 32 | 1 | 0 | -5.294297 | -4.261255  | -0.214881 |
| 33 | 1 | 0 | -4.711232 | -3.190677  | 1.956238  |
| 34 | 6 | 0 | 2.806131  | -5.469668  | -0.914266 |
| 35 | 6 | 0 | 3.925745  | -5.763475  | -1.715345 |
| 36 | 6 | 0 | 3.005543  | -4.755180  | 0.280850  |
| 37 | 6 | 0 | 5.202227  | -5.363257  | -1.326702 |
| 38 | 1 | 0 | 3.793896  | -6.281401  | -2.661424 |
| 39 | 6 | 0 | 4.280836  | -4.335217  | 0.656146  |
| 40 | 1 | 0 | 2.165340  | -4.522283  | 0.925851  |
| 41 | 6 | 0 | 5.384047  | -4.643540  | -0.141792 |
| 42 | 1 | 0 | 6.054304  | -5.595076  | -1.961415 |
| 43 | 1 | 0 | 4.373923  | -3.746222  | 1.562779  |
| 44 | 1 | 0 | 6.379309  | -4.315547  | 0.147891  |
| 45 | 6 | 0 | -0.393483 | -8.555108  | -3.272910 |
| 46 | 6 | 0 | 0.500334  | -8.921770  | -4.300588 |
| 47 | 6 | 0 | -1.546354 | -9.350206  | -3.105378 |
| 48 | 6 | 0 | 0.256203  | -10.025161 | -5.114492 |
| 49 | 1 | 0 | 1.382485  | -8.314042  | -4.476432 |
| 50 | 6 | 0 | -1.791665 | -10.450309 | -3.922263 |
| 51 | 1 | 0 | -2.241870 | -9.118460  | -2.304987 |
| 52 | 6 | 0 | -0.892601 | -10.798365 | -4.933885 |
| 53 | 1 | 0 | 0.962589  | -10.275823 | -5.901888 |
| 54 | 1 | 0 | -2.685649 | -11.047255 | -3.760465 |
| 55 | 1 | 0 | -1.084725 | -11.657572 | -5.570303 |
| 56 | 9 | 0 | 0.914229  | -1.625817  | 3.688341  |
| 57 | 9 | 0 | 1.014193  | -1.681873  | 1.387980  |
| 58 | 9 | 0 | 1.049206  | -3.645064  | 2.589803  |
| 59 | 9 | 0 | 2.870491  | -2.243844  | 2.637955  |
| 60 | 5 | 0 | 1.466694  | -2.283226  | 2.594117  |

---

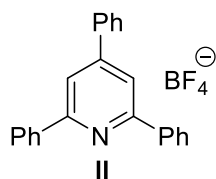

B3LYP/6-31G(d,p) Electronic Energy: -1366.0242335 a. u.

B3LYP/6-31G(d,p) Gibbs free Energy: -1365.735593 a. u.

B3LYP-D3(SMD-THF) Electronic Energy: -1366.6336678 a. u.

| Center Number | Atomic Number | Atomic Type | Coordinates (Angstroms) |            |           |
|---------------|---------------|-------------|-------------------------|------------|-----------|
|               |               |             | X                       | Y          | Z         |
| 1             | 6             | 0           | -1.582889               | -5.213282  | -0.983191 |
| 2             | 6             | 0           | 0.720866                | -5.158130  | -1.221213 |
| 3             | 6             | 0           | -1.591510               | -6.612448  | -0.991778 |
| 4             | 6             | 0           | 0.786728                | -6.560558  | -1.267806 |
| 5             | 6             | 0           | -0.386601               | -7.314148  | -1.141795 |
| 6             | 1             | 0           | -2.524030               | -7.154012  | -0.885916 |
| 7             | 1             | 0           | 1.735088                | -7.062202  | -1.426466 |
| 8             | 7             | 0           | -0.449015               | -4.503303  | -1.100352 |
| 9             | 6             | 0           | -2.843599               | -4.427197  | -0.846740 |
| 10            | 6             | 0           | -4.001979               | -4.968011  | -0.264997 |
| 11            | 6             | 0           | -2.891895               | -3.099985  | -1.304407 |
| 12            | 6             | 0           | -5.171061               | -4.215101  | -0.159293 |
| 13            | 1             | 0           | -3.985684               | -5.977648  | 0.132980  |
| 14            | 6             | 0           | -4.059895               | -2.348498  | -1.201414 |
| 15            | 1             | 0           | -1.993442               | -2.676793  | -1.738533 |
| 16            | 6             | 0           | -5.208253               | -2.902195  | -0.630580 |
| 17            | 1             | 0           | -6.052085               | -4.654205  | 0.301529  |
| 18            | 1             | 0           | -4.074578               | -1.325550  | -1.568811 |
| 19            | 1             | 0           | -6.119185               | -2.315342  | -0.548344 |
| 20            | 6             | 0           | 1.954614                | -4.324343  | -1.292881 |
| 21            | 6             | 0           | 1.859460                | -2.945538  | -1.548361 |
| 22            | 6             | 0           | 3.226390                | -4.883252  | -1.080226 |
| 23            | 6             | 0           | 3.001632                | -2.150511  | -1.600817 |
| 24            | 1             | 0           | 0.876780                | -2.512866  | -1.698675 |
| 25            | 6             | 0           | 4.366236                | -4.081558  | -1.125504 |
| 26            | 1             | 0           | 3.362724                | -5.936641  | -0.869420 |
| 27            | 6             | 0           | 4.262652                | -2.715432  | -1.388414 |
| 28            | 1             | 0           | 2.907940                | -1.086455  | -1.805575 |
| 29            | 1             | 0           | 5.328327                | -4.550185  | -0.942174 |
| 30            | 1             | 0           | 5.153624                | -2.093010  | -1.423962 |
| 31            | 6             | 0           | -0.347953               | -8.800162  | -1.162604 |
| 32            | 6             | 0           | 0.789752                | -9.487771  | -0.706654 |
| 33            | 6             | 0           | -1.440126               | -9.550193  | -1.633841 |
| 34            | 6             | 0           | 0.825779                | -10.880865 | -0.715683 |
| 35            | 1             | 0           | 1.662502                | -8.961455  | -0.340240 |
| 36            | 6             | 0           | -1.401032               | -10.943428 | -1.640345 |
| 37            | 1             | 0           | -2.315686               | -9.040308  | -2.026050 |
| 38            | 6             | 0           | -0.266864               | -11.615481 | -1.177766 |
| 39            | 1             | 0           | 1.727224                | -11.370455 | -0.360476 |
| 40            | 1             | 0           | -2.253027               | -11.503814 | -2.017548 |
| 41            | 1             | 0           | -0.235353               | -12.702153 | -1.186046 |
| 42            | 9             | 0           | 5.488172                | -9.229016  | -1.129884 |
| 43            | 9             | 0           | 4.929539                | -7.340990  | 0.067827  |
| 44            | 9             | 0           | 3.724161                | -9.291957  | 0.353193  |
| 45            | 9             | 0           | 3.540591                | -8.092918  | -1.597432 |
| 46            | 5             | 0           | 4.444619                | -8.499107  | -0.569144 |

Ph

B3LYP/6-31G(d,p) Electronic Energy: -270.9202558 a.u.

B3LYP/6-31G(d,p) Gibbs free Energy: -270.835136 a.u.

B3LYP-D3(SMD-THF) Electronic Energy: -271.0269556 a.u.

| Center Number | Atomic Number | Atomic Type | Coordinates (Angstroms) |           |           |
|---------------|---------------|-------------|-------------------------|-----------|-----------|
|               |               |             | X                       | Y         | Z         |
| 1             | 6             | 0           | -1.119278               | -0.667227 | -3.172020 |
| 2             | 6             | 0           | -1.975678               | -1.214633 | -2.205314 |
| 3             | 6             | 0           | -1.508092               | -2.160797 | -1.306953 |
| 4             | 6             | 0           | -0.151035               | -2.601605 | -1.339478 |
| 5             | 6             | 0           | 0.698077                | -2.028901 | -2.333349 |
| 6             | 6             | 0           | 0.219090                | -1.083374 | -3.226453 |
| 7             | 1             | 0           | -1.490106               | 0.073725  | -3.873781 |
| 8             | 1             | 0           | -3.013215               | -0.895088 | -2.159690 |
| 9             | 1             | 0           | -2.176233               | -2.581503 | -0.560030 |
| 10            | 1             | 0           | 1.736085                | -2.347685 | -2.380480 |
| 11            | 1             | 0           | 0.885886                | -0.662120 | -3.973857 |
| 12            | 6             | 0           | 0.329500                | -3.561842 | -0.430437 |
| 13            | 1             | 0           | -0.319935               | -3.995899 | 0.321934  |
| 14            | 1             | 0           | 1.361547                | -3.893939 | -0.459121 |

## 6. References

- [1] (a) F. J. R. Klauck, M. J. James, and F. Glorius, *Angew. Chem. Int. Ed.*, **2017**, *56*, 12336–12339; (b) J. Wu, P. S. Grant, X. Li, A. Noble, and V. K. Aggarwal, *Angew. Chem. Int. Ed.*, **2019**, *58*, 1–6.
- [2] T. Kerackian, A. Reina, D. Bouyssi, N. Monteiro, and A. Amgoune, *Org. Lett.*, **2020**, *22*, 2240–2245.
- [3] B. Zhao and X. Lu, *Org. Lett.*, **2006**, *8*, 5987–5990.
- [4] Y. Wong, K. Parthasarathy, and C. Cheng, *Org. Lett.*, **2010**, *12*, 1736–1739.
- [5] Z. Wang, L. Li, and Y. Huang, *J. Am. Chem. Soc.*, **2014**, *136*, 12233–12236.
- [6] C. L. D. Gibb, A. K. Sundaresan, V. Ramamurthy, and B. C. Gibb, *J. Am. Chem. Soc.*, **2008**, *130*, 4069–4080.
- [7] A. J. Wommack, D. C. Moebius, A. L. Travis, and J. S. Kingsbury, *Org. Lett.*, **2009**, *11*, 3202–3205.
- [8] A. Battace, M. Feuerstein, M. Lemhadri, T. Zair, H. Doucet, and M. Santelli, *Eur. J. Org. Chem.*, **2007**, 3122–3132.
- [9] W. C. Fu, C. M. So, O. Y. Yuen, I. T. Chuk Lee, and F. Y. Kwong, *Org. Lett.*, **2016**, *18*, 1872–1875.
- [10] C. Ye, B. Twamley, and J. M. Shreeve, *Org. Lett.*, **2005**, *7*, 3961–3964.
- [11] W. Zhang and J. M. Ready, *Angew. Chem. Int. Ed.*, **2014**, *53*, 8980–8984.
- [12] G. Wu, W. Yin, H. C. Shen and Y. Huang, *Green Chem.*, **2012**, *41*, 580–585.
- [13] K. Huang, G. Li, W. Huang, D. G. Yua and Z. J. Shi, *Chem. Commun.*, **2011**, *47*, 7224–7226.
- [14] E. Speckmeier, C. Padié, and K. Zeitler, *Org. Lett.*, **2015**, *17*, 4818–4821.
- [15] Gaussian 16, Revision A.03, M. J. Frisch, G. W. Trucks, H. B. Schlegel, G. E. Scuseria, M. A. Robb, J. R. Cheeseman, G. Scalmani, V. Barone, G. A. Petersson, H. Nakatsuji, X. Li, M. Caricato, A. V. Marenich, J. Bloino, B. G. Janesko, R. Gomperts, B. Mennucci, H. P. Hratchian, J. V. Ortiz, A. F. Izmaylov, J. L. Sonnenberg, D. Williams-Young, F. Ding, F. Lipparini, F. Egidi, J. Goings, B. Peng, A. Petrone, T. Henderson, D. Ranasinghe, V. G. Zakrzewski, J. Gao, N. Rega, G. Zheng, W. Liang, M. Hada, M. Ehara, K. Toyota, R. Fukuda, J. Hasegawa, M. Ishida, T. Nakajima, Y. Honda, O. Kitao, H. Nakai, T. Vreven, K. Throssell, J. A. Montgomery, Jr., J. E. Peralta, F. Ogliaro, M. J. Bearpark, J. J. Heyd, E. N. Brothers, K. N. Kudin, V. N. Staroverov, T. A. Keith, R. Kobayashi, J. Normand, K. Raghavachari, A. P. Rendell, J. C. Burant, S. S.

- 
- Iyengar, J. Tomasi, M. Cossi, J. M. Millam, M. Klene, C. Adamo, R. Cammi, J. W. Ochterski, R. L. Martin, K. Morokuma, O. Farkas, J. B. Foresman, and D. J. Fox, Gaussian, Inc., Wallingford CT, 2016.
- [16] CYLview, 1.0 b; C. Y. Legault, Université de Sherbrooke, 2009 (<http://www.cylview.org>).
- [17] (a) A. D. Becke, *J. Chem. Phys.*, **1993**, *98*, 5648; (b) C. Lee, W. Yang and G. Parr, *Phys. Rev. B: Condens. Matter Mater. Phys.*, **1988**, *37*, 785; (c) P. J. Stephens, F. J. Devlin, C. F. Chabalowski and M. J. Frisch, *J. Phys. Chem.*, **1994**, *98*, 11623.
- [18] (a) P. J. Hay and W. R. Wadt, *J. Chem. Phys.*, **1985**, *82*, 270; (b) P. J. Hay and W. R. Wadt, *J. Chem. Phys.*, **1985**, *82*, 299; (c) P. J. Hay and W. R. Wadt, *J. Chem. Phys.*, **1985**, *82*, 284.
- [19] (a) K. Fukui, *J. Phys. Chem.*, 1970, *74*, 4161; (b) K. Fukui, *Acc. Chem. Res.*, **1981**, *14*, 363.
- [20] A. V. Marenich, C. J. Cramer and D. G. Truhlar, *J. Phys. Chem. B*, **2009**, *113*, 6378.
- [21] (a) D. Andrae, U. Häussermann, M. Dolg, H. Stoll and H. Preuss, *Theor. Chim. Acta.*, **1990**, *77*, 123; (b) L. E. Roy, P. J. Hay and R. L. Martin, *J. Chem. Theory Comput.*, **2008**, *4*, 1029.
- [22] J. Liu, L. Lu, Y. Luo, W. Zhao, P. Sun, W. Jin, X. Qi, Y. Cheng, and W. Xiao, Photoredox-Enabled Chromium-Catalyzed Alkene Diacylations, *ACS Catal.*, 2022, *12*, 1879–1885.
- [23] (a) S. Grimme, J. Antony, S. Ehrlich, H. Krieg, *J. Chem. Phys.*, **2010**, *132*, 154104; (b) S. Grimme, S. Ehrlich, L. Goerigk, *J. Comput. Chem.*, **2011**, *32*, 1456–1465; (c) E. R. Johnson, A. D. Becke, *J. Chem. Phys.*, **2006**, *124*, 174104; (d) E. R. Johnson, A. D. Becke, *J. Chem. Phys.*, **2005**, *123*, 024101.
- [24] (a) R. A. Marcus, *J. Chem. Phys.*, **1956**, *24*, 966–978. (b) R. A. Marcus, *J. Chem. Phys.*, **1956**, *24*, 979–989; (c) R. A. Marcus, *J. Chem. Phys.*, **1957**, *26*, 872–877; (d) N. S. Hush, *J. Chem. Phys.*, **1958**, *28*, 962–972; (e) R. A. Marcus, *Can. J. Chem.*, **1959**, *37*, 155–163. (f) N. S. Hush, *Trans. Faraday Soc.*, **1961**, *57*, 557–580; (g) R. A. Marcus, *Faraday Discuss. Chem. Soc.*, **1982**, *74*, 7–15; (h) R. A. Marcus, N. Sutin, *Biochim. Biophys. Acta, Rev. Bioenerg.* **1985**, *811*, 265–322; (i) Z. Qi and J. Ma, *ACS Catal.*, **2018**, *8*, 1456–1463; (j) F. Calogero, S. Potenti, E. Bassan, A. Fermi, A. Gualandi, J. Monaldi, B. Dereli, B. Maity, L. Cavallo, P. Ceroni, and P. G., Cozzi, *Angew. Chem. Int. Ed.*, **2022**, *61*, e2021149.
- [25] T. Lu, F. Chen, Multiwfn: A Multifunctional Wavefunction Analyzer, *J. Comput. Chem.*, **2012**, *33*, 580-592.
